# Supplementary material for: Genomic Investigation of Two Acinetobacter baumannii Outbreaks in a Veterinary Intensive Care Unit in The Netherlands
Source: Pathogens. 2022 Jan 20;11(2):123. doi: 10.3390/pathogens11020123 (PMC8875366; doi:10.3390/pathogens11020123)
Supplement: Supplementary file 1 [file pathogens-11-00123-s001.zip]

Archive with 4 entries (4 files):
- Figure S1 and S2.pdf
- Table S1.xls
- Table S2.xlsx
- Table S3.xlsx
