# Supplementary material for: Genomic Investigation of Two Acinetobacter baumannii Outbreaks in a Veterinary Intensive Care Unit in The Netherlands
Source: Pathogens. 2022 Jan 20;11(2):123. doi: 10.3390/pathogens11020123 (PMC8875366; doi:10.3390/pathogens11020123)
Supplement: Supplementary file 1 [file pathogens-11-00123-s001.zip › Table S1.xls]

## Sheet: Sheet1
Table S1: Antimicrobial susceptibility test results of the outbreak isolates from 2012 and 2014
				gentamycin	kanamycin	neomycin	ceftiofur	cefoxitin	cephalotin	clindamycin	Chloramphenicol	enrofloxacin	fusidic acid	erythromycin	metronidazole	nitrofurantoin	amoxicillin	ampicillin	oxacillin	penicillin G	Colistin	rifampicin	Tetracyclin	trimethoprim/sulfamethoxazole
				aminoglycoside	aminoglycoside	aminoglycoside	cephalosporin	cephalosporin	cephalosporin	clindamycin	fenicol	Fluoroquinolone	fusidic acid	Macrolide	metronidazole	nitrofurantoin	penicillin	penicillin	penicillin	penicillin	polymixin	rifampicin	Tetracyclin	trimthoprim/sulfmethoxazole
Sample #	ST	Source	Date	GEN	KAN	NEO	CET	COX	CTN	CLI	CMP	ENR	FUS	ERY	MTR	NFT	AMC	AMP	OXA	PEN	COL	RAM	TET	T/SS
212092102901	2	dog 1 – respiratory tract	2012-07-05	R	R	R	R	R	R	R	R	R	R	R	R	R	R	R	R	R	S	R	R	R
212062205001	2	dog 2 - urinary tract	2012-06-22	R	R	R	R	R	R	R	R	R	R	R	R	R	R	R	R	R	S	R	R	R
212082004201	2	dog 3 - urinary tract	2012-08-20	R	R	R	R	R	R	R	R	R	R	R	R	R	R	R	R	R	S	R	R	R
212090506901	2	dog 4 - wound	2012-09-05	R	R	R	R	R	R	R	R	R	R	R	R	R	R	R	R	R	S	R	R	R
214030705701	2	dog 5 - respiratory tract	2014-03-07	R	R	R	R	R	R	R	R	R	R	R	R	R	R	R	R	R	S	R	R	R
214031705301	2	dog 6 - wound	2014-03-17	R	R	R	R	R	R	R	R	R	R	R	R	R	R	R	R	R	S	R	R	R
214032504901	2	ICU treatment table	2014-03-25	R	R	R	R	R	R	R	R	R	R	R	R	R	R	R	R	R	S	R	R	R
214032504501	?	medium care cage 9	2014-03-25	S	S	S	R	R	R	R	R	S	R	R	R	R	R	R	R	R	S	R	S	S
MCD-CH-OK3-2VP-1	241	dog 7 - skin (carriage)	2014-03-25	S	S	S	R	R	R	R	R	S	R	R	R	R	R	R	R	R	S	R	S	S
UKG-INI-T1-1N-1	239	clinic, operation table	2014-03-25	S	S	S	R	R	R	R	R	S	R	R	R	R	R	R	R	R	S	R	S	S
UKG-LNL-T1-4N-2	837	preparation room	2014-03-25	S	S	S	R	R	R	R	R	S	R	R	R	R	R	R	R	R	S	R	S	S
