# Supplementary material for: Genomic Investigation of Two Acinetobacter baumannii Outbreaks in a Veterinary Intensive Care Unit in The Netherlands
Source: Pathogens. 2022 Jan 20;11(2):123. doi: 10.3390/pathogens11020123 (PMC8875366; doi:10.3390/pathogens11020123)
Supplement: Supplementary file 1 [file pathogens-11-00123-s001.zip › Table S2.xlsx]

## Sheet: Sheet1
Table S2: Relevant genomes with known isolation date from literature
Isolate	Year	Reference
RUH134	1982	http://jcm.asm.org/content/34/6/1519 : sequenced in this study
RUH875	1984	http://jcm.asm.org/content/34/6/1519 : sequenced in this study
LUH5875	1997	http://jcm.asm.org/content/38/10/3636.long : sequenced in this study
212062205001	2012	this study
212082004201	2012	this study
212090506901	2012	this study
212092102901	2012	this study
214030705701	2014	this study
214031705301	2014	this study
214032504501	2014	this study
214032504901	2014	this study
MCDChOK32PV1	2014	this study
UKGInlT11N1	2014	this study
UKGInlT14N2	2014	this study
Acinetobacter_baumannii_OIFC338_uid188441	2003	PRJNA53469; included in this study for a skyline plot analysis; https://www.ncbi.nlm.nih.gov/nuccore/AMFX00000000.1
Acinetobacter_baumannii_ACICU_uid58765	2005	PRJNA17827; included in this study for a skyline plot analysis; http://www.ncbi.nlm.nih.gov/pmc/articles/PMC2593238/
Acinetobacter_baumannii_3990_uid190216	2006	PRJNA52395; included in this study for a skyline plot analysis; http://www.ncbi.nlm.nih.gov/pubmed/21398548
Acinetobacter_baumannii_ABNIH3_uid179839	2007	PRJNA63339; included in this study for a skyline plot analysis; http://www.ncbi.nlm.nih.gov/pubmed/21825119
Acinetobacter_baumannii_AB_2008_15_45_uid190535	2008	PRJNA172667; included in this study for a skyline plot analysis; http://journals.plos.org/plosone/article?id=10.1371/journal.pone.0054287
Acinetobacter_baumannii_AB5711_uid190313	2009	PRJNA77025; included in this study for a skyline plot analysis; http://www.ncbi.nlm.nih.gov/pmc/articles/PMC3294875/
Acinetobacter_baumannii_ATCC_19606_uid40853	1948	http://genomea.asm.org/content/2/4/e00832-14.full
Acinetobacter_baumannii_ATCC_17978_uid58731	1951	http://www.ncbi.nlm.nih.gov/pmc/articles/PMC2593238/
Acinetobacter_baumannii_AB307_0294_uid59271	1994	http://www.ncbi.nlm.nih.gov/pmc/articles/PMC2593238/
Acinetobacter_baumannii_A118_uid190037	1995	http://gbe.oxfordjournals.org/content/early/2014/08/23/gbe.evu176
Acinetobacter_baumannii_SDF_uid61601	1997	http://www.ncbi.nlm.nih.gov/pmc/articles/PMC3320269/#R4
Acinetobacter_baumannii_AB_TG2028_uid190557	2001	http://journals.plos.org/plosone/article?id=10.1371/journal.pone.0054287
Acinetobacter_baumannii_AB_TG2030_uid190558	2001	http://journals.plos.org/plosone/article?id=10.1371/journal.pone.0054287
Acinetobacter_baumannii_AB_TG2031_uid190559	2001	http://journals.plos.org/plosone/article?id=10.1371/journal.pone.0054287
Acinetobacter_baumannii_AYE_uid61637	2001	http://www.ncbi.nlm.nih.gov/pmc/articles/PMC2593238/
Acinetobacter_baumannii_OIFC021_uid188438	2003	http://www.ncbi.nlm.nih.gov/nuccore/AMFR00000000.1
Acinetobacter_baumannii_OIFC032_uid179753	2003	http://www.ncbi.nlm.nih.gov/nuccore/NZ_AFCZ00000000.2
Acinetobacter_baumannii_OIFC0162_uid180910	2003	http://www.ncbi.nlm.nih.gov/nuccore/NZ_AMFH00000000.1
Acinetobacter_baumannii_OIFC035_uid180958	2003	http://www.ncbi.nlm.nih.gov/nuccore/NZ_AMTB00000000.1
Acinetobacter_baumannii_AB900_uid55405	2003	http://www.ncbi.nlm.nih.gov/pmc/articles/PMC2593238/
Acinetobacter_baumannii_AB058_uid50773	2003	http://www.ncbi.nlm.nih.gov/pmc/articles/PMC2934971/
Acinetobacter_baumannii_OIFC137_uid179758	2003	https://www.ncbi.nlm.nih.gov/nuccore/NZ_AFDK00000000
Acinetobacter_baumannii_OIFC143_uid179759	2003	https://www.ncbi.nlm.nih.gov/nuccore/NZ_AFDL00000000
Acinetobacter_baumannii_OIFC189_uid179760	2003	https://www.ncbi.nlm.nih.gov/nuccore/NZ_AFDM00000000
Acinetobacter_baumannii_OIFC109_uid180778	2003	https://www.ncbi.nlm.nih.gov/nuccore/NZ_ALAL00000000
Acinetobacter_baumannii_OIFC074_uid180903	2003	https://www.ncbi.nlm.nih.gov/nuccore/NZ_AMDE00000000.1
Acinetobacter_baumannii_OIFC098_uid180904	2003	https://www.ncbi.nlm.nih.gov/nuccore/NZ_AMDF00000000.1
Acinetobacter_baumannii_OIFC180_uid180905	2003	https://www.ncbi.nlm.nih.gov/nuccore/NZ_AMDQ00000000.1
Acinetobacter_baumannii_OIFC110_uid180913	2003	https://www.ncbi.nlm.nih.gov/nuccore/NZ_AMFL00000000.1
Acinetobacter_baumannii_OIFC087_uid180914	2003	https://www.ncbi.nlm.nih.gov/nuccore/NZ_AMFS00000000.1
Acinetobacter_baumannii_OIFC099_uid180915	2003	https://www.ncbi.nlm.nih.gov/nuccore/NZ_AMFT00000000.1
Acinetobacter_baumannii_OIFC065_uid180916	2003	https://www.ncbi.nlm.nih.gov/nuccore/NZ_AMFV00000000.1
Acinetobacter_baumannii_OIFC047_uid188440	2003	https://www.ncbi.nlm.nih.gov/nuccore/NZ_AMFW00000000.1
Acinetobacter_baumannii_OIFC111_uid180917	2003	https://www.ncbi.nlm.nih.gov/nuccore/NZ_AMFY00000000
Acinetobacter_baumannii_AB0057_uid59083	2004	http://www.ncbi.nlm.nih.gov/pmc/articles/PMC2593238/
Acinetobacter_baumannii_AB056_uid50769	2004	http://www.ncbi.nlm.nih.gov/pmc/articles/PMC2934971/
Acinetobacter_baumannii_AB059_uid50775	2004	http://www.ncbi.nlm.nih.gov/pmc/articles/PMC2934971/
Acinetobacter_baumannii_1656_2_uid158677	2004	http://www.ncbi.nlm.nih.gov/pmc/articles/PMC3209198/
Acinetobacter_baumannii_AB210_uid179614	2005	http://jac.oxfordjournals.org/content/66/7/1499.long
Acinetobacter_baumannii_AB_TG27323_uid190562	2005	http://journals.plos.org/plosone/article?id=10.1371/journal.pone.0054287
Acinetobacter_baumannii_AB_TG27327_uid190563	2005	http://journals.plos.org/plosone/article?id=10.1371/journal.pone.0054287
Acinetobacter_baumannii_AB_TG27331_uid190564	2005	http://journals.plos.org/plosone/article?id=10.1371/journal.pone.0054287
Acinetobacter_baumannii_AB_TG27335_uid190565	2005	http://journals.plos.org/plosone/article?id=10.1371/journal.pone.0054287
Acinetobacter_baumannii_AB_TG27339_uid190566	2005	http://journals.plos.org/plosone/article?id=10.1371/journal.pone.0054287
Acinetobacter_baumannii_AB_TG27343_uid190567	2005	http://journals.plos.org/plosone/article?id=10.1371/journal.pone.0054287
Acinetobacter_baumannii_AB1H8_uid198275	2005	http://www.ncbi.nlm.nih.gov/pubmed/23723398
Acinetobacter_baumannii_AB_1536_8_uid190524	2006	http://journals.plos.org/plosone/article?id=10.1371/journal.pone.0054287
Acinetobacter_baumannii_AB_1582_8_uid190525	2006	http://journals.plos.org/plosone/article?id=10.1371/journal.pone.0054287
Acinetobacter_baumannii_AB_1583_8_uid190526	2006	http://journals.plos.org/plosone/article?id=10.1371/journal.pone.0054287
Acinetobacter_baumannii_AB_1594_8_uid190527	2006	http://journals.plos.org/plosone/article?id=10.1371/journal.pone.0054287
Acinetobacter_baumannii_AB_1595_8_uid190528	2006	http://journals.plos.org/plosone/article?id=10.1371/journal.pone.0054287
Acinetobacter_baumannii_AB_1649_8_uid190529	2006	http://journals.plos.org/plosone/article?id=10.1371/journal.pone.0054287
Acinetobacter_baumannii_AB_1650_8_uid190530	2006	http://journals.plos.org/plosone/article?id=10.1371/journal.pone.0054287
Acinetobacter_baumannii_AB_1766_8_uid190570	2006	http://journals.plos.org/plosone/article?id=10.1371/journal.pone.0054287
Acinetobacter_baumannii_AB_515_8_uid190544	2006	http://journals.plos.org/plosone/article?id=10.1371/journal.pone.0054287
Acinetobacter_baumannii_AB_TG2018_uid190553	2006	http://journals.plos.org/plosone/article?id=10.1371/journal.pone.0054287
Acinetobacter_baumannii_AB_TG2022_uid190554	2006	http://journals.plos.org/plosone/article?id=10.1371/journal.pone.0054287
Acinetobacter_baumannii_AB_TG2023_uid190555	2006	http://journals.plos.org/plosone/article?id=10.1371/journal.pone.0054287
Acinetobacter_baumannii_AB_TG2026_uid190556	2006	http://journals.plos.org/plosone/article?id=10.1371/journal.pone.0054287
Acinetobacter_baumannii_AB_TG2032_uid190560	2006	http://journals.plos.org/plosone/article?id=10.1371/journal.pone.0054287
Acinetobacter_baumannii_AB405E4_uid198276	2006	http://www.ncbi.nlm.nih.gov/nuccore/ANND00000000.1
Acinetobacter_baumannii_Naval_18_uid179754	2006	http://www.ncbi.nlm.nih.gov/nuccore/NZ_AFDA00000000.2
Acinetobacter_baumannii_Naval_81_uid179755	2006	http://www.ncbi.nlm.nih.gov/nuccore/NZ_AFDB00000000.2
Acinetobacter_baumannii_Naval_17_uid179762	2006	http://www.ncbi.nlm.nih.gov/nuccore/NZ_AFDO00000000.1
Acinetobacter_baumannii_Naval_13_uid180906	2006	http://www.ncbi.nlm.nih.gov/nuccore/NZ_AMDR00000000.1
Acinetobacter_baumannii_Naval_72_uid180911	2006	http://www.ncbi.nlm.nih.gov/nuccore/NZ_AMFI00000000.1
Acinetobacter_baumannii_Naval_83_uid180912	2006	http://www.ncbi.nlm.nih.gov/nuccore/NZ_AMFK00000000.1
Acinetobacter_baumannii_Naval_57_uid188436	2006	http://www.ncbi.nlm.nih.gov/nuccore/NZ_AMFP00000000.1
Acinetobacter_baumannii_Naval_78_uid188442	2006	http://www.ncbi.nlm.nih.gov/nuccore/NZ_AMFZ00000000.1
Acinetobacter_baumannii_Naval_82_uid180953	2006	http://www.ncbi.nlm.nih.gov/nuccore/NZ_AMSW00000000.1
Acinetobacter_baumannii_Naval_2_uid180954	2006	http://www.ncbi.nlm.nih.gov/nuccore/NZ_AMSX00000000.1
Acinetobacter_baumannii_Naval_21_uid180955	2006	http://www.ncbi.nlm.nih.gov/nuccore/NZ_AMSY00000000.1
Acinetobacter_baumannii_MDR_ZJ06_uid158685	2006	http://www.ncbi.nlm.nih.gov/pmc/articles/PMC3187012/
Acinetobacter_baumannii_AB4A3_uid198277	2006	http://www.sciencedirect.com/science/article/pii/S0195670109004691
Acinetobacter_baumannii_AB_2007_09_110_01_7_uid190531	2007	http://journals.plos.org/plosone/article?id=10.1371/journal.pone.0054287
Acinetobacter_baumannii_AB_2007_16_25_01_7_uid190532	2007	http://journals.plos.org/plosone/article?id=10.1371/journal.pone.0054287
Acinetobacter_baumannii_AB_2007_16_27_01_uid190533	2007	http://journals.plos.org/plosone/article?id=10.1371/journal.pone.0054287
Acinetobacter_baumannii_AB_908_12_uid190545	2007	http://journals.plos.org/plosone/article?id=10.1371/journal.pone.0054287
Acinetobacter_baumannii_AB_908_13_uid190546	2007	http://journals.plos.org/plosone/article?id=10.1371/journal.pone.0054287
Acinetobacter_baumannii_AB_908_14_7_uid190547	2007	http://journals.plos.org/plosone/article?id=10.1371/journal.pone.0054287
Acinetobacter_baumannii_AB_909_01_7_uid190548	2007	http://journals.plos.org/plosone/article?id=10.1371/journal.pone.0054287
Acinetobacter_baumannii_AB_909_02_7_uid190549	2007	http://journals.plos.org/plosone/article?id=10.1371/journal.pone.0054287
Acinetobacter_baumannii_AB_909_05_uid190550	2007	http://journals.plos.org/plosone/article?id=10.1371/journal.pone.0054287
Acinetobacter_baumannii_AB_909_14_7_uid190551	2007	http://journals.plos.org/plosone/article?id=10.1371/journal.pone.0054287
Acinetobacter_baumannii_AB_TG2631_uid190561	2007	http://journals.plos.org/plosone/article?id=10.1371/journal.pone.0054287
Acinetobacter_baumannii_AB_TG5064_uid190568	2007	http://journals.plos.org/plosone/article?id=10.1371/journal.pone.0054287
Acinetobacter_baumannii_Canada_BC_5_uid179761	2007	http://www.ncbi.nlm.nih.gov/nuccore/NZ_AFDN00000000.1
Acinetobacter_baumannii_WC_A_92_uid188439	2007	http://www.ncbi.nlm.nih.gov/nuccore/NZ_AMFU00000000.1
Acinetobacter_baumannii_Canada_BC1_uid180956	2007	http://www.ncbi.nlm.nih.gov/nuccore/NZ_AMSZ00000000.1
Acinetobacter_baumannii_3909_uid190217	2007	http://www.ncbi.nlm.nih.gov/pubmed/21398548
Acinetobacter_baumannii_ABNIH1_uid179837	2007	http://www.ncbi.nlm.nih.gov/pubmed/21825119
Acinetobacter_baumannii_ABNIH2_uid179838	2007	http://www.ncbi.nlm.nih.gov/pubmed/21825119
Acinetobacter_baumannii_ABNIH3_uid179839	2007	http://www.ncbi.nlm.nih.gov/pubmed/21825119
Acinetobacter_baumannii_ABNIH4_uid179840	2007	http://www.ncbi.nlm.nih.gov/pubmed/21825119
Acinetobacter_baumannii_BJAB07104_uid210971	2007	http://www.ncbi.nlm.nih.gov/pubmed/23826102
Acinetobacter_baumannii_BJAB0715_uid210972	2007	http://www.ncbi.nlm.nih.gov/pubmed/23826102
Acinetobacter_baumannii_AB_2008_15_34_7_uid190534	2008	http://journals.plos.org/plosone/article?id=10.1371/journal.pone.0054287
Acinetobacter_baumannii_AB_2008_15_52_uid190536	2008	http://journals.plos.org/plosone/article?id=10.1371/journal.pone.0054287
Acinetobacter_baumannii_AB_2008_15_69_uid190537	2008	http://journals.plos.org/plosone/article?id=10.1371/journal.pone.0054287
Acinetobacter_baumannii_AB_2008_15_70_uid190538	2008	http://journals.plos.org/plosone/article?id=10.1371/journal.pone.0054287
Acinetobacter_baumannii_AB_2008_15_71_uid190539	2008	http://journals.plos.org/plosone/article?id=10.1371/journal.pone.0054287
Acinetobacter_baumannii_AB_2008_23_01_01_7_uid190540	2008	http://journals.plos.org/plosone/article?id=10.1371/journal.pone.0054287
Acinetobacter_baumannii_AB_2008_23_07_01_7_uid190541	2008	http://journals.plos.org/plosone/article?id=10.1371/journal.pone.0054287
Acinetobacter_baumannii_AA_014_uid188443	2008	http://www.ebi.ac.uk/ena/data/view/AMGA01000001&display=text
Acinetobacter_baumannii_IS_235_uid180908	2008	http://www.ncbi.nlm.nih.gov/nuccore/NZ_AMEI00000000.1
Acinetobacter_baumannii_IS_251_uid180909	2008	http://www.ncbi.nlm.nih.gov/nuccore/NZ_AMEJ00000000.1
Acinetobacter_baumannii_IS_143_uid180919	2008	http://www.ncbi.nlm.nih.gov/nuccore/NZ_AMGE00000000.1
Acinetobacter_baumannii_IS_116_uid180920	2008	http://www.ncbi.nlm.nih.gov/nuccore/NZ_AMGF00000000.1
Acinetobacter_baumannii_IS_58_uid180922	2008	http://www.ncbi.nlm.nih.gov/nuccore/NZ_AMGH00000000.1
Acinetobacter_baumannii_WC_136_uid182891	2008	http://www.ncbi.nlm.nih.gov/nuccore/NZ_AMST00000000.1
Acinetobacter_baumannii_WC_A_694_uid180957	2008	http://www.ncbi.nlm.nih.gov/nuccore/NZ_AMTA00000000.1
Acinetobacter_baumannii_UMB001_uid190219	2008	http://www.ncbi.nlm.nih.gov/pmc/articles/PMC3126785/
Acinetobacter_baumannii_UMB002_uid190220	2008	http://www.ncbi.nlm.nih.gov/pmc/articles/PMC3126785/
Acinetobacter_baumannii_UMB003_uid190221	2008	http://www.ncbi.nlm.nih.gov/pmc/articles/PMC3126785/
Acinetobacter_baumannii_TCDC_AB0715_uid158679	2008	http://www.ncbi.nlm.nih.gov/pmc/articles/PMC3133099/
Acinetobacter_baumannii_TYTH_1_uid176498	2008	http://www.ncbi.nlm.nih.gov/pmc/articles/PMC3510636/
Acinetobacter_baumannii_BJAB0868_uid210973	2008	http://www.ncbi.nlm.nih.gov/pubmed/23826102
Acinetobacter_baumannii_WC_692_uid180921	2008	https://www.ncbi.nlm.nih.gov/nuccore/NZ_AMGG00000000.1
Acinetobacter_baumannii_AB_2009_04_01_7_uid190542	2009	http://journals.plos.org/plosone/article?id=10.1371/journal.pone.0054287
Acinetobacter_baumannii_AB_2009_04_02_7_uid190543	2009	http://journals.plos.org/plosone/article?id=10.1371/journal.pone.0054287
Acinetobacter_baumannii_IS_123_uid180859	2009	http://www.ncbi.nlm.nih.gov/nuccore/NZ_ALII00000000.1
Acinetobacter_baumannii_AB4857_uid190310	2009	http://www.ncbi.nlm.nih.gov/pmc/articles/PMC3294875/
Acinetobacter_baumannii_AB5075_uid190311	2009	http://www.ncbi.nlm.nih.gov/pmc/articles/PMC3294875/
Acinetobacter_baumannii_AB5256_uid190312	2009	http://www.ncbi.nlm.nih.gov/pmc/articles/PMC3294875/
Acinetobacter_baumannii_AB5711_uid190313	2009	http://www.ncbi.nlm.nih.gov/pmc/articles/PMC3294875/
Acinetobacter_baumannii_W6976_uid190357	2009	http://www.ncbi.nlm.nih.gov/pmc/articles/PMC3556118/#S1
Acinetobacter_baumannii_W7282_uid190358	2009	http://www.ncbi.nlm.nih.gov/pmc/articles/PMC3556118/#S1
Acinetobacter_baumannii_D1279779_uid190222	2009	http://www.ncbi.nlm.nih.gov/pmc/articles/PMC3602452/
Acinetobacter_baumannii_4190_uid190218	2009	http://www.ncbi.nlm.nih.gov/pubmed/21398548
Acinetobacter_baumannii_BZICU_2_uid190389	2010	http://www.ncbi.nlm.nih.gov/pmc/articles/PMC3486073/
Acinetobacter_baumannii_ABIsac_ColiR_uid198280	2010	http://www.ncbi.nlm.nih.gov/pmc/articles/PMC3535948/
Acinetobacter_baumannii_MSP4_16_uid191930	2010	http://www.ncbi.nlm.nih.gov/pmc/articles/PMC3622989/
Acinetobacter_baumannii_48055_uid198278	2010	http://www.ncbi.nlm.nih.gov/pmc/articles/PMC3673627/
Acinetobacter_baumannii_53264_uid198274	2010	http://www.ncbi.nlm.nih.gov/pmc/articles/PMC3673627/
Acinetobacter_baumannii_AC30_uid180878	2011	http://www.ncbi.nlm.nih.gov/bioproject/173033
Acinetobacter_baumannii_AC12_uid180779	2011	http://www.ncbi.nlm.nih.gov/pmc/articles/PMC3486123/
Acinetobacter_baumannii_ABIsac_ColiS_uid198279	2011	http://www.ncbi.nlm.nih.gov/pmc/articles/PMC3535948/
Acinetobacter_baumannii_ZWS1122_uid180923	2011	http://www.ncbi.nlm.nih.gov/pubmed/23209232
Acinetobacter_baumannii_PR07_uid199970	2012	http://www.ncbi.nlm.nih.gov/nuccore/APWV01000001.1
Acinetobacter_baumannii_ZWS1219_uid180924	2012	http://www.ncbi.nlm.nih.gov/pubmed/23209232
Acinetobacter_baumannii_MDR_TJ_uid162739	NA	http://jac.oxfordjournals.org/content/67/12/2825.long
Acinetobacter_baumannii_AB_TG19617_uid190552	na	http://journals.plos.org/plosone/article?id=10.1371/journal.pone.0054287
Acinetobacter_baumannii_TG19582_uid190569	NA	http://journals.plos.org/plosone/article?id=10.1371/journal.pone.0054287#pone.0054287.s003
Acinetobacter_baumannii_Ab11111_uid181745	na	http://www.broadinstitute.org/annotation/genome/Acinetobacter_baumannii/GenomeDescriptions.html#<i>Acinetobacter_baumannii</i>_Ab11111
Acinetobacter_baumannii_Ab33333_uid181747	na	http://www.broadinstitute.org/annotation/genome/Acinetobacter_baumannii/GenomeDescriptions.html#<i>Acinetobacter_baumannii</i>_Ab33333
Acinetobacter_baumannii_Ab44444_uid181748	na	http://www.broadinstitute.org/annotation/genome/Acinetobacter_baumannii/GenomeDescriptions.html#<i>Acinetobacter_baumannii</i>_Ab33333
Acinetobacter_baumannii_ZW85_1_uid231518	NA	http://www.ncbi.nlm.nih.gov/pmc/articles/PMC3900885/
