# Supplementary material for: Genomic Investigation of Two Acinetobacter baumannii Outbreaks in a Veterinary Intensive Care Unit in The Netherlands
Source: Pathogens. 2022 Jan 20;11(2):123. doi: 10.3390/pathogens11020123 (PMC8875366; doi:10.3390/pathogens11020123)
Supplement: Supplementary file 1 [file pathogens-11-00123-s001.zip › Table S3.xlsx]

## Sheet: Sheet1
Table S3: The recombination regions and the single nucleotide polymorphism (SNP) difference between outbreak isolates
Contig	Position	sequence surrounding SNP	reference base	SNP	RUH134	RUH875	LUH5875	212092102901	212062205001	212082004201	212090506901	214030705701	214031705301	214032504901	214032504501	UKGInlT11N1	UKGInlT14N2	MCDChOK32PV1
1	206	AGCAGTTAAA.CCTCGTTTCT	C	T	0	0	0	0	0	0	0	0	0	0	0	1	0	0
1	290	TAACAGGGCA.ATATCCGGGT	A	G	0	0	0	0	0	0	0	0	0	0	1	1	0	1
1	332	ATCGTAAGGT.AAAAGAATAT	A	G	0	0	0	0	0	0	0	0	0	0	1	0	0	0
1	404	AAGAAACGCG.GTTTTTGGTG	G	T	0	1	1	0	0	0	0	0	0	0	0	0	1	0
1	413	GGTTTTTGGT.GAGTCATATT	G	A	0	0	0	0	0	0	0	0	0	0	1	0	0	0
1	470	TGAGTGATAA.CTGTGCATAT	C	T	0	0	0	0	0	0	0	0	0	0	0	0	0	1
1	476	ATAACTGTGC.ATATCGGTTA	A	G	0	0	0	0	0	0	0	0	0	0	0	0	0	1
1	488	ATCGGTTATT.GGGCTTAGTC	G	A	0	0	0	0	0	0	0	0	0	0	0	0	0	1
1	491	GGTTATTGGG.CTTAGTCGAT	C	T	0	0	0	0	0	0	0	0	0	0	0	1	0	0
1	584	TGCAACAACA.GGGACTCACT	G	A	0	0	0	0	0	0	0	0	0	0	1	0	1	1
1	593	AGGGACTCAC.TAAAGCTCCT	T	C	0	0	0	0	0	0	0	0	0	0	1	1	1	1
1	630	AGAAACTCAA.TTATTGGCCC	T	C	0	0	0	0	0	0	0	0	0	0	1	0	0	0
1	656	ACCAGCATGG.TGCATCTTTA	T	C	0	1	1	0	0	0	0	0	0	0	1	1	1	1
1	672	TTTAGCTAAA.GTTGCTCATC	G	A	0	0	0	0	0	0	0	0	0	0	1	0	0	1
1	707	CAATTAAAGA.GTCTTCGGAA	G	T	0	1	1	0	0	0	0	0	0	0	1	1	0	1
1	710	TTAAAGAGTC.TTCGGAAACA	T	G	0	1	1	0	0	0	0	0	0	0	0	0	0	0
1	788	TATATCTACA.GTTTATTGGT	G	A	0	0	0	0	0	0	0	0	0	0	0	0	0	1
1	797	AGTTTATTGG.TCGCAAAGTT	T	C	0	1	1	0	0	0	0	0	0	0	1	1	0	0
1	938	CACGTAATGT.CTCGCTAAAA	C	T	0	0	0	0	0	0	0	0	0	0	1	0	1	0
1	942	TAATGTCTCG.CTAAAACTGG	C	T	0	0	0	0	0	0	0	0	0	0	1	0	1	0
1	956	AACTGGGCGA.GGTGCAAGGT	G	A	0	0	0	0	0	0	0	0	0	0	1	0	1	0
1	971	AAGGTGACAA.GTTTATCGAG	G	A	0	0	0	0	0	0	0	0	0	0	1	0	1	0
1	992	TAGGTCATAG.ACAGGCTTAT	A	G	0	1	1	0	0	0	0	0	0	0	0	1	0	1
1	1019	TAATAGATCC.GCAGGGCGGA	G	A	0	1	1	0	0	0	0	0	0	0	0	0	0	1
1	1037	GATACCGTGC.CGGTACTCAA	C	T	0	1	1	0	0	0	0	0	0	0	1	0	1	1
1	1086	GCGAGATGAT.CATTTAAAAC	C	T	0	0	0	0	0	0	0	0	0	0	0	0	0	1
1	1102	AAACTAGAAC.ATCTTGATCT	A	G	0	1	1	0	0	0	0	0	0	0	1	0	1	1
1	1157	TTAAAACTCC.GCTGACTTGG	G	A	0	0	0	0	0	0	0	0	0	0	1	0	1	0
1	1208	TTCATGACGG.CGTTTATAAT	C	T	0	1	1	0	0	0	0	0	0	0	0	0	0	0
1	1216	GGCGTTTATA.ATGATGAAAA	A	G	0	1	1	0	0	0	0	0	0	0	1	1	1	1
1	1244	GCGTCGCGAG.TTTTAATGCT	T	C	0	0	0	0	0	0	0	0	0	0	0	0	0	1
1	1282	GCAGATTATG.AGCGTAAATA	A	C	0	1	1	0	0	0	0	0	0	0	0	0	0	0
1	1286	ATTATGAGCG.TAAATATATT	T	C	0	1	1	0	0	0	0	0	0	0	1	1	1	1
1	1290	TGAGCGTAAA.TATATTTGCT	T	C	0	1	1	0	0	0	0	0	0	0	1	1	1	1
1	1295	GTAAATATAT.TTGCTATGGG	T	C	0	0	0	0	0	0	0	0	0	0	0	0	1	0
1	1395	GAATCAGTGG.CTTGAAAAAT	C	T	0	1	1	0	0	0	0	0	0	0	1	0	1	0
1	1547	AAAATCATCT.GGACTGGATG	G	A	0	1	1	0	0	0	0	0	0	0	1	0	1	0
1	1550	ATCATCTGGA.CTGGATGAAA	C	T	0	1	1	0	0	0	0	0	0	0	1	0	1	0
1	1591	TTCTTTTAAA.CCATATACCT	C	G	0	1	1	0	0	0	0	0	0	0	0	0	0	0
1	1592	TCTTTTAAAC.CATATACCTA	C	A	0	1	1	0	0	0	0	0	0	0	0	0	0	0
1	1595	TTTAAACCAT.ATACCTATAA	A	G	0	0	0	0	0	0	0	0	0	0	1	0	0	0
1	1596	TTAAACCATA.TACCTATAAA	T	A	0	1	1	0	0	0	0	0	0	0	0	0	0	0
1	1597	TAAACCATAT.ACCTATAAAA	A	G	0	1	1	0	0	0	0	0	0	0	0	0	0	0
1	1598	AAACCATATA.CCTATAAAAA	C	T	0	1	1	0	0	0	0	0	0	0	0	0	0	0
1	1599	AACCATATAC.CTATAAAAAA	C	G	0	1	1	0	0	0	0	0	0	0	0	0	0	0
1	1600	ACCATATACC.TATAAAAAAT	T	C	0	1	1	0	0	0	0	0	0	0	0	0	0	0
1	1609	CTATAAAAAA.TAGAGAAATA	T	G,A	0	2	2	0	0	0	0	0	0	0	1	1	1	1
1	1618	ATAGAGAAAT.AGATGATGAC	A	G	0	1	1	0	0	0	0	0	0	0	0	0	0	0
1	1625	AATAGATGAT.GACTATTTCT	G	T	0	1	1	0	0	0	0	0	0	0	0	0	0	0
1	1628	AGATGATGAC.TATTTCTCTT	T	C	0	1	1	0	0	0	0	0	0	0	0	0	0	0
1	1643	CTCTTTTTTT.ATTTTAGGGA	A	G	0	1	1	0	0	0	0	0	0	0	0	0	0	1
1	1648	TTTTTATTTT.AGGGAAAAAT	A	T	0	1	1	0	0	0	0	0	0	0	0	0	0	1
1	1651	TTATTTTAGG.GAAAAATTAT	G	C	0	1	1	0	0	0	0	0	0	0	0	0	0	1
1	1652	TATTTTAGGG.AAAAATTATT	A	T	0	1	1	0	0	0	0	0	0	0	0	0	0	1
1	1662	AAAAATTATT.TCTTTATTGC	T	C	0	0	0	0	0	0	0	0	0	0	0	0	0	1
1	1673	CTTTATTGCA.TTCAGCACAG	T	C	0	0	0	0	0	0	0	0	0	0	0	0	1	0
1	1674	TTTATTGCAT.TCAGCACAGC	T	C	0	1	1	0	0	0	0	0	0	0	0	0	0	0
1	1675	TTATTGCATT.CAGCACAGCA	C	T	0	0	0	0	0	0	0	0	0	0	0	0	0	1
1	1677	ATTGCATTCA.GCACAGCATA	G	A	0	0	0	0	0	0	0	0	0	0	0	0	0	1
1	1678	TTGCATTCAG.CACAGCATAA	C	A	0	0	0	0	0	0	0	0	0	0	0	0	0	1
1	1681	CATTCAGCAC.AGCATAAGCT	A	T	0	0	0	0	0	0	0	0	0	0	0	0	0	1
1	1682	ATTCAGCACA.GCATAAGCTG	G	A	0	0	1	0	0	0	0	0	0	0	0	0	0	0
1	1687	GCACAGCATA.AGCTGCCTTA	A	C	0	0	0	0	0	0	0	0	0	0	0	0	0	1
1	1702	CCTTAATGCG.CTCTTCATTT	C	T	0	0	0	0	0	0	0	0	0	0	0	0	0	1
1	1741	ACATGACTAA.ACCAATATTT	A	G	0	1	1	0	0	0	0	0	0	0	0	0	0	0
1	1768	GAATAAACAC.CACATATGTT	C	T	0	1	1	0	0	0	0	0	0	0	1	0	0	0
1	1789	CGAAACCGTT.AGTTGAGCCA	A	G	0	1	1	0	0	0	0	0	0	0	0	1	1	1
1	1825	TAACTGAAGG.TTCCTTTGAA	T	C	0	0	0	0	0	0	0	0	0	0	1	0	0	0
1	1828	CTGAAGGTTC.CTTTGAAATA	C	T	0	0	0	0	0	0	0	0	0	0	1	1	1	1
1	1930	CTTCCCAACC.GAGTGCCTGA	G	A	0	0	1	0	0	0	0	0	0	0	1	1	1	0
1	1933	CCCAACCGAG.TGCCTGATAC	T	C	0	0	1	0	0	0	0	0	0	0	1	1	1	0
1	1936	AACCGAGTGC.CTGATACATG	C	T	0	0	1	0	0	0	0	0	0	0	1	1	1	0
1	1961	TACTTGATAG.CGACCCTGAT	C	A	0	1	0	0	0	0	0	0	0	0	0	0	0	0
1	1962	ACTTGATAGC.GACCCTGATG	G	A	0	1	0	0	0	0	0	0	0	0	0	0	0	0
1	1963	CTTGATAGCG.ACCCTGATGT	A	C	0	1	0	0	0	0	0	0	0	0	0	0	0	0
1	1966	GATAGCGACC.CTGATGTGTT	C	T	0	1	1	0	0	0	0	0	0	0	1	1	1	1
1	1987	CATTAATTGC.CCGTTGAATA	C	A	0	0	0	0	0	0	0	0	0	0	0	0	0	1
1	1999	GTTGAATATC.TGCTGGATAT	T	A	0	1	0	0	0	0	0	0	0	0	0	0	0	0
1	2001	TGAATATCTG.CTGGATATTT	C	T	0	0	1	0	0	0	0	0	0	0	1	1	1	1
1	2002	GAATATCTGC.TGGATATTTT	T	C	0	1	1	0	0	0	0	0	0	0	1	1	1	1
1	2011	CTGGATATTT.TTGTGGATTT	T	C	0	1	1	0	0	0	0	0	0	0	1	1	1	1
1	2017	ATTTTTGTGG.ATTTAGGTTG	A	G	0	1	1	0	0	0	0	0	0	0	1	1	1	1
1	2020	TTTGTGGATT.TAGGTTGGCA	T	A,C	0	1	1	0	0	0	0	0	0	0	1	1	1	2
1	2023	GTGGATTTAG.GTTGGCATGA	G	A	0	0	0	0	0	0	0	0	0	0	0	0	0	1
1	2038	CATGAATAAA.ACTCAACATG	A	C	0	0	0	0	0	0	0	0	0	0	0	0	0	1
1	2039	ATGAATAAAA.CTCAACATGT	C	T	0	0	0	0	0	0	0	0	0	0	0	0	0	1
1	2041	GAATAAAACT.CAACATGTCG	C	A,T	0	0	0	0	0	0	0	0	0	0	0	0	2	1
1	2043	ATAAAACTCA.ACATGTCGGG	A	G	0	0	0	0	0	0	0	0	0	0	0	0	0	1
1	2047	AACTCAACAT.GTCGGGTAGT	G	A	0	0	1	0	0	0	0	0	0	0	0	1	1	0
1	2050	TCAACATGTC.GGGTAGTGTC	G	C	0	0	1	0	0	0	0	0	0	0	0	1	1	0
1	2055	ATGTCGGGTA.GTGTCGATTT	G	A	0	0	1	0	0	0	0	0	0	0	0	1	1	0
1	2056	TGTCGGGTAG.TGTCGATTTG	T	G	0	0	1	0	0	0	0	0	0	0	0	1	1	0
1	2059	CGGGTAGTGT.CGATTTGACG	C	T,G	0	0	2	0	0	0	0	0	0	0	1	2	2	0
1	2071	ATTTGACGCC.ATATGCTGGG	A	G	0	0	1	0	0	0	0	0	0	0	1	1	1	0
1	2077	CGCCATATGC.TGGGGCATCG	T	A	0	1	0	0	0	0	0	0	0	0	0	0	0	0
1	2095	CGAGTGGGCC.GGGGTTAACT	G	A	0	0	1	0	0	0	0	0	0	0	0	0	0	0
1	2131	CTTGGTTATA.GCCAAAAGCA	G	A	0	1	0	0	0	0	0	0	0	0	0	0	0	0
1	2137	TATAGCCAAA.AGCATAGTTT	A	T	0	1	0	0	0	0	0	0	0	0	0	0	0	0
1	2152	AGTTTTGCAT.CTGGGTCTTA	C	T	0	0	1	0	0	0	0	0	0	0	1	1	1	1
1	2163	TGGGTCTTAG.GTACATTTAC	G	C	0	0	0	0	0	0	0	0	0	0	0	0	0	1
1	2220	TTTTCTAAGA.CTTGGTCGAA	C	G	0	0	0	0	0	0	0	0	0	0	1	0	0	0
1	2605	CAGATTGAAG.ACCATAATAC	A	G	0	0	0	0	0	0	0	0	0	0	1	0	0	0
1	2608	ATTGAAGACC.ATAATACATT	A	G	0	0	0	0	0	0	0	0	0	0	1	0	0	0
1	2615	ACCATAATAC.ATTTCATACT	A	G	0	0	0	0	0	0	0	0	0	0	1	0	0	0
1	2638	TATTATTTTG.AATAACACCC	A	G	0	0	0	0	0	0	0	0	0	0	1	0	0	0
1	2641	TATTTTGAAT.AACACCCACA	A	G	0	0	0	0	0	0	0	0	0	0	1	0	0	0
1	2644	TTTGAATAAC.ACCCACAGCC	A	G	0	0	0	0	0	0	0	0	0	0	1	0	0	0
1	2647	GAATAACACC.CACAGCCATA	C	A	0	0	0	0	0	0	0	0	0	0	1	0	0	0
1	2656	CCACAGCCAT.ACCTGGCACA	A	C	0	0	0	0	0	0	0	0	0	0	1	0	0	0
1	2659	CAGCCATACC.TGGCACATCA	T	G,C	0	0	0	0	0	0	0	0	0	0	1	2	0	0
1	2683	TTTCTAATAA.CGGTTTAAAG	C	T	0	0	0	0	0	0	0	0	0	0	0	1	0	0
1	2692	ACGGTTTAAA.GTTTTGATCT	G	A	0	0	1	0	0	0	0	0	0	0	1	1	1	0
1	2701	AGTTTTGATC.TACCAGTTTT	T	A	0	0	0	0	0	0	0	0	0	0	1	0	0	0
1	3102	TACACATATG.TGCTGAATCG	T	A	0	0	0	0	0	0	0	0	0	0	0	0	1	0
1	3114	CTGAATCGAT.GACTACAGCA	G	A	0	1	0	0	0	0	0	0	0	0	0	0	0	0
1	3123	TGACTACAGC.AACGCCACGA	A	G	0	1	0	0	0	0	0	0	0	0	1	1	0	1
1	3126	CTACAGCAAC.GCCACGAGCA	G	A	0	1	0	0	0	0	0	0	0	0	1	1	1	1
1	3129	CAGCAACGCC.ACGAGCACCA	A	G	0	1	0	0	0	0	0	0	0	0	1	1	1	1
1	3135	CGCCACGAGC.ACCAGTCACT	A	G	0	0	1	0	0	0	0	0	0	0	0	0	0	0
1	3136	GCCACGAGCA.CCAGTCACTT	C	T	0	1	0	0	0	0	0	0	0	0	0	0	0	0
1	3141	GAGCACCAGT.CACTTCTGCA	C	G	0	1	1	0	0	0	0	0	0	0	1	1	1	1
1	3150	TCACTTCTGC.AACAGCTTCA	A	G	0	0	0	0	0	0	0	0	0	0	0	0	1	0
1	3159	CAACAGCTTC.AGCGATTTGC	A	T	0	0	0	0	0	0	0	0	0	0	0	0	1	0
1	3168	CAGCGATTTG.CTGAGTAAGG	C	T	0	0	0	0	0	0	0	0	0	0	0	0	1	0
1	3174	TTTGCTGAGT.AAGGTTTTCC	A	C	0	1	0	0	0	0	0	0	0	0	1	1	1	1
1	3177	GCTGAGTAAG.GTTTTCCTGA	G	A	0	0	0	0	0	0	0	0	0	0	0	0	1	0
1	3198	TTTGCAAACG.ACGAGCAAAC	A	G	0	0	0	0	0	0	0	0	0	0	0	0	1	0
1	3219	TCTCGGTAAT.ACGTGCAAAT	A	T	0	0	0	0	0	0	0	0	0	0	0	0	1	0
1	3255	CTTTGCCTTC.TGGTAAATAG	T	C	0	0	0	0	0	0	0	0	0	0	0	0	1	0
1	3279	CATGAACACG.GCCATAGAAT	G	A	0	0	0	0	0	0	0	0	0	0	0	0	1	0
1	3282	GAACACGGCC.ATAGAATGGG	A	G	0	0	0	0	0	0	0	0	0	0	0	0	1	0
1	3294	AGAATGGGAG.AAGATGGTGT	A	G	0	0	0	0	0	0	0	0	0	0	0	0	1	0
1	3300	GGAGAAGATG.GTGTTCGCAG	G	A	0	1	1	0	0	0	0	0	0	0	1	1	1	1
1	3309	GGTGTTCGCA.GAGCGAATAA	G	A	0	0	0	0	0	0	0	0	0	0	0	0	1	0
1	3318	AGAGCGAATA.AAATTCAATA	A	G	0	0	0	0	0	0	0	0	0	0	0	0	1	0
1	3470	CCGGGACGAT.TAAGGTCTTC	T	C	0	0	0	0	0	0	0	0	0	0	0	0	1	0
1	3474	GACGATTAAG.GTCTTCACCG	G	A	0	0	0	0	0	0	0	0	0	0	0	0	1	0
1	3622	TTTGGTTTTT.CCGTACGCTT	C	G	0	0	0	0	0	0	0	0	0	0	0	0	1	0
1	3623	TTGGTTTTTC.CGTACGCTTG	C	T	0	0	0	0	0	0	0	0	0	0	1	1	0	0
1	3624	TGGTTTTTCC.GTACGCTTGA	G	T	0	0	0	0	0	0	0	0	0	0	0	0	0	1
1	3625	GGTTTTTCCG.TACGCTTGAT	T	C	0	0	0	0	0	0	0	0	0	0	0	0	1	0
1	3627	TTTTTCCGTA.CGCTTGATAA	C	A	0	0	0	0	0	0	0	0	0	0	0	0	1	0
1	3632	CCGTACGCTT.GATAAAAGAT	G	A	0	0	0	0	0	0	0	0	0	0	0	0	1	0
1	3663	ATGTTTTTTA.TCGTTAATAG	T	A	0	0	1	0	0	0	0	0	0	0	0	1	0	0
1	3709	CTTAATATTG.ATAAGTTCTA	A	G	0	0	0	0	0	0	0	0	0	0	0	0	1	0
1	3728	AAATGATCGC.CTAATGGCAT	C	G	0	0	0	0	0	0	0	0	0	0	0	0	1	0
1	3819	TCCGTGGTGG.TCAGCAGCAA	T	C	0	0	0	0	0	0	0	0	0	0	0	1	0	0
1	3827	GGTCAGCAGC.AAGTAGAAAA	A	T	0	1	0	0	0	0	0	0	0	0	0	0	0	0
1	3829	TCAGCAGCAA.GTAGAAAATA	G	T	0	0	0	0	0	0	0	0	0	0	1	0	0	0
1	3832	GCAGCAAGTA.GAAAATATAG	G	A	0	0	0	0	0	0	0	0	0	0	0	1	0	0
1	3837	AAGTAGAAAA.TATAGTACCC	T	C	0	0	0	0	0	0	0	0	0	0	0	1	0	0
1	3838	AGTAGAAAAT.ATAGTACCCA	A	G	0	1	1	0	0	0	0	0	0	0	1	1	1	0
1	3846	ATATAGTACC.CACAATGACG	C	T	0	1	1	0	0	0	0	0	0	0	1	1	1	0
1	3868	TTTACAATTT.CTGCGAGAAT	C	T	0	0	0	0	0	0	0	0	0	0	0	0	1	0
1	3882	GAGAATATAC.TCAAACTGGT	T	C	0	0	0	0	0	0	0	0	0	0	0	0	1	0
1	3966	TGATTGGTGA.ATTGGTCAAT	A	G	0	1	1	0	0	0	0	0	0	0	1	1	1	1
1	3993	TGCAATTACG.TAGTGTGAAT	T	C	0	0	0	0	0	0	0	0	0	0	0	0	1	0
1	4021	TCAGTTTTTA.CCAACTTTAG	C	G	0	0	0	0	0	0	0	0	0	0	0	0	1	0
1	4023	AGTTTTTACC.AACTTTAGAT	A	G	0	1	0	0	0	0	0	0	0	0	0	0	1	1
1	4038	TAGATGGTAA.AGCCTTATTT	A	G	0	0	1	0	0	0	0	0	0	0	1	1	0	0
1	4042	TGGTAAAGCC.TTATTTACAG	T	C	0	0	1	0	0	0	0	0	0	0	1	1	0	0
1	4077	GCTTATTGCC.TGTACAAGAT	T	A	0	0	1	0	0	0	0	0	0	0	1	1	0	1
1	4082	TTGCCTGTAC.AAGATGGCAC	A	C	0	0	1	0	0	0	0	0	0	0	1	1	0	1
1	4089	TACAAGATGG.CACACTTCAT	C	G	0	0	0	0	0	0	0	0	0	0	0	0	1	0
1	4101	CACTTCATCC.TGTACAACAG	T	G	0	0	1	0	0	0	0	0	0	0	1	1	1	1
1	4119	AGGCGATGGT.CGATATACAT	C	T	0	0	0	0	0	0	0	0	0	0	0	0	1	0
1	4125	TGGTCGATAT.ACATGGTTCA	A	G	0	1	1	0	0	0	0	0	0	0	1	1	1	1
1	4173	TCATGTCGTT.ATGGTCAATG	A	G	0	0	0	0	0	0	0	0	0	0	0	0	0	1
1	4185	GGTCAATGTA.TGAAAATGAA	T	C	0	1	0	0	0	0	0	0	0	0	1	0	1	0
1	4200	ATGAACAACA.GTCTCTAAGC	G	T	0	1	1	0	0	0	0	0	0	0	1	0	0	0
1	4205	CAACAGTCTC.TAAGCAAAGA	T	C	0	1	1	0	0	0	0	0	0	0	1	1	1	1
1	4209	AGTCTCTAAG.CAAAGATAAA	C	T	0	0	1	0	0	0	0	0	0	0	0	0	0	0
1	4242	TTTCTGGAAA.CTTATGTCGC	C	T	0	0	0	0	0	0	0	0	0	0	0	1	0	0
1	4245	CTGGAAACTT.ATGTCGCTGT	A	G	0	0	0	0	0	0	0	0	0	0	0	1	0	0
1	4254	TATGTCGCTG.TACAGGCTAT	T	C	0	0	0	0	0	0	0	0	0	0	0	1	0	0
1	4297	AAAAGCTTAT.GACTATCCAC	G	A	0	0	1	0	0	0	0	0	0	0	0	0	0	0
1	4311	ATCCACGTGT.GGTATTAGAA	G	T	0	0	1	0	0	0	0	0	0	0	0	0	1	0
1	4318	TGTGGTATTA.GAACGTCAAA	G	C	0	1	0	0	0	0	0	0	0	0	1	1	0	0
1	4323	TATTAGAACG.TCAAAAAGTA	T	C	0	0	0	0	0	0	0	0	0	0	0	1	0	0
1	4335	AAAAAGTAAT.TGATGTATTA	T	G	0	0	0	0	0	0	0	0	0	0	0	1	0	0
1	4355	AAAGAGATCA.GAACATTACC	G	A	0	1	1	0	0	0	0	0	0	0	1	1	0	0
1	4357	AGAGATCAGA.ACATTACCTG	A	G	0	1	1	0	0	0	0	0	0	0	1	1	0	0
1	4372	ACCTGCATTG.TATTTGAATG	T	C	0	1	1	0	0	0	0	0	0	0	1	1	1	0
1	4377	CATTGTATTT.GAATGATCAA	G	A	0	0	0	0	0	0	0	0	0	0	0	1	0	0
1	4381	GTATTTGAAT.GATCAAAAGC	G	A	0	0	0	0	0	0	0	0	0	0	0	1	0	0
1	4386	TGAATGATCA.AAAGCAGCAA	A	T	0	0	0	0	0	0	0	0	0	0	0	1	0	0
1	4388	AATGATCAAA.AGCAGCAATT	A	G	0	0	0	0	0	0	0	0	0	0	0	1	0	0
1	4389	ATGATCAAAA.GCAGCAATTT	G	T	0	0	0	0	0	0	0	0	0	0	0	1	0	0
1	4410	TTGCACCCAA.GACTTTGCAG	G	A	0	1	1	0	0	0	0	0	0	0	0	0	0	0
1	4428	AGGATTTTGC.TACTTTACGT	T	C	0	0	0	0	0	0	0	0	0	0	1	1	0	0
1	4429	GGATTTTGCT.ACTTTACGTT	A	G	0	0	0	0	0	0	0	0	0	0	1	1	0	0
1	4430	GATTTTGCTA.CTTTACGTTT	C	T	0	0	0	0	0	0	0	0	0	0	1	1	0	0
1	4431	ATTTTGCTAC.TTTACGTTTA	T	A	0	0	0	0	0	0	0	0	0	0	1	1	0	0
1	4437	CTACTTTACG.TTTACAGTTG	T	C	0	0	0	0	0	0	0	0	0	0	0	1	0	0
1	4441	TTTACGTTTA.CAGTTGCCGC	C	G	0	0	0	0	0	0	0	0	0	0	0	1	0	0
1	4470	TTGTTGCAGG.TAGCACAGAT	T	G	0	0	0	0	0	0	0	0	0	0	0	0	1	0
1	4482	GCACAGATGT.AGGTTTGTGG	A	C	0	0	0	0	0	0	0	0	0	0	1	1	1	0
1	4494	GTTTGTGGGT.AACAAAGCAG	A	C	0	0	0	0	0	0	0	0	0	0	0	1	0	0
1	4504	AACAAAGCAG.GGCCGTGATT	G	A	0	0	0	0	0	0	0	0	0	0	1	0	0	0
1	4510	GCAGGGCCGT.GATTTGGGCG	G	A	0	0	1	0	0	0	0	0	0	0	0	1	0	0
1	4524	TGGGCGATAT.GCTTTATATT	G	A	0	0	0	0	0	0	0	0	0	0	0	1	0	0
1	4533	TGCTTTATAT.TGGTCAAGTT	T	A,C	0	1	1	0	0	0	0	0	0	0	1	2	2	2
1	4551	TTGAAGAGCT.AAAAAAGATT	A	G	0	1	1	0	0	0	0	0	0	0	1	1	1	1
1	4558	GCTAAAAAAG.ATTGTAGTCA	A	G	0	0	0	0	0	0	0	0	0	0	0	0	0	1
1	4574	GTCACAGACC.TTGCTTTAAC	T	A	0	1	1	0	0	0	0	0	0	0	1	1	1	1
1	4577	ACAGACCTTG.CTTTAACGAT	C	T	0	0	0	0	0	0	0	0	0	0	1	0	0	0
1	4590	TAACGATTGG.GGCAAATGTA	G	A	0	0	0	0	0	0	0	0	0	0	0	0	1	1
1	4608	TAAGTTTGAG.CGATGCACTC	C	T	0	0	1	0	0	0	0	0	0	0	0	1	0	0
1	4639	AGATTTTTAT.CCCGATTTTC	C	T	0	0	0	0	0	0	0	0	0	0	0	0	1	0
1	4644	TTTATCCCGA.TTTTCAAGAA	T	C	0	0	1	0	0	0	0	0	0	0	0	1	1	1
1	4653	ATTTTCAAGA.ATTACAGCGC	A	G	0	0	0	0	0	0	0	0	0	0	0	0	0	1
1	4656	TTCAAGAATT.ACAGCGCCGT	A	G	0	0	1	0	0	0	0	0	0	0	0	1	1	0
1	4689	CGATTAAAAA.TGCAGGCACA	T	C	0	0	1	0	0	0	0	0	0	0	0	1	0	0
1	4695	AAAATGCAGG.CACACTAGGG	C	A	0	1	1	0	0	0	0	0	0	0	1	1	1	1
1	4698	ATGCAGGCAC.ACTAGGGGGA	A	T,G	0	0	2	0	0	0	0	0	0	0	0	2	1	0
1	4699	TGCAGGCACA.CTAGGGGGAA	C	T	0	0	0	0	0	0	0	0	0	0	0	0	1	0
1	4704	GCACACTAGG.GGGAAATATT	G	T	0	1	1	0	0	0	0	0	0	0	1	1	1	1
1	4716	GAAATATTGC.CAATGGTTCG	C	T	0	0	0	0	0	0	0	0	0	0	1	0	0	1
1	4728	ATGGTTCGCC.TATTGGTGAT	T	G	0	0	0	0	0	0	0	0	0	0	0	0	1	0
1	4734	CGCCTATTGG.TGATTCAATG	T	C	0	0	0	0	0	0	0	0	0	0	0	0	1	0
1	4746	ATTCAATGCC.GGCATTAATT	G	A	0	0	1	0	0	0	0	0	0	0	0	1	1	0
1	4758	CATTAATTAC.GCTAGGTACA	G	A	0	0	0	0	0	0	0	0	0	0	0	0	1	0
1	4762	AATTACGCTA.GGTACACGAT	G	T	0	0	0	0	0	0	0	0	0	0	0	0	0	1
1	4782	TGATTTTGCG.TGTAGGTAAG	T	C	0	1	0	0	0	0	0	0	0	0	0	0	0	0
1	4789	GCGTGTAGGT.AAGCAGACTC	A	G	0	1	1	0	0	0	0	0	0	0	1	1	1	1
1	4797	GTAAGCAGAC.TCGTGAAATT	T	C	0	1	0	0	0	0	0	0	0	0	0	0	1	0
1	4850	ACAGCATTAC.AACTTGGTGA	A	G	0	0	1	0	0	0	0	0	0	0	1	0	1	1
1	4851	CAGCATTACA.ACTTGGTGAG	A	G	0	1	0	0	0	0	0	0	0	0	0	1	0	0
1	4869	AGTTTGTTGA.GGCGATTGTT	G	A	0	0	1	0	0	0	0	0	0	0	1	0	0	1
1	4890	TTCCGCTTCG.TGAAGGGCAG	T	C	0	0	1	0	0	0	0	0	0	0	1	0	1	1
1	4938	TTGCCAAACG.ATTTGAGCAA	A	T	0	0	0	0	0	0	0	0	0	0	0	0	1	0
1	4971	TATGTGCAGC.TATTTCTTGT	T	C	0	0	1	0	0	0	0	0	0	0	1	0	1	1
1	4977	CAGCTATTTC.TTGTGAGTTA	T	A	0	0	0	0	0	0	0	0	0	0	0	0	1	0
1	4980	CTATTTCTTG.TGAGTTAGAT	T	C	0	0	0	0	0	0	0	0	0	0	0	0	1	0
1	4983	TTTCTTGTGA.GTTAGATAAT	G	T	0	0	0	0	0	0	0	0	0	0	0	0	1	0
1	5002	TGATGATGTC.ACTCACAATG	A	G	0	0	1	0	0	0	0	0	0	0	1	0	1	1
1	5005	TGATGTCACT.CACAATGTAA	C	T	0	1	0	0	0	0	0	0	0	0	0	0	0	0
1	5031	CTTTTGGTGG.CATGGCAGCT	C	T	0	1	1	0	0	0	0	0	0	0	1	1	1	1
1	5037	GTGGCATGGC.AGCTATTCCC	A	G	0	0	1	0	0	0	0	0	0	0	0	0	0	1
1	5046	CAGCTATTCC.CAAACGTGCA	C	T	0	0	0	0	0	0	0	0	0	0	0	0	1	0
1	5052	TTCCCAAACG.TGCAAAATAT	T	C	0	0	0	0	0	0	0	0	0	0	1	0	0	0
1	5062	TGCAAAATAT.GCAGAAGCCA	G	A	0	0	1	0	0	0	0	0	0	0	0	0	0	1
1	5076	AAGCCATATT.AGAAGGCCAG	A	G	0	0	0	0	0	0	0	0	0	0	0	0	1	0
1	5081	ATATTAGAAG.GCCAGCAAAT	G	A	0	0	1	0	0	0	0	0	0	0	0	0	0	1
1	5082	TATTAGAAGG.CCAGCAAATT	C	T	0	0	0	0	0	0	0	0	0	0	0	0	1	0
1	5089	AGGCCAGCAA.ATTACAGCAG	A	C	0	0	0	0	0	0	0	0	0	0	0	0	1	0
1	5106	CAGAATTGAT.CGTTCAGGCG	C	G	0	0	1	0	0	0	0	0	0	0	1	0	0	0
1	5107	AGAATTGATC.GTTCAGGCGC	G	A	0	0	1	0	0	0	0	0	0	0	1	0	0	0
1	5111	TTGATCGTTC.AGGCGCAGCA	A	T	0	0	0	0	0	0	0	0	0	0	0	0	1	0
1	5115	TCGTTCAGGC.GCAGCAGGCA	G	A	0	0	0	0	0	0	0	0	0	0	0	0	1	1
1	5118	TTCAGGCGCA.GCAGGCATTG	G	A	0	0	0	0	0	0	0	0	0	0	0	0	1	1
1	5119	TCAGGCGCAG.CAGGCATTGT	C	G	0	0	0	0	0	0	0	0	0	0	0	0	1	1
1	5124	CGCAGCAGGC.ATTGTCGCAA	A	C	0	0	0	0	0	0	0	0	0	0	0	0	1	0
1	5130	AGGCATTGTC.GCAAGACTAT	G	A	0	0	1	0	0	0	0	0	0	0	0	0	1	0
1	5131	GGCATTGTCG.CAAGACTATC	C	A	0	0	0	0	0	0	0	0	0	0	0	0	1	0
1	5160	ATGATGGACG.TGCTAGCTCA	T	G	0	0	0	0	0	0	0	0	0	0	1	0	0	0
1	5169	GTGCTAGCTC.AGCGTATCGT	A	G	0	1	0	0	0	0	0	0	0	0	0	1	1	0
1	5172	CTAGCTCAGC.GTATCGTTTA	G	A	0	1	0	0	0	0	0	0	0	0	1	1	1	0
1	5181	CGTATCGTTT.ACACGTCGCG	A	C	0	0	0	0	0	0	0	0	0	0	0	0	0	1
1	5188	TTTACACGTC.GCGAAAAACT	G	T	0	0	0	0	0	0	0	0	0	0	0	1	0	0
1	5203	AAACTGTTTA.AAGCGCTTTT	A	C	0	1	0	0	0	0	0	0	0	0	1	1	1	0
1	5208	GTTTAAAGCG.CTTTTATTTA	C	G,T	0	2	2	0	0	0	0	0	0	0	1	2	2	2
1	5215	GCGCTTTTAT.TTAGAAAAAA	T	A,G	0	2	2	0	0	0	0	0	0	0	1	2	2	2
1	5226	TAGAAAAAAT.TCTGTCTCAA	T	C	0	1	1	0	0	0	0	0	0	0	1	1	1	1
1	5238	TGTCTCAAAC.ACTCACTCGT	A	G	0	1	1	0	0	0	0	0	0	0	1	1	1	0
1	5239	GTCTCAAACA.CTCACTCGTG	C	A	0	1	1	0	0	0	0	0	0	0	1	1	1	0
1	5257	TGTGAATGAC.CTGATTGCTA	C	T	0	1	0	0	0	0	0	0	0	0	1	1	1	0
1	5262	ATGACCTGAT.TGCTATGGTG	T	C	0	1	0	0	0	0	0	0	0	0	1	1	1	0
1	5281	GGAGATCTAA.TATGAATCAA	T	C,A	0	2	0	0	0	0	0	0	0	0	0	2	1	0
1	5300	AACCATTGAC.TTAAATATTT	T	C	0	1	0	0	0	0	0	0	0	0	0	0	0	0
1	5332	CTAAAGCAGG.TGATTCGATT	T	C	0	1	1	0	0	0	0	0	0	0	0	0	1	1
1	5335	AAGCAGGTGA.TTCGATTCCA	T	C	0	1	1	0	0	0	0	0	0	0	0	0	1	1
1	5347	CGATTCCACA.CGAAAGTGCA	C	T	0	0	1	0	0	0	0	0	0	0	1	0	1	0
1	5350	TTCCACACGA.AAGTGCACAT	A	G	0	0	0	0	0	0	0	0	0	0	0	1	1	0
1	5353	CACACGAAAG.TGCACATTTA	T	C	0	0	0	0	0	0	0	0	0	0	0	1	1	0
1	5356	ACGAAAGTGC.ACATTTACAT	A	G	0	0	0	0	0	0	0	0	0	0	0	1	1	0
1	5365	CACATTTACA.TGTGACTGGG	T	C	0	0	0	0	0	0	0	0	0	0	0	0	1	0
1	5368	ATTTACATGT.GACTGGGCAG	G	A	0	0	0	0	0	0	0	0	0	0	0	0	1	0
1	5371	TACATGTGAC.TGGGCAGGCA	T	C,G	0	1	2	0	0	0	0	0	0	0	1	2	2	0
1	5381	TGGGCAGGCA.ACTTATATTG	A	G	0	0	0	0	0	0	0	0	0	0	1	0	0	0
1	5416	TTGAAAATAC.CATGCATTTG	C	A,G	0	0	1	0	0	0	0	0	0	0	0	2	0	1
1	5417	TGAAAATACC.ATGCATTTGG	A	C,T	0	0	2	0	0	0	0	0	0	0	0	2	0	1
1	5422	ATACCATGCA.TTTGGCAGTT	T	C	0	1	0	0	0	0	0	0	0	0	1	0	0	0
1	5423	TACCATGCAT.TTGGCAGTTG	T	C	0	1	0	0	0	0	0	0	0	0	1	0	0	0
1	5425	CCATGCATTT.GGCAGTTGGA	G	A	0	1	0	0	0	0	0	0	0	0	1	0	0	0
1	5428	TGCATTTGGC.AGTTGGATTT	A	T,G	0	1	0	0	0	0	0	0	0	0	1	0	2	0
1	5431	ATTTGGCAGT.TGGATTTTCA	T	C	0	1	1	0	0	0	0	0	0	0	1	1	1	0
1	5437	CAGTTGGATT.TTCAAATTGT	T	C	0	0	1	0	0	0	0	0	0	0	0	1	0	0
1	5440	TTGGATTTTC.AAATTGTGCC	A	G	0	0	1	0	0	0	0	0	0	0	0	1	0	0
1	5442	GGATTTTCAA.ATTGTGCCAA	A	G	0	0	0	0	0	0	0	0	0	0	0	0	1	0
1	5455	GTGCCAAAGG.CAAAATCAGT	C	T	0	0	0	0	0	0	0	0	0	0	0	0	1	0
1	5476	AGTTTGATTT.GGATGCAGTA	G	A	0	0	1	0	0	0	0	0	0	0	0	1	0	0
1	5491	CAGTACGTCA.AGCTGATGGT	A	G	0	1	1	0	0	0	0	0	0	0	1	1	1	1
1	5494	TACGTCAAGC.TGATGGTGTC	T	A,C	0	0	0	0	0	0	0	0	0	0	0	2	0	1
1	5497	GTCAAGCTGA.TGGTGTCCAT	T	A,G	0	2	1	0	0	0	0	0	0	0	1	0	1	1
1	5500	AAGCTGATGG.TGTCCATGCA	T	C	0	0	0	0	0	0	0	0	0	0	0	1	0	0
1	5503	CTGATGGTGT.CCATGCAGTT	C	T	0	1	1	0	0	0	0	0	0	0	0	0	1	0
1	5504	TGATGGTGTC.CATGCAGTTT	C	T	0	1	1	0	0	0	0	0	0	0	0	0	1	0
1	5518	CAGTTTTTTC.TGCAAAAGAT	T	G	0	1	1	0	0	0	0	0	0	0	1	1	1	1
1	5524	TTTCTGCAAA.AGATATTGAG	A	G	0	1	1	0	0	0	0	0	0	0	1	0	1	1
1	5551	ATAATTGGGG.GCCAATTGTT	G	A	0	1	1	0	0	0	0	0	0	0	0	1	0	0
1	5554	ATTGGGGGCC.AATTGTTAAA	A	G,C	0	0	0	0	0	0	0	0	0	0	1	2	1	1
1	5560	GGCCAATTGT.TAAAGATGAT	T	A	0	1	1	0	0	0	0	0	0	0	0	0	0	0
1	5569	TTAAAGATGA.TCCAATTTTT	T	C	0	1	1	0	0	0	0	0	0	0	1	1	1	1
1	5584	TTTTTGCCGA.GGAACAGGTT	G	A	0	1	1	0	0	0	0	0	0	0	1	0	1	1
1	5587	TTGCCGAGGA.ACAGGTTGAG	A	G	0	1	1	0	0	0	0	0	0	0	1	0	1	1
1	5593	AGGAACAGGT.TGAGTTTTAT	T	C	0	1	1	0	0	0	0	0	0	0	1	0	0	1
1	5596	AACAGGTTGA.GTTTTATGGA	G	A	0	1	1	0	0	0	0	0	0	0	1	0	0	1
1	5611	ATGGACAAGC.CTTGTTTGTG	C	T	0	0	0	0	0	0	0	0	0	0	0	0	1	0
1	5614	GACAAGCCTT.GTTTGTGGTT	G	A	0	1	1	0	0	0	0	0	0	0	0	0	1	1
1	5620	CCTTGTTTGT.GGTTGTGGCC	G	C	0	0	0	0	0	0	0	0	0	0	0	0	0	1
1	5623	TGTTTGTGGT.TGTGGCCGAG	T	C	0	1	1	0	0	0	0	0	0	0	1	0	0	0
1	5626	TTGTGGTTGT.GGCCGAGAGT	G	T	0	1	1	0	0	0	0	0	0	0	1	0	1	1
1	5629	TGGTTGTGGC.CGAGAGTTAT	C	T	0	1	0	0	0	0	0	0	0	0	0	0	1	1
1	5634	GTGGCCGAGA.GTTATCAGCA	G	C	0	0	0	0	0	0	0	0	0	0	0	0	1	0
1	5647	ATCAGCAAGC.CCGTCAGGCA	C	T	0	0	0	0	0	0	0	0	0	0	0	0	1	0
1	5651	GCAAGCCCGT.CAGGCAGTTC	C	A	0	0	0	0	0	0	0	0	0	0	0	0	1	0
1	5662	AGGCAGTTCG.CTTAGCAAAA	C	T	0	0	1	0	0	0	0	0	0	0	0	0	0	0
1	5665	CAGTTCGCTT.AGCAAAAATT	A	G	0	1	0	0	0	0	0	0	0	0	0	0	0	0
1	5669	TCGCTTAGCA.AAAATTGAGT	A	C	0	0	0	0	0	0	0	0	0	0	0	0	1	0
1	5686	AGTATGTGCC.CGAAACCCCA	C	T	0	1	0	0	0	0	0	0	0	0	0	0	1	0
1	5688	TATGTGCCCG.AAACCCCAAT	A	G	0	1	0	0	0	0	0	0	0	0	0	0	0	0
1	5692	TGCCCGAAAC.CCCAATTTTA	C	T	0	1	1	0	0	0	0	0	0	0	1	0	0	1
1	5695	CCGAAACCCC.AATTTTAACG	A	G	0	1	1	0	0	0	0	0	0	0	1	0	1	0
1	5716	TTCAAGATGC.GATTAAAAAA	G	A	0	0	1	0	0	0	0	0	0	0	1	0	0	0
1	5720	AGATGCGATT.AAAAAAGAAT	A	G	0	1	0	0	0	0	0	0	0	0	0	0	1	1
1	5731	AAAAAGAATC.GTGGGTGTTG	G	A	0	1	0	0	0	0	0	0	0	0	0	0	0	1
1	5740	CGTGGGTGTT.GCCGCCTGTT	G	A	0	0	1	0	0	0	0	0	0	0	1	0	0	0
1	5743	GGGTGTTGCC.GCCTGTTGAA	G	A	0	0	1	0	0	0	0	0	0	0	1	0	0	0
1	5773	GTGAAGTTGA.GCAGGCATTT	G	A	0	1	0	0	0	0	0	0	0	0	0	0	0	1
1	5776	AAGTTGAGCA.GGCATTTCAA	G	A	0	0	1	0	0	0	0	0	0	0	1	0	1	0
1	5788	CATTTCAAAA.CGCAGCACAT	C	T	0	1	1	0	0	0	0	0	0	0	1	0	1	1
1	5794	AAAACGCAGC.ACATCAACTT	A	T,C	0	2	1	0	0	0	0	0	0	0	1	0	2	2
1	5821	CTATTGAGCT.GGGTGGGCAA	G	A	0	1	0	0	0	0	0	0	0	0	0	0	0	1
1	5824	TTGAGCTGGG.TGGGCAAGAG	T	C	0	1	0	0	0	0	0	0	0	0	0	0	0	1
1	5843	GCATTTTTAT.CTTGAAGGGC	C	T	0	0	0	0	0	0	0	0	0	0	0	0	1	0
1	5845	ATTTTTATCT.TGAAGGGCAA	T	A	0	0	0	0	0	0	0	0	0	0	0	0	1	0
1	5851	ATCTTGAAGG.GCAAATTTCC	G	T	0	0	0	0	0	0	0	0	0	0	0	0	1	0
1	5854	TTGAAGGGCA.AATTTCCTAT	A	G	0	0	0	0	0	0	0	0	0	0	0	0	1	0
1	5887	AAAATCAGAG.CTTAAAAGTC	C	T	0	1	1	0	0	0	0	0	0	0	0	0	0	1
1	5905	TCTATTGCTC.GACACAACAT	G	A	0	0	0	0	0	0	0	0	0	0	0	1	0	0
1	5908	ATTGCTCGAC.ACAACATCCA	A	G	0	0	0	0	0	0	0	0	0	0	0	1	0	0
1	5911	GCTCGACACA.ACATCCAACC	A	G	0	0	0	0	0	0	0	0	0	0	1	0	0	0
1	5930	CGAAATGCAG.TTACTGATTT	T	C	0	0	0	0	0	0	0	0	0	0	0	1	0	0
1	5932	AAATGCAGTT.ACTGATTTGT	A	G	0	0	0	0	0	0	0	0	0	0	0	1	0	0
1	5933	AATGCAGTTA.CTGATTTGTC	C	T	0	0	0	0	0	0	0	0	0	0	1	0	0	0
1	5948	TTGTCATGCA.TTAGGCATGA	T	C	0	0	0	0	0	0	0	0	0	0	0	1	0	0
1	5971	TGCATCAGGT.CAGCGTGGAA	C	G	0	0	1	0	0	0	0	0	0	0	1	1	0	0
1	5974	ATCAGGTCAG.CGTGGAAAGT	C	T	0	0	1	0	0	0	0	0	0	0	1	1	1	1
1	5980	TCAGCGTGGA.AAGTCGCCGT	A	G	0	0	0	0	0	0	0	0	0	0	0	0	1	0
1	5983	GCGTGGAAAG.TCGCCGTATG	T	C	0	0	1	0	0	0	0	0	0	0	1	1	0	1
1	5995	GCCGTATGGG.TGGCGGTTTT	T	C	0	0	0	0	0	0	0	0	0	0	0	1	0	0
1	5998	GTATGGGTGG.CGGTTTTGGT	C	T	0	0	1	0	0	0	0	0	0	0	1	1	0	1
1	6007	GCGGTTTTGG.TGGTAAAGAG	T	C	0	0	0	0	0	0	0	0	0	0	1	0	0	0
1	6019	GTAAAGAGTC.ACAGTCAGCG	A	G	0	0	0	0	0	0	0	0	0	0	0	1	0	0
1	6025	AGTCACAGTC.AGCGCAGTGG	A	G	0	0	1	0	0	0	0	0	0	0	1	1	0	1
1	6028	CACAGTCAGC.GCAGTGGGCA	G	A	0	0	0	0	0	0	0	0	0	0	0	1	0	0
1	6040	AGTGGGCATG.CATTGCATCT	C	T	0	1	0	0	0	0	0	0	0	0	0	0	0	0
1	6046	CATGCATTGC.ATCTTTGGCA	A	C	0	1	0	0	0	0	0	0	0	0	0	0	1	0
1	6058	CTTTGGCAGC.AAAAAAAACG	A	G	0	0	0	0	0	0	0	0	0	0	0	0	0	1
1	6059	TTTGGCAGCA.AAAAAAACGG	A	C	0	1	0	0	0	0	0	0	0	0	1	1	1	0
1	6067	CAAAAAAAAC.GGGCCGTCCG	G	A,T	0	2	0	0	0	0	0	0	0	0	0	1	0	1
1	6070	AAAAAACGGG.CCGTCCGTGT	C	T	0	0	0	0	0	0	0	0	0	0	0	0	0	1
1	6076	CGGGCCGTCC.GTGTAAATTA	G	A	0	0	1	0	0	0	0	0	0	0	1	0	0	1
1	6101	AGATCGTGAT.GATGACATGA	G	A	0	0	1	0	0	0	0	0	0	0	0	0	0	0
1	6130	GCAAACGTCA.CGGTTTTGCT	C	T	0	0	0	0	0	0	0	0	0	0	1	0	0	0
1	6154	AGTGGTCTGT.AGCTTTTGAT	A	G	0	1	1	0	0	0	0	0	0	0	0	0	1	0
1	6168	TTTGATGACA.CTGGTATTTT	C	G	0	1	0	0	0	0	0	0	0	0	0	1	0	1
1	6173	TGACACTGGT.ATTTTGCAAG	A	G	0	1	0	0	0	0	0	0	0	0	0	1	0	1
1	6176	CACTGGTATT.TTGCAAGGCT	T	C	0	0	0	0	0	0	0	0	0	0	0	1	0	1
1	6184	TTTTGCAAGG.CTTAAAGGTG	C	T	0	0	0	0	0	0	0	0	0	0	0	1	0	0
1	6193	GCTTAAAGGT.GCAATTGGCT	G	A,T	0	1	1	0	0	0	0	0	0	0	1	1	2	1
1	6197	AAAGGTGCAA.TTGGCTTCAA	T	C	0	1	1	0	0	0	0	0	0	0	1	1	0	1
1	6208	TGGCTTCAAA.CTGTGGTTTT	C	T	0	0	0	0	0	0	0	0	0	0	0	1	0	0
1	6211	CTTCAAACTG.TGGTTTTTCG	T	C	0	0	0	0	0	0	0	0	0	0	0	0	0	1
1	6235	ATCTTTCTGG.GCCAGTGAAT	G	A	0	0	0	0	0	0	0	0	0	0	0	1	0	0
1	6250	TGAATGAACG.TGCGATTTGC	T	A	0	0	0	0	0	0	0	0	0	0	0	1	0	0
1	6271	ATATTGGCAA.TGCCTATTAT	T	C	0	0	1	0	0	0	0	0	0	0	1	0	0	1
1	6274	TTGGCAATGC.CTATTATCTA	C	T	0	0	1	0	0	0	0	0	0	0	1	0	0	1
1	6307	TACGTAACTT.ACGTTGTAAA	A	G	0	1	0	0	0	0	0	0	0	0	0	0	0	0
1	6318	CGTTGTAAAA.CCAATACTGT	C	A	0	0	0	0	0	0	0	0	0	0	0	0	0	1
1	6319	GTTGTAAAAC.CAATACTGTT	C	T	0	1	0	0	0	0	0	0	0	0	0	0	0	0
1	6331	ATACTGTTTC.CAATACGGCA	C	T	0	0	0	0	0	0	0	0	0	0	1	0	0	0
1	6403	ATGACATTGC.TCGTTATTTA	T	G	0	1	1	0	0	0	0	0	0	0	0	0	0	0
1	6418	ATTTAGGTTG.TGATCCAGTT	T	C	0	0	1	0	0	0	0	0	0	0	0	1	1	1
1	6424	GTTGTGATCC.AGTTGAAATT	A	G	0	0	1	0	0	0	0	0	0	0	1	1	1	1
1	6436	TTGAAATTCG.TCAGCGCAAT	T	A	0	0	0	0	0	0	0	0	0	0	1	0	0	0
1	6442	TTCGTCAGCG.CAATTTCTTT	C	T	0	0	0	0	0	0	0	0	0	0	1	0	0	0
1	6466	AGCAGCCCGG.TGGTGGACGT	T	C	0	0	0	0	0	0	0	0	0	0	0	0	1	0
1	6467	GCAGCCCGGT.GGTGGACGTG	G	A	0	0	1	0	0	0	0	0	0	0	0	0	0	0
1	6468	CAGCCCGGTG.GTGGACGTGA	G	C	0	0	0	0	0	0	0	0	0	0	0	0	1	0
1	6469	AGCCCGGTGG.TGGACGTGAC	T	G	0	0	1	0	0	0	0	0	0	0	0	1	0	1
1	6478	GTGGACGTGA.CCGTATGCAC	C	T	0	0	1	0	0	0	0	0	0	0	0	1	0	1
1	6500	TGGGGCAGAA.GTCCGTGATA	G	A	0	0	1	0	0	0	0	0	0	0	0	0	0	0
1	6527	GCCAAAATTG.GTAGCCGAAC	G	A	0	0	0	0	0	0	0	0	0	0	0	0	0	1
1	6532	AATTGGTAGC.CGAACTATTG	C	T	0	0	0	0	0	0	0	0	0	0	0	1	0	0
1	6536	GGTAGCCGAA.CTATTGCAAA	C	T	0	0	1	0	0	0	0	0	0	0	0	0	0	0
1	6557	TAGTGATTAC.GCGAAGCGTA	G	A	0	0	0	0	0	0	0	0	0	0	0	0	1	0
1	6576	AGACAGACTA.TTCATGCCTT	T	C	0	0	1	0	0	0	0	0	0	0	0	0	0	0
1	6595	TTAATCAGAA.CAATGACATC	C	T	0	0	0	0	0	0	0	0	0	0	0	0	1	0
1	6628	TTGCGTTAAC.CCCATTAATG	C	A	0	1	0	0	0	0	0	0	0	0	0	0	0	0
1	6640	CATTAATGTT.TGGTATTTCA	T	C	0	1	0	0	0	0	0	0	0	0	0	0	0	0
1	6649	TTGGTATTTC.ATTTAACGCC	A	G	0	0	0	0	0	0	0	0	0	0	1	0	1	0
1	6658	CATTTAACGC.CGTGCATTAC	C	T	0	0	1	0	0	0	0	0	0	0	0	1	0	1
1	6676	ACAATCAGGC.AGGTGCACTG	A	G	0	0	0	0	0	0	0	0	0	0	0	1	0	0
1	6691	CACTGGTCTA.TGTGTATATG	T	C	0	0	0	0	0	0	0	0	0	0	0	1	0	0
1	6697	TCTATGTGTA.TATGGATGGT	T	C	0	1	0	0	0	0	0	0	0	0	1	0	0	0
1	6706	ATATGGATGG.TACTGTCGCG	T	C	0	1	0	0	0	0	0	0	0	0	0	1	1	0
1	6712	ATGGTACTGT.CGCGATTACA	C	T	0	0	0	0	0	0	0	0	0	0	1	1	0	0
1	6721	TCGCGATTAC.ACATGGTGGT	A	G	0	0	0	0	0	0	0	0	0	0	1	1	0	0
1	6724	CGATTACACA.TGGTGGTACA	T	C	0	1	0	0	0	0	0	0	0	0	1	1	0	0
1	6766	CCAAAGTACG.GCAGGTTGCT	G	T	0	0	0	0	0	0	0	0	0	0	1	1	0	0
1	6770	AGTACGGCAG.GTTGCTGCAC	G	A	0	0	0	0	0	0	0	0	0	0	1	1	0	0
1	6796	TGGGTTTACC.CATCGATAGC	C	A	0	1	0	0	0	0	0	0	0	0	1	1	0	0
1	6799	GTTTACCCAT.CGATAGCGTT	C	T	0	0	0	0	0	0	0	0	0	0	1	1	0	0
1	6805	CCATCGATAG.CGTTCGTTTA	C	T	0	0	0	0	0	0	0	0	0	0	1	1	0	0
1	6806	CATCGATAGC.GTTCGTTTAA	G	A	0	0	0	0	0	0	0	0	0	0	1	1	0	0
1	6823	TAATTGCAAC.CGATACTTCT	C	T	0	0	0	0	0	0	0	0	0	0	1	0	0	0
1	6838	CTTCTCGTGT.GCCAAATACT	G	A	0	0	1	0	0	0	0	0	0	0	1	1	0	0
1	6878	TGGCGCAGAT.CTAAACGGTA	C	T	0	0	1	0	0	0	0	0	0	0	0	0	0	0
1	6883	CAGATCTAAA.CGGTAAAGCT	C	T	0	0	1	0	0	0	0	0	0	0	0	0	0	0
1	6901	CTGTTCAAAA.TGCCTGTATT	T	C	0	0	1	0	0	0	0	0	0	0	0	0	0	0
1	6931	AGCGTCTGGC.AAAACTTGCA	A	T	0	0	0	0	0	0	0	0	0	0	1	1	0	0
1	6942	AAACTTGCAG.CCGAAATAAG	C	T	0	1	0	0	0	0	0	0	0	0	0	0	0	0
1	6943	AACTTGCAGC.CGAAATAAGT	C	A	0	0	1	0	0	0	0	0	0	0	0	0	0	0
1	6946	TTGCAGCCGA.AATAAGTCAA	A	C	0	0	1	0	0	0	0	0	0	0	0	0	0	0
1	6952	CCGAAATAAG.TCAAAGTGAA	T	C	0	0	1	0	0	0	0	0	0	0	0	0	0	0
1	6953	CGAAATAAGT.CAAAGTGAAG	C	G	0	0	1	0	0	0	0	0	0	0	0	0	0	0
1	6955	AAATAAGTCA.AAGTGAAGCT	A	T	0	0	1	0	0	0	0	0	0	0	0	0	0	0
1	6961	GTCAAAGTGA.AGCTGACCAA	A	C	0	0	1	0	0	0	0	0	0	0	0	0	0	0
1	6964	AAAGTGAAGC.TGACCAAGTC	T	A	0	0	1	0	0	0	0	0	0	0	0	0	0	0
1	6966	AGTGAAGCTG.ACCAAGTCCA	A	G	0	0	1	0	0	0	0	0	0	0	0	0	0	0
1	6967	GTGAAGCTGA.CCAAGTCCAG	C	G	0	0	1	0	0	0	0	0	0	0	0	0	0	0
1	6969	GAAGCTGACC.AAGTCCAGTT	A	T	0	0	1	0	0	0	0	0	0	0	0	0	0	0
1	6994	ATAGTATGGT.TTCAACAGCG	T	C	0	0	1	0	0	0	0	0	0	0	0	0	0	0
1	6995	TAGTATGGTT.TCAACAGCGA	T	A	0	0	1	0	0	0	0	0	0	0	0	0	0	0
1	7003	TTTCAACAGC.GAATGGTCAT	G	C	0	0	0	0	0	0	0	0	0	0	1	1	0	0
1	7009	CAGCGAATGG.TCATTCATGG	T	C	0	0	0	0	0	0	0	0	0	0	1	1	1	0
1	7010	AGCGAATGGT.CATTCATGGA	C	T	0	0	0	0	0	0	0	0	0	0	1	1	0	0
1	7039	ACTTGGTTCA.ACGGGCATAT	A	G	0	0	0	0	0	0	0	0	0	0	1	1	0	0
1	7072	AACTATGGGA.TAGTGGTTTT	T	C	0	1	1	0	0	0	0	0	0	0	1	1	1	0
1	7075	TATGGGATAG.TGGTTTTTAT	T	C	0	0	1	0	0	0	0	0	0	0	0	0	0	0
1	7090	TTTATAAAAC.GCCAGAAATT	G	A	0	1	0	0	0	0	0	0	0	0	0	1	1	0
1	7102	CAGAAATTCA.CTATGATCAG	C	T	0	1	0	0	0	0	0	0	0	0	0	0	0	0
1	7123	TCAACCATTT.AGGGCGTCCA	A	G	0	0	0	0	0	0	0	0	0	0	1	0	0	0
1	7156	CCTATGGTGC.AGCGGTTAGC	A	G	0	1	1	0	0	0	0	0	0	0	0	0	1	0
1	7159	ATGGTGCAGC.GGTTAGCGAG	G	A	0	1	1	0	0	0	0	0	0	0	0	0	1	0
1	7165	CAGCGGTTAG.CGAGGTCGCA	C	T	0	1	1	0	0	0	0	0	0	0	1	1	1	0
1	7192	CCTTAACTGG.GGAAATGAAA	G	A	0	1	0	0	0	0	0	0	0	0	0	0	1	0
1	7199	TGGGGAAATG.AAAGTATTAC	A	C	0	0	0	0	0	0	0	0	0	0	0	0	1	0
1	7213	TATTACGTGC.TGACATTTTG	T	C	0	1	1	0	0	0	0	0	0	0	1	1	1	0
1	7228	TTTTGCATGA.CGTTGGGCAG	C	T	0	0	0	0	0	0	0	0	0	0	1	0	0	0
1	7231	TGCATGACGT.TGGGCAGTCA	T	C	0	1	1	0	0	0	0	0	0	0	1	1	1	0
1	7236	GACGTTGGGC.AGTCAATTAA	A	G	0	1	1	0	0	0	0	0	0	0	1	1	1	0
1	7264	TTGATATTGG.GCAAATTGAA	G	A	0	0	1	0	0	0	0	0	0	0	1	1	1	0
1	7276	AAATTGAAGG.TGGGTTTGTG	T	C	0	1	1	0	0	0	0	0	0	0	1	1	1	0
1	7297	AAGGGATGGG.ATGGCTCACG	A	G	0	1	1	0	0	0	0	0	0	0	1	0	1	0
1	7330	ATTGGCAGCC.GCAGGGTCCA	G	A	0	0	0	0	0	0	0	0	0	0	1	0	0	0
1	7336	AGCCGCAGGG.TCCACACGCA	T	G	0	1	1	0	0	0	0	0	0	0	1	0	1	0
1	7340	GCAGGGTCCA.CACGCAGGCC	C	T	0	0	1	0	0	0	0	0	0	0	0	0	0	0
1	7351	ACGCAGGCCG.ATTATTTACC	A	T	0	1	1	0	0	0	0	0	0	0	1	0	1	0
1	7354	CAGGCCGATT.ATTTACCCAT	A	G	0	1	1	0	0	0	0	0	0	0	1	0	1	0
1	7402	GTGTGGACAT.TCCTCATATT	T	A	0	0	1	0	0	0	0	0	0	0	0	0	0	0
1	7417	ATATTTTTAA.TGTCAAACTA	T	C	0	0	1	0	0	0	0	0	0	0	0	0	0	0
1	7426	ATGTCAAACT.ATTTAATAAT	A	G	0	1	1	0	0	0	0	0	0	0	0	1	1	0
1	7435	TATTTAATAA.TCAAAATCAG	T	C	0	1	0	0	0	0	0	0	0	0	0	1	0	0
1	7441	ATAATCAAAA.TCAGGCAGAC	T	C	0	0	0	0	0	0	0	0	0	0	0	0	1	0
1	7459	ACACCATCTA.TCGCTCTAAA	T	C	0	1	0	0	0	0	0	0	0	0	0	0	0	0
1	7465	TCTATCGCTC.TAAAGCGGTA	T	C	0	1	0	0	0	0	0	0	0	0	0	0	0	0
1	7471	GCTCTAAAGC.GGTAGGTGAA	G	T	0	1	0	0	0	0	0	0	0	0	0	0	0	0
1	7493	GCCATTTATG.TTGGCATTAT	T	C	0	0	0	0	0	0	0	0	0	0	0	1	0	0
1	7504	TGGCATTATC.GGTTTTCTCT	G	T	0	0	0	0	0	0	0	0	0	0	0	1	0	0
1	7528	TTCGTCAGGC.AGTACAGGCG	A	G	0	0	0	0	0	0	0	0	0	0	0	1	0	0
1	7537	CAGTACAGGC.GGCTATTCCA	G	A	0	0	1	0	0	0	0	0	0	0	0	0	0	0
1	7546	CGGCTATTCC.AGAAAATGCA	A	C	0	0	0	0	0	0	0	0	0	0	0	1	0	0
1	7552	TTCCAGAAAA.TGCACCGCTC	T	A	0	0	0	0	0	0	0	0	0	0	0	1	0	0
1	7555	CAGAAAATGC.ACCGCTCGTA	A	T	0	0	0	0	0	0	0	0	0	0	0	1	0	0
1	7564	CACCGCTCGT.ACTCAATGCT	A	G	0	0	0	0	0	0	0	0	0	0	0	1	0	0
1	7565	ACCGCTCGTA.CTCAATGCTC	C	T	0	0	0	0	0	0	0	0	0	0	0	0	1	0
1	7576	TCAATGCTCC.GGCAACTCCC	G	A	0	0	0	0	0	0	0	0	0	0	0	1	0	0
1	7583	TCCGGCAACT.CCCGAGGAAA	C	G	0	1	1	0	0	0	0	0	0	0	0	1	1	0
1	7588	CAACTCCCGA.GGAAATTTTA	G	A	0	0	0	0	0	0	0	0	0	0	0	1	0	0
1	7606	TACGTGCAAT.TGCTATTGGA	T	C	0	0	0	0	0	0	0	0	0	0	0	0	1	0
1	7609	GTGCAATTGC.TATTGGACGG	T	G	0	0	1	0	0	0	0	0	0	0	0	1	1	0
1	7616	TGCTATTGGA.CGGGGACAAG	C	G,T	0	0	0	0	0	0	0	0	0	0	0	0	2	1
1	7633	AAGCTTTGGC.TGCTCGCCCA	T	A	0	0	0	0	0	0	0	0	0	0	0	0	1	0
1	7635	GCTTTGGCTG.CTCGCCCACA	C	A	0	0	0	0	0	0	0	0	0	0	0	0	1	0
1	7638	TTGGCTGCTC.GCCCACAGGC	G	A	0	0	0	0	0	0	0	0	0	0	0	1	0	0
1	7714	AAGCCGATGC.GTTGCCTATG	G	T	0	0	0	0	0	0	0	0	0	0	0	0	1	0
1	7715	AGCCGATGCG.TTGCCTATGG	T	C	0	0	0	0	0	0	0	0	0	0	0	0	1	0
1	7720	ATGCGTTGCC.TATGGTATTA	T	A	0	0	0	0	0	0	0	0	0	0	0	0	1	0
1	7729	CTATGGTATT.AGTCACAGTG	A	G	0	0	0	0	0	0	0	0	0	0	0	0	1	0
1	7747	TGGTCCGTGC.TGATGGTTCA	T	A	0	1	1	0	0	0	0	0	0	0	0	0	0	1
1	7756	CTGATGGTTC.AACACCACGA	A	T	0	0	0	0	0	0	0	0	0	0	0	0	1	0
1	7759	ATGGTTCAAC.ACCACGAGAG	A	G	0	0	0	0	0	0	0	0	0	0	0	0	1	0
1	7786	CAACGATGTT.GTTGCGATTT	G	A	0	0	0	0	0	0	0	0	0	0	0	0	1	0
1	7792	TGTTGTTGCG.ATTTAATTTG	A	G	0	0	0	0	0	0	0	0	0	0	0	0	1	0
1	7816	AGCAATGGCA.GCAGTCAGAT	G	A	0	0	0	0	0	0	0	0	0	0	0	1	0	0
1	7906	CTTGTGTGAG.GCGTATTGAA	G	A	0	0	0	0	0	0	0	0	0	0	0	0	1	1
1	7918	GTATTGAACG.CTTTAACCTC	C	T	0	0	0	0	0	0	0	0	0	0	0	0	1	0
1	7937	CAGTGCTCGG.CTTGGGCAGT	C	T	0	0	0	0	0	0	0	0	0	0	0	0	1	0
1	7939	GTGCTCGGCT.TGGGCAGTGT	T	G	0	0	0	0	0	0	0	0	0	0	0	0	1	0
1	7948	TTGGGCAGTG.TTGTGGCGGA	T	C	0	0	0	0	0	0	0	0	0	0	0	1	0	0
1	7978	TATTGTTTGA.AAAAATATTA	A	G	0	0	0	0	0	0	0	0	0	0	0	1	0	1
1	7986	GAAAAAATAT.TACCCGCTGA	T	C	0	0	0	0	0	0	0	0	0	0	0	1	1	1
1	7990	AAATATTACC.CGCTGAAATT	C	T	0	0	0	0	0	0	0	0	0	0	0	1	0	1
1	7991	AATATTACCC.GCTGAAATTG	G	A	0	0	0	0	0	0	0	0	0	0	0	0	1	0
1	8001	GCTGAAATTG.CGTCGGATTT	C	T	0	0	0	0	0	0	0	0	0	0	0	0	1	0
1	8011	CGTCGGATTT.ATCTGGGAGT	A	G	0	0	0	0	0	0	0	0	0	0	0	0	1	0
1	8014	CGGATTTATC.TGGGAGTTTG	T	C	0	0	0	0	0	0	0	0	0	0	0	1	0	1
1	8017	ATTTATCTGG.GAGTTTGCAA	G	A	0	0	0	0	0	0	0	0	0	0	0	0	1	0
1	8041	GGCGAGCTGG.AAAGCATATA	A	C	0	0	0	0	0	0	0	0	0	0	0	0	1	0
1	8059	TATGGCGTAA.TGCCTCATAT	T	C	0	0	0	0	0	0	0	0	0	0	0	1	1	1
1	8061	TGGCGTAATG.CCTCATATCA	C	T	0	1	1	0	0	0	0	0	0	0	0	1	1	1
1	8062	GGCGTAATGC.CTCATATCAA	C	T	0	0	0	0	0	0	0	0	0	0	0	0	1	0
1	8066	TAATGCCTCA.TATCAATATG	T	C	0	0	0	0	0	0	0	0	0	0	0	0	1	0
1	8089	CCACTTGGCA.AACGATGGAT	A	G	0	0	0	0	0	0	0	0	0	0	0	1	0	1
1	8092	CTTGGCAAAC.GATGGATATG	G	T	0	0	0	0	0	0	0	0	0	0	0	1	0	1
1	8156	ATGGCAATTT.AGCCAGCAGA	A	G	0	0	0	0	0	0	0	0	0	0	0	1	1	1
1	8158	GGCAATTTAG.CCAGCAGATT	C	T	0	0	0	0	0	0	0	0	0	0	0	1	0	1
1	8214	GGGCATGTGG.CTGAAGCAAT	C	G	0	0	0	0	0	0	0	0	0	0	0	1	1	1
1	8239	GTTGTTTATT.ACCTATTGGT	A	G	0	0	0	0	0	0	0	0	0	0	0	1	0	1
1	8287	ATGATATTTT.CCCATCCGAT	C	T	0	0	0	0	0	0	0	0	0	0	0	1	0	0
1	8291	TATTTTCCCA.TCCGATTTAC	T	C	0	0	0	0	0	0	0	0	0	0	0	1	0	0
1	8293	TTTTCCCATC.CGATTTACTG	C	A	0	0	0	0	0	0	0	0	0	0	0	1	0	0
1	8310	CTGGAACAGG.CGTACTGTAT	C	T	0	0	0	0	0	0	0	0	0	0	0	1	1	1
1	8312	GGAACAGGCG.TACTGTATAA	T	C	0	0	0	0	0	0	0	0	0	0	0	1	1	1
1	8314	AACAGGCGTA.CTGTATAACA	C	A	0	0	0	0	0	0	0	0	0	0	0	1	1	1
1	8318	GGCGTACTGT.ATAACAACTG	A	T	0	0	0	0	0	0	0	0	0	0	0	1	1	1
1	8323	ACTGTATAAC.AACTGATACC	A	G,T	0	0	0	0	0	0	0	0	0	0	0	1	2	1
1	8338	ATACCTTAGA.CGCCGAGATC	C	A	0	0	0	0	0	0	0	0	0	0	0	1	1	1
1	8341	CCTTAGACGC.CGAGATCGAA	C	T	0	1	1	0	0	0	0	0	0	0	0	1	1	1
1	8347	ACGCCGAGAT.CGAACATTTT	C	T	0	0	0	0	0	0	0	0	0	0	0	1	1	1
1	8350	CCGAGATCGA.ACATTTTGAC	A	G	0	0	0	0	0	0	0	0	0	0	1	1	1	1
1	8372	TTCAGGTGCA.GTTTTAATTT	G	A	0	0	0	0	0	0	0	0	0	0	0	1	1	1
1	8386	TAATTTTAAC.GCACGATCAT	G	T	0	0	0	0	0	0	0	0	0	0	0	1	1	1
1	8389	TTTTAACGCA.CGATCATCAA	C	T	0	0	0	0	0	0	0	0	0	0	0	1	1	1
1	8399	CGATCATCAA.CTAGATCTGC	C	T	0	0	0	0	0	0	0	0	0	0	0	1	1	1
1	8405	TCAACTAGAT.CTGCAACTGT	C	T	0	0	0	0	0	0	0	0	0	0	0	1	1	1
1	8411	AGATCTGCAA.CTGTGTTTTA	C	T	0	0	0	0	0	0	0	0	0	0	0	1	0	1
1	8422	TGTGTTTTAC.AGCCTTAAAA	A	G	0	0	0	0	0	0	0	0	0	0	0	1	0	1
1	8436	TTAAAACCTA.CGGCAAAACC	C	T	0	0	0	0	0	0	0	0	0	0	0	1	1	1
1	8476	TTGGCTCAAA.GAGTAAAAGG	G	A	0	1	1	0	0	0	0	0	0	0	1	1	1	1
1	8485	AGAGTAAAAG.GGCCATTTTT	G	A	0	1	1	0	0	0	0	0	0	0	0	0	0	0
1	8488	GTAAAAGGGC.CATTTTTGAA	C	T	0	0	0	0	0	0	0	0	0	0	0	0	1	0
1	8525	AGGTTATACT.TCGGAAACAT	T	C	0	0	0	0	0	0	0	0	0	0	0	1	0	1
1	8526	GGTTATACTT.CGGAAACATT	C	A	0	0	0	0	0	0	0	0	0	0	0	1	0	1
1	8533	CTTCGGAAAC.ATTACAACGT	A	T	0	0	0	0	0	0	0	0	0	0	0	0	1	0
1	8536	CGGAAACATT.ACAACGTTTG	A	G	0	0	0	0	0	0	0	0	0	0	0	0	1	0
1	8540	AACATTACAA.CGTTTGGTTT	C	T	0	0	0	0	0	0	0	0	0	0	0	1	0	1
1	8551	GTTTGGTTTG.CCCGATCGGG	C	T	0	1	1	0	0	0	0	0	0	0	0	0	0	0
1	8554	TGGTTTGCCC.GATCGGGATA	G	A	0	0	0	0	0	0	0	0	0	0	0	1	0	1
1	8566	TCGGGATAGA.AGGGATTTCA	A	C	0	1	1	0	0	0	0	0	0	0	0	0	0	0
1	8578	GGATTTCATC.GAAACAACCT	G	A	0	1	1	0	0	0	0	0	0	0	0	0	0	0
1	8673	TTTTTTGTTC.GAATTTTGGA	G	A	0	1	1	0	0	0	0	0	0	0	0	1	0	1
1	8715	GTACGAGAAC.GGCACCTGTG	G	A	0	1	1	0	0	0	0	0	0	0	0	1	0	1
1	8718	CGAGAACGGC.ACCTGTGCCA	A	G	0	1	1	0	0	0	0	0	0	0	0	0	0	0
1	8721	GAACGGCACC.TGTGCCACCT	T	G	0	1	1	0	0	0	0	0	0	0	0	0	0	0
1	8739	CTTGGTTTTC.AGGAGCACTT	A	C	0	0	0	0	0	0	0	0	0	0	0	1	0	1
1	8742	GGTTTTCAGG.AGCACTTACA	A	G	0	1	1	0	0	0	0	0	0	0	0	1	1	1
1	8841	CAATTTTAAT.GACATTTTGA	G	A	0	0	0	0	0	0	0	0	0	0	0	0	1	0
1	8889	GTAAAACTGC.GTCACGTGCT	G	A	0	0	0	0	0	0	0	0	0	0	0	1	0	1
1	8964	CTTTTAAGTC.TTCAAAAACC	T	C	0	0	0	0	0	0	0	0	0	0	0	0	1	0
1	9015	ACGTTGCTTG.GCTTGCGACC	G	A	0	1	1	0	0	0	0	0	0	0	0	0	0	0
1	9099	CTGCACGTTT.CGCCAGAGTT	C	A	0	0	0	0	0	0	0	0	0	0	0	0	0	1
1	9136	GGCACGTGGG.GTTTTTACAT	G	A	0	0	0	0	0	0	0	0	0	0	0	0	1	0
1	9336	TAGAAAGCGA.TGAATCTTTA	T	C	0	0	0	0	0	0	0	0	0	0	0	0	0	1
1	9476	TGCATCATAC.GTACATCATC	G	A	0	0	0	0	0	0	0	0	0	0	0	0	0	1
1	9477	GCATCATACG.TACATCATCT	T	C	0	0	0	0	0	0	0	0	0	0	0	0	0	1
1	9498	GTGTCGCAAT.ACCACTTTCA	A	G	0	0	0	0	0	0	0	0	0	0	0	0	0	1
1	9515	TCAGTGATCA.ATAAACGTGA	A	G	0	0	0	0	0	0	0	0	0	0	0	0	0	1
1	9521	ATCAATAAAC.GTGAGGCCGG	G	C	0	0	0	0	0	0	0	0	0	0	0	1	0	0
1	9527	AAACGTGAGG.CCGGAAGTAA	C	A	0	0	0	0	0	0	0	0	0	0	0	0	0	1
1	9546	ATTTTTTCAA.CCGAATAGTA	C	G	0	0	0	0	0	0	0	0	0	0	0	0	0	1
1	9549	TTTTCAACCG.AATAGTAGTA	A	G	0	0	0	0	0	0	0	0	0	0	0	0	0	1
1	9554	AACCGAATAG.TAGTATTTAA	T	A	0	0	0	0	0	0	0	0	0	0	0	0	0	1
1	9555	ACCGAATAGT.AGTATTTAAA	A	C	0	0	0	0	0	0	0	0	0	0	0	0	0	1
1	9576	CTACATCAAA.GGTTTTTAAA	G	C	0	0	0	0	0	0	0	0	0	0	0	0	0	1
1	9597	TACGGTTATT.CACGCCTAAT	C	T	0	1	1	0	0	0	0	0	0	0	0	0	0	0
1	9600	GGTTATTCAC.GCCTAATAAA	G	A	0	0	0	0	0	0	0	0	0	0	0	0	0	1
1	9605	TTCACGCCTA.ATAAACATTG	A	G	0	0	0	0	0	0	0	0	0	0	0	0	0	1
1	9608	ACGCCTAATA.AACATTGCTC	A	G	0	0	0	0	0	0	0	0	0	0	0	0	1	0
1	9624	GCTCAGAAAG.CTTTAAGGCA	C	T	0	0	0	0	0	0	0	0	0	0	0	0	0	1
1	9639	AGGCACGCTC.CAACTCTTCT	C	T	0	1	1	0	0	0	0	0	0	0	0	1	1	1
1	9684	CAAGTTGATG.CTCAAACGCA	C	T	0	0	0	0	0	0	0	0	0	0	0	0	0	1
1	9693	GCTCAAACGC.AGTTTTAGAC	A	T	0	0	0	0	0	0	0	0	0	0	0	0	0	1
1	9711	ACATTTCTTC.GAGTTGCTGG	G	A	0	0	0	0	0	0	0	0	0	0	0	1	0	0
1	9786	CAACTACATT.GTATGGGTCG	G	A	0	0	0	0	0	0	0	0	0	0	0	0	0	1
1	9789	CTACATTGTA.TGGGTCGACC	T	C	0	1	1	0	0	0	0	0	0	0	0	1	1	0
1	9827	GCAGGTAGGG.CACAATGATT	C	T	0	0	0	0	0	0	0	0	0	0	0	1	0	0
1	9837	CACAATGATT.ACGGGCAATC	A	G	0	0	0	0	0	0	0	0	0	0	0	0	0	1
1	9840	AATGATTACG.GGCAATCGCA	G	A	0	0	0	0	0	0	0	0	0	0	0	0	1	0
1	9879	GAAAGAAATC.AACATCGGTC	A	C	0	0	0	0	0	0	0	0	0	0	0	0	0	1
1	9885	AATCAACATC.GGTCAATACC	G	A	0	0	0	0	0	0	0	0	0	0	0	0	0	1
1	9890	ACATCGGTCA.ATACCGATAA	A	G	0	0	0	0	0	0	0	0	0	0	0	0	0	1
1	9929	TCATATTGCT.CTGCAATTTC	C	G	0	1	1	0	0	0	0	0	0	0	1	1	1	1
1	9930	CATATTGCTC.TGCAATTTCG	T	A	0	1	1	0	0	0	0	0	0	0	1	1	1	1
1	9939	CTGCAATTTC.GGCAGGATTA	G	A	0	0	0	0	0	0	0	0	0	0	0	0	0	1
1	9957	TAAAGTCTGC.GCGAATGATT	G	A	0	0	0	0	0	0	0	0	0	0	0	0	1	0
1	9966	CGCGAATGAT.TCCTTTTGAT	T	C	0	0	0	0	0	0	0	0	0	0	0	0	0	1
1	10005	CAGCAATCAC.GCCCGGACGT	G	A	0	0	0	0	0	0	0	0	0	0	0	0	0	1
1	10029	GTTGTAAAGC.ATTTGCAAAG	A	T	0	0	0	0	0	0	0	0	0	0	0	0	1	0
1	10052	CGCACCGGAG.TCGCTGCTTT	T	A	0	0	0	0	0	0	0	0	0	0	0	0	0	1
1	10269	TAATATCTTG.AGCGAATGCA	A	C	0	0	0	0	0	0	0	0	0	0	0	0	0	1
1	10275	CTTGAGCGAA.TGCAACAGCC	T	A	0	0	0	0	0	0	0	0	0	0	0	0	0	1
1	10277	TGAGCGAATG.CAACAGCCTG	C	T	0	0	0	0	0	0	0	0	0	0	0	0	0	1
1	10284	ATGCAACAGC.CTGAGCATAA	C	T	0	0	0	0	0	0	0	0	0	0	0	0	0	1
1	10296	GAGCATAAGT.CTTGGTAATG	C	T	0	0	0	0	0	0	0	0	0	0	0	0	0	1
1	10308	TGGTAATGCC.CGCTACATAA	C	T	0	1	1	0	0	0	0	0	0	0	0	0	0	0
1	10320	CTACATAAAT.GCCTGCGCCT	G	A	0	0	0	0	0	0	0	0	0	0	1	1	1	1
1	10329	TGCCTGCGCC.TGCATTAAGC	T	C	0	0	0	0	0	0	0	0	0	0	0	0	0	1
1	10353	TCATGTTTGC.AGCTTTTTCA	A	T	0	0	0	0	0	0	0	0	0	0	0	0	0	1
1	10368	TTTCACCAAT.GTCAGATTTA	G	A	0	1	1	0	0	0	0	0	0	0	0	0	1	1
1	10371	CACCAATGTC.AGATTTATTT	A	G	0	0	0	0	0	0	0	0	0	0	0	0	0	1
1	10409	ATGAGCTTTA.GACTCGCCGT	G	A	0	0	1	0	0	0	0	0	0	0	0	0	0	0
1	10410	TGAGCTTTAG.ACTCGCCGTT	A	G	0	0	1	0	0	0	0	0	0	0	0	0	0	0
1	10413	GCTTTAGACT.CGCCGTTGCA	C	T	0	0	1	0	0	0	0	0	0	0	0	0	0	0
1	10418	AGACTCGCCG.TTGCATCTGC	T	A	0	0	1	0	0	0	0	0	0	0	0	0	0	1
1	10425	CCGTTGCATC.TGCGACAACC	T	A	0	0	1	0	0	0	0	0	0	0	0	0	0	0
1	10428	TTGCATCTGC.GACAACCAAA	G	A	0	0	1	0	0	0	0	0	0	0	0	0	0	0
1	10431	CATCTGCGAC.AACCAAACCA	A	C	0	0	1	0	0	0	0	0	0	0	0	0	0	0
1	10434	CTGCGACAAC.CAAACCATTT	C	T	0	0	1	0	0	0	0	0	0	0	0	0	0	0
1	10446	AACCATTTAA.TGTTTGTGAC	T	A	0	0	1	0	0	0	0	0	0	0	0	0	0	0
1	10461	GTGACTCAAT.CCCGACATCT	C	T	0	0	1	0	0	0	0	0	0	0	0	0	1	0
1	10473	CGACATCTTC.AGGATTAAGG	A	C	0	0	1	0	0	0	0	0	0	0	1	1	0	0
1	10482	CAGGATTAAG.GGTCCATTCC	G	T	0	0	1	0	0	0	0	0	0	0	0	0	0	0
1	10491	GGGTCCATTC.CGTAATTTCA	C	A,T	0	0	0	0	0	0	0	0	0	0	0	0	2	1
1	10542	CTGCAAGACT.GATTTCATCA	G	A	0	0	0	0	0	0	0	0	0	0	0	1	1	0
1	10617	CTTCGGCAAT.CGGGCGGCAC	C	T	0	0	0	0	0	0	0	0	0	0	0	1	1	0
1	10623	CAATCGGGCG.GCACAGTTCA	G	A	0	1	1	0	0	0	0	0	0	0	0	0	0	1
1	10626	TCGGGCGGCA.CAGTTCATCT	C	A	0	1	1	0	0	0	0	0	0	0	0	0	0	1
1	10638	GTTCATCTGA.AAACACACCA	A	G	0	1	0	0	0	0	0	0	0	0	0	0	0	0
1	10650	ACACACCAAT.GACAAAGCGC	G	C	0	0	0	0	0	0	0	0	0	0	0	1	1	1
1	10659	TGACAAAGCG.CTTTACACCA	C	T	0	0	0	0	0	0	0	0	0	0	0	1	1	1
1	10665	AGCGCTTTAC.ACCAGCAGGG	A	C	0	1	1	0	0	0	0	0	0	0	0	0	0	0
1	10671	TTACACCAGC.AGGGTTGGTC	A	C,T	0	1	1	0	0	0	0	0	0	0	0	2	2	1
1	10674	CACCAGCAGG.GTTGGTCAGT	G	A	0	0	0	0	0	0	0	0	0	0	0	1	1	0
1	10686	TGGTCAGTGG.GCCAAGTAAA	G	A	0	1	1	0	0	0	0	0	0	0	0	0	0	1
1	10689	TCAGTGGGCC.AAGTAAATTA	A	G	0	1	1	0	0	0	0	0	0	0	0	0	1	1
1	10707	TAAAAATACT.ACGAATACCA	A	T	0	0	0	0	0	0	0	0	0	0	0	0	1	1
1	10731	CACGACGTGG.GCCAGCCGCA	G	A	0	0	0	0	0	0	0	0	0	0	0	0	0	1
1	10737	GTGGGCCAGC.CGCATATTTC	C	A	0	1	1	0	0	0	0	0	0	0	0	1	0	1
1	10740	GGCCAGCCGC.ATATTTCATG	A	G	0	0	0	0	0	0	0	0	0	0	0	1	0	1
1	10755	TCATGGCTTT.GTGGTGGTTT	G	A	0	0	0	0	0	0	0	0	0	0	0	0	0	1
1	10758	TGGCTTTGTG.GTGGTTTGGT	G	A	0	0	0	0	0	0	0	0	0	0	0	0	0	1
1	10767	GGTGGTTTGG.TGCAAACAAG	T	A	0	0	0	0	0	0	0	0	0	0	0	0	0	1
1	10782	ACAAGAAACC.TACACCCATT	T	C	0	1	1	0	0	0	0	0	0	0	0	0	0	1
1	10794	CACCCATTTC.ACGGATGCAG	A	G	0	0	0	0	0	0	0	0	0	0	0	0	1	1
1	10800	TTTCACGGAT.GCAGCGTTCG	G	A	0	0	0	0	0	0	0	0	0	0	0	0	1	0
1	10842	GATGAATACC.TGCTTGCTCA	T	C	0	0	0	0	0	0	0	0	0	0	0	1	0	0
1	10848	TACCTGCTTG.CTCAAGTAGG	C	T	0	1	1	0	0	0	0	0	0	0	0	1	1	0
1	10890	AAACGCCACG.GTTACCATGT	G	A	0	1	1	0	0	0	0	0	0	0	0	1	1	0
1	10893	CGCCACGGTT.ACCATGTTTT	A	G	0	0	0	0	0	0	0	0	0	0	0	1	0	0
1	10923	CACCTGCTGC.AGCAATCACA	A	T	0	0	0	0	0	0	0	0	0	0	0	1	0	0
1	10941	CAAAGCTAGA.TGCTGTAGAG	T	C	0	1	1	0	0	0	0	0	0	0	0	1	0	0
1	10947	TAGATGCTGT.AGAGACATTA	A	G	0	0	0	0	0	0	0	0	0	0	0	0	0	1
1	10950	ATGCTGTAGA.GACATTAAAT	G	A	0	1	1	0	0	0	0	0	0	0	0	0	0	0
1	10953	CTGTAGAGAC.ATTAAATAAA	A	G	0	1	1	0	0	0	0	0	0	0	0	1	0	1
1	10974	TTTGTCCATC.ACCGCCAGTA	A	T	0	0	0	0	0	0	0	0	0	0	0	1	0	0
1	10977	GTCCATCACC.GCCAGTACCC	G	A	0	0	0	0	0	0	0	0	0	0	0	0	1	0
1	10983	CACCGCCAGT.ACCCACAATA	A	T	0	1	1	0	0	0	0	0	0	0	0	1	0	1
1	10989	CAGTACCCAC.AATATCAACT	A	G	0	1	1	0	0	0	0	0	0	0	0	1	0	0
1	10995	CCACAATATC.AACTAAATGT	A	T,C	0	2	2	0	0	0	0	0	0	0	0	1	0	1
1	11013	GTTTGATATC.ACTCACATCG	A	G	0	1	1	0	0	0	0	0	0	0	0	1	1	1
1	11016	TGATATCACT.CACATCGATC	C	A	0	0	0	0	0	0	0	0	0	0	0	0	0	1
1	11025	TCACATCGAT.CTTGATCGCA	C	T	0	1	1	0	0	0	0	0	0	0	0	0	1	0
1	11040	TCGCAAATTC.ACGCATGACA	A	T	0	1	1	0	0	0	0	0	0	0	0	0	1	0
1	11096	TTCATGCGTA.GGCCCATCAT	G	A	0	1	1	0	0	0	0	0	0	0	0	0	1	0
1	11283	TGATCGAGTG.TGGGAGGTTC	T	C	0	1	1	0	0	0	0	0	0	0	0	0	0	0
1	11360	AAGATTTTTG.CTGTTCGATA	C	T	0	0	0	0	0	0	0	0	0	0	0	0	0	1
1	11389	AAAATTTTGC.TCAGTTAGGG	T	G	0	0	0	0	0	0	0	0	0	0	0	0	1	0
1	11403	TTAGGGTATG.GGTTTGAGTC	G	A	0	0	1	0	0	0	0	0	0	0	0	0	0	0
1	11405	AGGGTATGGG.TTTGAGTCAT	T	G	0	1	1	0	0	0	0	0	0	0	0	1	0	0
1	11419	AGTCATAAAC.AGAATTTATT	A	G	0	0	0	0	0	0	0	0	0	0	0	0	0	1
1	11425	AAACAGAATT.TATTTATTGA	T	C	0	0	0	0	0	0	0	0	0	0	0	0	0	1
1	11598	ATTTAAATAA.ATTGAAATAT	A	C	0	1	1	0	0	0	0	0	0	0	0	1	1	1
1	11599	TTTAAATAAA.TTGAAATATG	T	A	0	1	1	0	0	0	0	0	0	0	0	0	0	0
1	11668	GTTTCATCCA.TTAGAAAGCT	T	C	0	1	1	0	0	0	0	0	0	0	0	0	0	0
1	11670	TTCATCCATT.AGAAAGCTAT	A	T	0	1	1	0	0	0	0	0	0	0	0	0	0	0
1	11671	TCATCCATTA.GAAAGCTATG	G	A	0	0	0	0	0	0	0	0	0	0	0	0	0	1
1	11676	CATTAGAAAG.CTATGCGCAA	C	T	0	0	0	0	0	0	0	0	0	0	0	0	1	0
1	11689	TGCGCAAGAA.ACCGTAGAGC	A	G	0	0	0	0	0	0	0	0	0	0	0	0	1	0
1	11692	GCAAGAAACC.GTAGAGCAAA	G	T	0	0	0	0	0	0	0	0	0	0	0	0	1	0
1	11701	CGTAGAGCAA.ACACAAAACC	A	C	0	0	0	0	0	0	0	0	0	0	0	0	1	0
1	11709	AAACACAAAA.CCAAGCTAAA	C	T	0	0	0	0	0	0	0	0	0	0	1	0	0	0
1	11715	AAAACCAAGC.TAAACCAGAT	T	G	0	0	0	0	0	0	0	0	0	0	0	0	1	0
1	11730	CAGATAAAGT.AGTTCGTGTT	A	G	0	0	0	0	0	0	0	0	0	0	0	0	1	0
1	11733	ATAAAGTAGT.TCGTGTTGCG	T	C,A	0	0	0	0	0	0	0	0	0	0	0	0	2	1
1	11736	AAGTAGTTCG.TGTTGCGGTG	T	C	0	0	0	0	0	0	0	0	0	0	0	0	1	0
1	11742	TTCGTGTTGC.GGTGACAGGT	G	A,T	0	0	0	0	0	0	0	0	0	0	0	0	2	1
1	11745	GTGTTGCGGT.GACAGGTTCT	G	A	0	0	0	0	0	0	0	0	0	0	0	0	0	1
1	11751	CGGTGACAGG.TTCTCGGATT	T	A	0	0	0	0	0	0	0	0	0	0	0	0	1	1
1	11757	CAGGTTCTCG.GATTTCAAAA	G	A	0	0	0	0	0	0	0	0	0	0	0	0	0	1
1	11787	ATGGCCCGAC.CAGTGTGACC	C	T	0	0	0	0	0	0	0	0	0	0	0	0	1	0
1	11811	TTACCGCAGC.TGATATTGAA	T	C	0	0	0	0	0	0	0	0	0	0	0	0	1	1
1	11829	AAAAACAAGG.GTTTAGTAAT	G	T	0	1	1	0	0	0	0	0	0	0	1	1	1	1
1	11838	GGTTTAGTAA.TGCATTTGAT	T	C	0	0	0	0	0	0	0	0	0	0	0	0	0	1
1	11847	ATGCATTTGA.TGCACTTAAT	T	C	0	1	1	0	0	0	0	0	0	0	1	1	1	0
1	11853	TTGATGCACT.TAATAACTTG	T	C	0	1	1	0	0	0	0	0	0	0	1	1	1	1
1	11860	ACTTAATAAC.TTGACGCAGA	T	C	0	1	1	0	0	0	0	0	0	0	1	1	1	1
1	11868	ACTTGACGCA.GAACACGGGT	G	A	0	1	1	0	0	0	0	0	0	0	1	1	1	1
1	11874	CGCAGAACAC.GGGTTTTGTA	G	T	0	1	1	0	0	0	0	0	0	0	1	1	0	1
1	11883	CGGGTTTTGT.ACAAGGCGCC	A	G	0	1	1	0	0	0	0	0	0	0	1	1	0	1
1	11889	TTGTACAAGG.CGCCGATTAT	C	T	0	1	1	0	0	0	0	0	0	0	1	1	1	1
1	11919	TTACACCTGC.GGCTAATGCC	G	A	0	1	1	0	0	0	0	0	0	0	1	1	0	1
1	11922	CACCTGCGGC.TAATGCCATT	T	G	0	1	1	0	0	0	0	0	0	0	1	1	0	0
1	11925	CTGCGGCTAA.TGCCATTAGC	T	C	0	1	1	0	0	0	0	0	0	0	1	1	0	0
1	11934	ATGCCATTAG.CTTGCGAGGC	C	T	0	1	1	0	0	0	0	0	0	0	1	1	0	1
1	11937	CCATTAGCTT.GCGAGGCTTG	G	A	0	0	0	0	0	0	0	0	0	0	0	0	1	0
1	11943	GCTTGCGAGG.CTTGGGACCG	C	T	0	1	1	0	0	0	0	0	0	0	1	1	0	1
1	11944	CTTGCGAGGC.TTGGGACCGA	T	C	0	1	1	0	0	0	0	0	0	0	0	1	0	0
1	11946	TGCGAGGCTT.GGGACCGAAT	G	A	0	0	0	0	0	0	0	0	0	0	1	1	1	1
1	11949	GAGGCTTGGG.ACCGAATCAT	A	T	0	0	0	0	0	0	0	0	0	0	1	0	0	1
1	11952	GCTTGGGACC.GAATCATACT	G	A,T,C	0	3	3	0	0	0	0	0	0	0	1	3	2	1
1	11964	ATCATACTTT.AACTTTAATT	A	G	0	1	1	0	0	0	0	0	0	0	1	1	0	1
1	11991	ATCGGGTTGC.AGACTATCCT	A	G	0	1	1	0	0	0	0	0	0	0	0	0	0	0
1	12006	ATCCTGTACC.TTATGATGGC	T	G	0	1	1	0	0	0	0	0	0	0	1	1	0	0
1	12009	CTGTACCTTA.TGATGGCTCT	T	C	0	1	1	0	0	0	0	0	0	0	1	1	0	0
1	12012	TACCTTATGA.TGGCTCTGTC	T	C	0	1	1	0	0	0	0	0	0	0	1	1	0	0
1	12015	CTTATGATGG.CTCTGTCAAT	C	T	0	1	1	0	0	0	0	0	0	0	1	1	0	0
1	12027	CTGTCAATTT.CGTAAATTTA	C	T	0	0	0	0	0	0	0	0	0	0	1	0	0	0
1	12030	TCAATTTCGT.AAATTTAGCC	A	G	0	0	0	0	0	0	0	0	0	0	0	1	0	1
1	12033	ATTTCGTAAA.TTTAGCCAAT	T	C	0	0	0	0	0	0	0	0	0	0	0	1	0	1
1	12048	CCAATATTCC.AACTGCTATT	A	C	0	0	0	0	0	0	0	0	0	0	0	1	0	1
1	12054	TTCCAACTGC.TATTATTGAC	T	C	0	1	1	0	0	0	0	0	0	0	0	1	1	1
1	12063	CTATTATTGA.CCGTATTGAA	C	T	0	0	0	0	0	0	0	0	0	0	0	0	1	0
1	12087	TAAACGGTGG.CGCTTCTGCA	C	T	0	0	0	0	0	0	0	0	0	0	0	0	1	0
1	12090	ACGGTGGCGC.TTCTGCAATT	T	C	0	0	0	0	0	0	0	0	0	0	0	0	1	0
1	12123	CAATTGCAGG.CGTGGTGAAT	C	T	0	1	1	0	0	0	0	0	0	0	0	1	1	0
1	12129	CAGGCGTGGT.GAATATTATT	G	A	0	1	1	0	0	0	0	0	0	0	1	0	0	0
1	12132	GCGTGGTGAA.TATTATTCTG	T	C	0	0	0	0	0	0	0	0	0	0	0	0	1	0
1	12141	ATATTATTCT.GAAAAAGAAA	G	A	0	0	0	0	0	0	0	0	0	0	1	1	0	0
1	12156	AGAAAACAGA.CGGCACACAA	C	T	0	0	0	0	0	0	0	0	0	0	1	1	0	0
1	12159	AAACAGACGG.CACACAATTT	C	T	0	0	0	0	0	0	0	0	0	0	0	0	1	1
1	12162	CAGACGGCAC.ACAATTTAAT	A	T	0	0	0	0	0	0	0	0	0	0	0	0	1	1
1	12172	ACAATTTAAT.ATCAAGGCAG	A	T	0	0	0	0	0	0	0	0	0	0	0	1	0	0
1	12174	AATTTAATAT.CAAGGCAGGC	C	T	0	1	1	0	0	0	0	0	0	0	1	1	1	1
1	12183	TCAAGGCAGG.CGGAACTAAA	C	T	0	1	1	0	0	0	0	0	0	0	1	1	1	1
1	12189	CAGGCGGAAC.TAAAGAAGGT	T	C	0	1	1	0	0	0	0	0	0	0	1	0	1	1
1	12193	CGGAACTAAA.GAAGGTGGCG	G	A	0	1	1	0	0	0	0	0	0	0	0	0	0	0
1	12198	CTAAAGAAGG.TGGCGAAAAT	T	C	0	0	0	0	0	0	0	0	0	0	0	0	1	1
1	12201	AAGAAGGTGG.CGAAAATTTA	C	T	0	1	1	0	0	0	0	0	0	0	1	1	1	1
1	12207	GTGGCGAAAA.TTTACGTTTA	T	C	0	1	1	0	0	0	0	0	0	0	0	1	0	0
1	12220	ACGTTTACAA.CTGAGTGGTA	C	T	0	1	1	0	0	0	0	0	0	0	0	0	0	0
1	12222	GTTTACAACT.GAGTGGTAGT	G	A	0	0	0	0	0	0	0	0	0	0	1	0	0	0
1	12228	AACTGAGTGG.TAGTAAAACT	T	C	0	1	1	0	0	0	0	0	0	0	0	1	0	0
1	12249	TAGACAAGCT.TAGTCTCGTC	T	C	0	0	0	0	0	0	0	0	0	0	0	0	1	1
1	12252	ACAAGCTTAG.TCTCGTCTAT	T	C	0	0	0	0	0	0	0	0	0	0	0	0	1	1
1	12255	AGCTTAGTCT.CGTCTATGGG	C	T	0	1	1	0	0	0	0	0	0	0	0	0	1	1
1	12258	TTAGTCTCGT.CTATGGGATT	C	T	0	1	1	0	0	0	0	0	0	0	1	1	1	1
1	12265	CGTCTATGGG.ATTGAACTCA	A	G	0	1	1	0	0	0	0	0	0	0	1	0	1	0
1	12306	CAGCCGATCG.AGATTTTATG	A	G	0	1	1	0	0	0	0	0	0	0	1	1	0	0
1	12333	GAACTCGTTT.AGGAGAAAAA	A	G	0	1	1	0	0	0	0	0	0	0	1	1	1	1
1	12360	CGATTGTGGG.TCGTAAAAAT	T	C	0	1	1	0	0	0	0	0	0	0	1	1	1	1
1	12372	GTAAAAATGC.TGATACTGGT	T	C	0	0	0	0	0	0	0	0	0	0	0	1	0	1
1	12387	CTGGTAAATA.TCTTTCAATT	T	C	0	1	1	0	0	0	0	0	0	0	1	1	1	1
1	12393	AATATCTTTC.AATTGGTGGA	A	T	0	1	1	0	0	0	0	0	0	0	1	1	1	1
1	12402	CAATTGGTGG.ATGTCAGGCC	A	G	0	0	0	0	0	0	0	0	0	0	0	1	0	1
1	12504	CTTATTGGAC.GGTTCAGACC	G	T	0	1	1	0	0	0	0	0	0	0	0	0	0	0
1	12510	GGACGGTTCA.GACCCAAAAC	G	A	0	0	0	0	0	0	0	0	0	0	1	0	0	0
1	12570	ATGATAAAAC.TCAATTATTT	T	C	0	1	1	0	0	0	0	0	0	0	1	0	0	0
1	12574	TAAAACTCAA.TTATTTGCAG	T	C	0	1	1	0	0	0	0	0	0	0	0	0	0	0
1	12582	AATTATTTGC.AGATTTTTTG	A	C	0	1	1	0	0	0	0	0	0	0	1	0	0	1
1	12591	CAGATTTTTT.GATTGGGGCA	G	A	0	1	1	0	0	0	0	0	0	0	1	0	0	1
1	12597	TTTTGATTGG.GGCAAACCAA	G	T	0	0	0	0	0	0	0	0	0	0	1	0	0	0
1	12598	TTTGATTGGG.GCAAACCAAA	G	T	0	0	0	0	0	0	0	0	0	0	0	0	1	0
1	12599	TTGATTGGGG.CAAACCAAAT	C	T	0	0	0	0	0	0	0	0	0	0	0	0	0	1
1	12600	TGATTGGGGC.AAACCAAATT	A	T	0	0	0	0	0	0	0	0	0	0	1	0	0	0
1	12603	TTGGGGCAAA.CCAAATTGAA	C	T	0	1	1	0	0	0	0	0	0	0	0	0	0	1
1	12615	AAATTGAAAA.TAATACCCGT	T	C	0	0	0	0	0	0	0	0	0	0	1	0	0	1
1	12632	CGTAGTCCGA.TATGGACTTC	T	C	0	0	0	0	0	0	0	0	0	0	0	1	0	0
1	12639	CGATATGGAC.TTCTTTAGCT	T	C	0	0	0	0	0	0	0	0	0	0	0	0	0	1
1	12647	ACTTCTTTAG.CTGCAACGAG	C	G	0	0	0	0	0	0	0	0	0	0	0	0	0	1
1	12648	CTTCTTTAGC.TGCAACGAGT	T	C	0	0	0	0	0	0	0	0	0	0	0	0	0	1
1	12652	TTTAGCTGCA.ACGAGTGGTT	A	T	0	0	0	0	0	0	0	0	0	0	0	0	0	1
1	12654	TAGCTGCAAC.GAGTGGTTAT	G	A	0	0	0	0	0	0	0	0	0	0	0	0	0	1
1	12678	TAAATCAAGA.TTCGGGAAAT	T	C	0	0	0	0	0	0	0	0	0	0	0	0	0	1
1	12705	TTTGGAATCG.CCGTTTTGCA	C	T	0	0	0	0	0	0	0	0	0	0	1	0	0	1
1	12714	GCCGTTTTGC.ACCTGAAGAA	A	G	0	0	0	0	0	0	0	0	0	0	0	0	0	1
1	12723	CACCTGAAGA.ATTAGGTGGG	A	G	0	0	0	0	0	0	0	0	0	0	0	0	0	1
1	12729	AAGAATTAGG.TGGGGTAGAA	T	C	0	0	0	0	0	0	0	0	0	0	0	0	0	1
1	12741	GGGTAGAACG.AATAAATAAA	A	C	0	0	0	0	0	0	0	0	0	0	0	0	0	1
1	12753	TAAATAAAAA.ATGGAAAGAA	A	G	0	0	0	0	0	0	0	0	0	0	0	0	0	1
1	12763	ATGGAAAGAA.ATTTCTTCTA	A	C	0	1	1	0	0	0	0	0	0	0	0	1	1	1
1	12771	AAATTTCTTC.TAACTTAAAT	T	G	0	0	0	0	0	0	0	0	0	0	0	0	0	1
1	12780	CTAACTTAAA.TTTTGGAATT	T	C	0	0	0	0	0	0	0	0	0	0	0	0	0	1
1	12783	ACTTAAATTT.TGGAATTCGA	T	C	0	0	0	0	0	0	0	0	0	0	0	0	0	1
1	12795	GAATTCGAGG.CGATATTGGA	C	G	0	0	0	0	0	0	0	0	0	0	0	0	0	1
1	12807	ATATTGGAGA.GACGAGCTGG	G	A	0	0	0	0	0	0	0	0	0	0	0	0	0	1
1	12830	TATGAAGCAG.TCTATAATGG	T	C	0	1	1	0	0	0	0	0	0	0	1	1	1	1
1	12852	CCATTTATAC.TAGTCAGCTA	T	C	0	0	0	0	0	0	0	0	0	0	0	0	0	1
1	12862	TAGTCAGCTA.AACCGCCAAG	A	C	0	0	0	0	0	0	0	0	0	0	0	0	1	1
1	12863	AGTCAGCTAA.ACCGCCAAGG	A	G	0	0	0	0	0	0	0	0	0	0	0	0	1	1
1	12873	ACCGCCAAGG.CTTATTACGT	C	T	0	0	0	0	0	0	0	0	0	0	0	0	0	1
1	12891	GTTCGAATGT.TGATGAATAT	T	G	0	0	0	0	0	0	0	0	0	0	0	0	1	0
1	12897	ATGTTGATGA.ATATTTCTTA	A	G	0	0	0	0	0	0	0	0	0	0	0	0	0	1
1	12900	TTGATGAATA.TTTCTTAGGT	T	C	0	0	0	0	0	0	0	0	0	0	0	0	0	1
1	12951	CTATTTATTC.ACCTCACTTA	A	C	0	0	0	0	0	0	0	0	0	0	0	0	1	0
1	12957	ATTCACCTCA.CTTAGATCGT	C	T	0	1	1	0	0	0	0	0	0	0	0	0	1	0
1	12979	AAGTCGACCA.CTAACAGCAA	C	T	0	0	0	0	0	0	0	0	0	0	0	1	1	0
1	13061	ACCTTAAGTG.CGAATGGTGA	C	T	0	0	0	0	0	0	0	0	0	0	1	0	0	0
1	13071	CGAATGGTGA.TGTATTTAAG	T	C	0	0	0	0	0	0	0	0	0	0	0	1	0	0
1	13074	ATGGTGATGT.ATTTAAGTTA	A	G	0	1	1	0	0	0	0	0	0	0	1	0	1	1
1	13081	TGTATTTAAG.TTACCTGCAG	T	C	0	0	0	0	0	0	0	0	0	0	0	1	0	0
1	13089	AGTTACCTGC.AGGAACGGCC	A	G	0	0	0	0	0	0	0	0	0	0	1	0	1	1
1	13094	CCTGCAGGAA.CGGCCAAACT	C	T	0	1	1	0	0	0	0	0	0	0	0	0	0	0
1	13095	CTGCAGGAAC.GGCCAAACTT	G	T	0	0	0	0	0	0	0	0	0	0	1	1	1	1
1	13107	CCAAACTTGC.GACTGTGGCC	G	A	0	1	1	0	0	0	0	0	0	0	1	0	1	1
1	13108	CAAACTTGCG.ACTGTGGCCG	A	G	0	1	1	0	0	0	0	0	0	0	1	1	1	1
1	13110	AACTTGCGAC.TGTGGCCGAA	T	A	0	1	1	0	0	0	0	0	0	0	1	0	1	1
1	13116	CGACTGTGGC.CGAAATTGGG	C	T	0	1	1	0	0	0	0	0	0	0	1	1	1	1
1	13134	GGCGTCAAGG.TTTTTCGATT	T	C	0	1	1	0	0	0	0	0	0	0	1	1	1	1
1	13137	GTCAAGGTTT.TTCGATTAAG	T	C	0	0	0	0	0	0	0	0	0	0	0	1	0	0
1	13153	TAAGCCAGAT.GAGGCGATCG	G	C	0	1	1	0	0	0	0	0	0	0	1	1	1	1
1	13158	CAGATGAGGC.GATCGAAAAT	G	A	0	1	1	0	0	0	0	0	0	0	1	1	1	1
1	13159	AGATGAGGCG.ATCGAAAATG	A	G,C	0	1	1	0	0	0	0	0	0	0	1	2	1	1
1	13161	ATGAGGCGAT.CGAAAATGGT	C	T	0	1	1	0	0	0	0	0	0	0	1	1	1	1
1	13230	GCCAAGCACT.TGGTGCAGAA	T	G	0	0	0	0	0	0	0	0	0	0	0	0	1	0
1	13233	AAGCACTTGG.TGCAGAATTA	T	C	0	1	1	0	0	0	0	0	0	0	0	0	0	0
1	13236	CACTTGGTGC.AGAATTATTC	A	C	0	0	0	0	0	0	0	0	0	0	0	1	0	0
1	13260	CTTTAGCAAA.GCCATTAAAT	G	A	0	0	0	0	0	0	0	0	0	0	0	0	1	1
1	13263	TAGCAAAGCC.ATTAAATTTA	A	G,C	0	0	0	0	0	0	0	0	0	0	0	0	2	1
1	13276	AAATTTAACC.TTGTCCGGAC	T	C	0	0	0	0	0	0	0	0	0	0	0	0	0	1
1	13281	TAACCTTGTC.CGGACGTTAT	C	T	0	1	1	0	0	0	0	0	0	0	0	0	0	0
1	13287	TGTCCGGACG.TTATGACCGT	T	C	0	0	0	0	0	0	0	0	0	0	0	0	0	1
1	13317	CAGATAACAG.TATTGATAAG	T	C	0	0	0	0	0	0	0	0	0	0	0	0	0	1
1	13335	AGCTAACTTT.CGGTTCAGGC	C	T	0	0	0	0	0	0	0	0	0	0	0	1	1	0
1	13341	CTTTCGGTTC.AGGCCTTGAG	A	G	0	0	0	0	0	0	0	0	0	0	0	0	0	1
1	13344	TCGGTTCAGG.CCTTGAGTTT	C	T	0	0	0	0	0	0	0	0	0	0	0	0	0	1
1	13347	GTTCAGGCCT.TGAGTTTAGG	T	C	0	0	0	0	0	0	0	0	0	0	0	0	0	1
1	13356	TTGAGTTTAG.GCCACATCCG	G	A	0	0	0	0	0	0	0	0	0	0	0	1	0	1
1	13368	CACATCCGAC.TTTATTGGTG	T	A	0	0	0	0	0	0	0	0	0	0	0	0	0	1
1	13377	CTTTATTGGT.GCGCGGTAAC	G	A	0	1	1	0	0	0	0	0	0	0	0	0	0	0
1	13380	TATTGGTGCG.CGGTAACTAC	C	T	0	1	1	0	0	0	0	0	0	0	0	0	0	1
1	13386	TGCGCGGTAA.CTACGCAACT	C	T	0	0	0	0	0	0	0	0	0	0	0	0	0	1
1	13389	GCGGTAACTA.CGCAACTAGT	C	T	0	0	0	0	0	0	0	0	0	0	1	0	0	0
1	13392	GTAACTACGC.AACTAGTTTT	A	G	0	0	0	0	0	0	0	0	0	0	0	1	0	1
1	13395	ACTACGCAAC.TAGTTTTCGT	T	C	0	0	0	0	0	0	0	0	0	0	0	0	0	1
1	13398	ACGCAACTAG.TTTTCGTGCA	T	C	0	0	0	0	0	0	0	0	0	0	0	0	0	1
1	13407	GTTTTCGTGC.ACCAGATATG	A	G	0	1	1	0	0	0	0	0	0	0	0	0	0	0
1	13425	TGAACTATCT.GTTCTTAAAT	G	C	0	0	0	0	0	0	0	0	0	0	0	0	1	0
1	13428	ACTATCTGTT.CTTAAATAAG	C	T	0	0	0	0	0	0	0	0	0	0	1	0	0	1
1	13437	TCTTAAATAA.GCAAAAAGGT	G	A	0	1	1	0	0	0	0	0	0	0	1	0	1	1
1	13454	GGTTATTTCG.CAAGTACGAC	C	A	0	0	0	0	0	0	0	0	0	0	1	0	0	0
1	13457	TATTTCGCAA.GTACGACTGA	G	A	0	0	0	0	0	0	0	0	0	0	1	0	0	0
1	13458	ATTTCGCAAG.TACGACTGAC	T	G	0	0	0	0	0	0	0	0	0	0	1	0	0	0
1	13460	TTCGCAAGTA.CGACTGACTA	C	T	0	0	0	0	0	0	0	0	0	0	1	0	0	0
1	13461	TCGCAAGTAC.GACTGACTAT	G	C,A	0	2	2	0	0	0	0	0	0	0	1	0	0	0
1	13464	CAAGTACGAC.TGACTATTTA	T	C,A	0	2	2	0	0	0	0	0	0	0	1	0	0	0
1	13467	GTACGACTGA.CTATTTACGT	C	T	0	1	1	0	0	0	0	0	0	0	1	0	0	0
1	13481	TTACGTTGTA.GCCAAACGGG	G	A	0	1	1	0	0	0	0	0	0	0	0	0	0	0
1	13495	AACGGGACAA.CCTTTAGATA	C	T	0	0	0	0	0	0	0	0	0	0	1	0	0	0
1	13511	GATAAATGTA.GCTTTAAAGA	G	C	0	1	1	0	0	0	0	0	0	0	1	0	1	1
1	13512	ATAAATGTAG.CTTTAAAGAT	C	T	0	0	0	0	0	0	0	0	0	0	0	0	0	1
1	13525	TAAAGATTAC.GCACCTGGGG	G	T	0	1	1	0	0	0	0	0	0	0	0	0	0	0
1	13527	AAGATTACGC.ACCTGGGGCG	A	G	0	1	1	0	0	0	0	0	0	0	0	0	0	0
1	13566	ACAAAGAGCT.GAAACCTGAA	G	T	0	0	0	0	0	0	0	0	0	0	1	0	0	0
1	13591	TAAATCTTAT.GGTGCAGGGT	G	A	0	0	1	0	0	0	0	0	0	0	0	0	0	0
1	13593	AATCTTATGG.TGCAGGGTTT	T	G	0	0	0	0	0	0	0	0	0	0	1	0	0	0
1	13595	TCTTATGGTG.CAGGGTTTGT	C	T	0	0	0	0	0	0	0	0	0	0	0	0	0	1
1	13599	ATGGTGCAGG.GTTTGTTTGG	G	T,A	0	1	1	0	0	0	0	0	0	0	1	0	0	2
1	13611	TTGTTTGGTC.GCCAACCAAT	G	A	0	1	1	0	0	0	0	0	0	0	0	0	0	0
1	13623	CAACCAATAA.ATTTGATATC	A	G	0	0	0	0	0	0	0	0	0	0	1	0	0	0
1	13629	ATAAATTTGA.TATCAGCGTC	T	C	0	0	0	0	0	0	0	0	0	0	1	0	0	0
1	13632	AATTTGATAT.CAGCGTCGAT	C	T	0	0	0	0	0	0	0	0	0	0	1	0	0	0
1	13636	TGATATCAGC.GTCGATTACT	G	A	0	0	0	0	0	0	0	0	0	0	0	0	0	1
1	13641	TCAGCGTCGA.TTACTGGGAT	T	C	0	0	0	0	0	0	0	0	0	0	0	1	1	0
1	13656	GGGATATCAA.AATTGATAAT	A	G	0	0	0	0	0	0	0	0	0	0	0	1	0	0
1	13673	AATCTTGTGA.CCAACTTAAG	C	G	0	0	0	0	0	0	0	0	0	0	1	0	0	0
1	13674	ATCTTGTGAC.CAACTTAAGT	C	A	0	0	0	0	0	0	0	0	0	0	1	0	0	0
1	13677	TTGTGACCAA.CTTAAGTGCG	C	T	0	1	1	0	0	0	0	0	0	0	1	0	0	0
1	13680	TGACCAACTT.AAGTGCGGAC	A	G	0	0	0	0	0	0	0	0	0	0	1	0	0	0
1	13685	AACTTAAGTG.CGGACAAAAT	C	A	0	0	0	0	0	0	0	0	0	0	1	0	0	0
1	13686	ACTTAAGTGC.GGACAAAATT	G	T	0	0	0	0	0	0	0	0	0	0	1	0	0	0
1	13704	TTCTACGTTT.GGAAGCAGAT	G	A	0	0	0	0	0	0	0	0	0	0	1	1	0	0
1	13708	ACGTTTGGAA.GCAGATTGTC	G	A	0	0	0	0	0	0	0	0	0	0	0	1	0	0
1	13746	TTAACTCTGC.AGCCTGTATT	A	G	0	1	1	0	0	0	0	0	0	0	1	1	0	0
1	13761	GTATTGATGC.ATTAGCACGT	A	T	0	1	1	0	0	0	0	0	0	0	1	0	0	0
1	13764	TTGATGCATT.AGCACGTGTG	A	G	0	1	1	0	0	0	0	0	0	0	1	1	0	0
1	13773	TAGCACGTGT.GGAGCGTAAC	G	A	0	1	1	0	0	0	0	0	0	0	1	1	0	0
1	13782	TGGAGCGTAA.CCCTGCAAAT	C	T	0	0	0	0	0	0	0	0	0	0	0	1	0	0
1	13803	CAGTTGTCGA.CCCAAATGTG	C	T	0	1	1	0	0	0	0	0	0	0	1	1	0	1
1	13812	ACCCAAATGT.GATTAAGAAT	G	A	0	1	1	0	0	0	0	0	0	0	1	0	0	1
1	13824	TTAAGAATAT.AAATATCGTT	A	T	0	1	1	0	0	0	0	0	0	0	1	1	0	0
1	13830	ATATAAATAT.CGTTCCGATT	C	T	0	0	0	0	0	0	0	0	0	0	0	1	0	0
1	13845	CGATTAATGC.TGCATCCGAC	T	A	0	1	1	0	0	0	0	0	0	0	1	0	0	0
1	13851	ATGCTGCATC.CGACCATACC	C	A	0	1	1	0	0	0	0	0	0	0	1	1	0	1
1	13863	ACCATACCCG.CGGGATTGAT	C	T	0	0	0	0	0	0	0	0	0	0	0	1	1	0
1	13878	TTGATTTCAC.TAGCAGATGG	T	G	0	0	0	0	0	0	0	0	0	0	0	1	0	0
1	13880	GATTTCACTA.GCAGATGGCG	G	C	0	1	1	0	0	0	0	0	0	0	0	0	0	0
1	13881	ATTTCACTAG.CAGATGGCGC	C	T	0	1	1	0	0	0	0	0	0	0	0	0	0	0
1	13927	TCTCTGGACG.ATCAATTATA	A	G	0	1	1	0	0	0	0	0	0	0	1	0	0	1
1	13929	TCTGGACGAT.CAATTATAGC	C	A	0	1	1	0	0	0	0	0	0	0	1	0	0	1
1	13938	TCAATTATAG.CCGTGTACTA	C	T	0	0	0	0	0	0	0	0	0	0	1	0	0	1
1	13941	ATTATAGCCG.TGTACTAGAA	T	A	0	0	0	0	0	0	0	0	0	0	0	1	0	0
1	13975	ATCAAAAGAT.CACGAGAAAG	C	G	0	1	1	0	0	0	0	0	0	0	0	1	1	1
1	13976	TCAAAAGATC.ACGAGAAAGA	A	G	0	1	1	0	0	0	0	0	0	0	0	1	1	1
1	13977	CAAAAGATCA.CGAGAAAGAT	C	T	0	0	0	0	0	0	0	0	0	0	0	1	0	0
1	13980	AAGATCACGA.GAAAGATGAC	G	A	0	1	1	0	0	0	0	0	0	0	0	0	0	0
1	13989	AGAAAGATGA.CTATTTAAAA	C	T	0	1	1	0	0	0	0	0	0	0	0	0	0	0
1	13992	AAGATGACTA.TTTAAAAGAT	T	C	0	1	1	0	0	0	0	0	0	0	0	0	1	1
1	14006	AAAGATTTAA.GTAGTCTGGA	G	C	0	0	0	0	0	0	0	0	0	0	0	1	1	0
1	14007	AAGATTTAAG.TAGTCTGGAT	T	C	0	1	1	0	0	0	0	0	0	0	0	1	1	0
1	14009	GATTTAAGTA.GTCTGGATTG	G	T	0	1	1	0	0	0	0	0	0	0	0	1	1	1
1	14012	TTAAGTAGTC.TGGATTGGCG	T	C	0	1	1	0	0	0	0	0	0	0	0	1	1	1
1	14013	TAAGTAGTCT.GGATTGGCGT	G	T	0	1	1	0	0	0	0	0	0	0	0	0	1	0
1	14106	AAATTCCAAA.TGGTAACCAA	T	C	0	1	1	0	0	0	0	0	0	0	1	1	1	0
1	14109	TTCCAAATGG.TAACCAAACT	T	C,A	0	2	2	0	0	0	0	0	0	0	1	1	1	0
1	14110	TCCAAATGGT.AACCAAACTG	A	G	0	1	1	0	0	0	0	0	0	0	1	1	1	0
1	14112	CAAATGGTAA.CCAAACTGCC	C	T	0	0	0	0	0	0	0	0	0	0	0	0	0	1
1	14115	ATGGTAACCA.AACTGCCTAT	A	G	0	1	1	0	0	0	0	0	0	0	0	0	0	0
1	14121	ACCAAACTGC.CTATTTAAGC	C	T	0	0	0	0	0	0	0	0	0	0	1	1	1	0
1	14124	AAACTGCCTA.TTTAAGCCCA	T	C	0	0	0	0	0	0	0	0	0	0	1	1	1	0
1	14125	AACTGCCTAT.TTAAGCCCAA	T	C	0	0	0	0	0	0	0	0	0	0	1	1	1	0
1	14130	CCTATTTAAG.CCCAACGTAT	C	T	0	0	0	0	0	0	0	0	0	0	1	1	1	0
1	14154	TGAACTGGAG.CGGTACTTAT	C	T	0	1	1	0	0	0	0	0	0	0	1	1	1	0
1	14181	CTCCAAAAGC.TTCTGCTTCA	T	A	0	1	1	0	0	0	0	0	0	0	0	0	0	0
1	14199	CAATCATTAT.TAATAACTTG	T	C	0	0	0	0	0	0	0	0	0	0	0	0	0	1
1	14206	TATTAATAAC.TTGTTTGACA	T	C	0	0	0	0	0	0	0	0	0	0	1	1	1	0
1	14208	TTAATAACTT.GTTTGACAAA	G	A	0	1	1	0	0	0	0	0	0	0	0	0	0	0
1	14235	GAGATGACAC.AGGCGGTTGG	A	G	0	1	1	0	0	0	0	0	0	0	1	1	1	0
1	14247	GCGGTTGGCC.GTATTATCCG	G	A	0	1	1	0	0	0	0	0	0	0	0	0	0	0
1	14256	CGTATTATCC.GATAGGATCA	G	A	0	1	1	0	0	0	0	0	0	0	1	1	1	0
1	14257	GTATTATCCG.ATAGGATCAT	A	G	0	1	1	0	0	0	0	0	0	0	1	1	1	0
1	14326	AGAATGATGT.ATGGATGCAG	A	G	0	0	0	0	0	0	0	0	0	0	1	1	1	1
1	14327	GAATGATGTA.TGGATGCAGT	T	G	0	0	0	0	0	0	0	0	0	0	1	1	1	1
1	14336	ATGGATGCAG.TGAAGTGGTA	T	C	0	1	1	0	0	0	0	0	0	0	1	1	1	1
1	14351	TGGTACAGCA.TTTGCTGCAT	T	A	0	0	0	0	0	0	0	0	0	0	0	1	0	1
1	14428	AAAAAAGATT.GTTACTTACA	G	A	0	0	0	0	0	0	0	0	0	0	0	1	1	1
1	14429	AAAAAGATTG.TTACTTACAA	T	C	0	1	1	0	0	0	0	0	0	0	1	1	1	1
1	14458	CTTTATCGGC.AACACAGATT	A	T,G	0	2	2	0	0	0	0	0	0	0	0	0	0	1
1	14476	TTTTTGCATC.GAATAACAGT	G	T	0	1	1	0	0	0	0	0	0	0	0	1	1	1
1	14512	GTAAATTACC.CGAGTGGGTC	C	T	0	0	0	0	0	0	0	0	0	0	0	1	1	1
1	14521	CCGAGTGGGT.CGTACCCGAA	C	T	0	0	0	0	0	0	0	0	0	0	0	0	1	0
1	14522	CGAGTGGGTC.GTACCCGAAT	G	A	0	0	0	0	0	0	0	0	0	0	0	0	1	0
1	14587	CCGGTAAAAC.TACGATTCAT	T	C	0	0	0	0	0	0	0	0	0	0	0	0	1	0
1	14589	GGTAAAACTA.CGATTCATTT	C	A	0	0	0	0	0	0	0	0	0	0	0	1	0	0
1	14590	GTAAAACTAC.GATTCATTTA	G	T	0	0	0	0	0	0	0	0	0	0	1	0	1	0
1	14602	TTCATTTAAA.GCTGGCTCAA	G	A	0	0	0	0	0	0	0	0	0	0	0	0	1	0
1	14606	TTTAAAGCTG.GCTCAAGCCA	G	A	0	0	0	0	0	0	0	0	0	0	0	0	0	1
1	14641	TTCATGGTAA.ATCTTTAACG	A	G	0	0	0	0	0	0	0	0	0	0	1	0	0	0
1	14647	GTAAATCTTT.AACGGTTAAA	A	G	0	1	1	0	0	0	0	0	0	0	0	1	1	1
1	14653	CTTTAACGGT.TAAAGATGTG	T	G	0	1	1	0	0	0	0	0	0	0	0	1	1	1
1	14668	ATGTGAATAT.TACATCGGCA	T	C	0	1	1	0	0	0	0	0	0	0	0	1	0	1
1	14670	GTGAATATTA.CATCGGCAGA	C	T	0	1	1	0	0	0	0	0	0	0	0	0	0	0
1	14677	TTACATCGGC.AGAGGGCGTC	A	T	0	1	1	0	0	0	0	0	0	0	0	0	0	0
1	14678	TACATCGGCA.GAGGGCGTCA	G	C	0	0	0	0	0	0	0	0	0	0	1	0	1	0
1	14683	CGGCAGAGGG.CGTCAAAACC	C	T	0	1	1	0	0	0	0	0	0	0	1	1	1	1
1	14684	GGCAGAGGGC.GTCAAAACCA	G	A	0	0	0	0	0	0	0	0	0	0	1	1	1	1
1	14685	GCAGAGGGCG.TCAAAACCAA	T	C	0	1	1	0	0	0	0	0	0	0	1	1	1	1
1	14686	CAGAGGGCGT.CAAAACCAAG	C	T	0	1	1	0	0	0	0	0	0	0	1	1	1	1
1	14695	TCAAAACCAA.GGCAAAATAT	G	A	0	1	1	0	0	0	0	0	0	0	0	0	0	0
1	14716	AGCAAGCCTC.TGAAATAGAT	T	C	0	0	0	0	0	0	0	0	0	0	0	1	0	0
1	14719	AAGCCTCTGA.AATAGATGGG	A	G	0	1	1	0	0	0	0	0	0	0	0	1	0	0
1	14720	AGCCTCTGAA.ATAGATGGGG	A	G	0	1	1	0	0	0	0	0	0	0	0	1	0	1
1	14731	TAGATGGGGT.GAGTAAAATT	G	A	0	1	1	0	0	0	0	0	0	0	0	0	0	0
1	14742	AGTAAAATTA.AATTTGCCAA	A	G	0	0	0	0	0	0	0	0	0	0	0	0	0	1
1	14746	AAATTAAATT.TGCCAAAACC	T	C	0	0	0	0	0	0	0	0	0	0	0	0	0	1
1	14752	AATTTGCCAA.AACCTTGCCC	A	G	0	1	1	0	0	0	0	0	0	0	0	0	0	0
1	14761	AAACCTTGCC.CGCAGGACAG	C	A	0	1	1	0	0	0	0	0	0	0	0	0	0	0
1	14767	TGCCCGCAGG.ACAGTATCAA	A	C	0	1	1	0	0	0	0	0	0	0	0	0	1	1
1	14781	TATCAACTCG.TTCTAGATTT	T	C	0	0	0	0	0	0	0	0	0	0	0	1	0	0
1	14797	ATTTTAATGC.AGCGTATGAC	A	G	0	1	1	0	0	0	0	0	0	0	0	0	1	1
1	14803	ATGCAGCGTA.TGACCAGCAG	T	C	0	0	0	0	0	0	0	0	0	0	0	0	1	1
1	14812	ATGACCAGCA.GCTCGATGGT	G	A	0	1	1	0	0	0	0	0	0	0	0	1	0	0
1	14815	ACCAGCAGCT.CGATGGTATT	C	T	0	1	1	0	0	0	0	0	0	0	0	1	0	0
1	14818	AGCAGCTCGA.TGGTATTTAT	T	C	0	1	1	0	0	0	0	0	0	0	0	1	0	0
1	14833	TTTATAAAAT.CGAGTTTGAG	C	T	0	0	0	0	0	0	0	0	0	0	1	0	1	0
1	14845	AGTTTGAGGG.TAAACCTTAT	T	A	0	0	0	0	0	0	0	0	0	0	1	0	0	1
1	14863	ATGTGATGAC.GCAAATGGAA	G	T	0	1	1	0	0	0	0	0	0	0	0	0	1	0
1	14896	GCCAGTCATT.CCCATCATTT	C	T	0	1	1	0	0	0	0	0	0	0	0	0	0	0
1	14899	AGTCATTCCC.ATCATTTGAT	A	G	0	1	1	0	0	0	0	0	0	0	0	0	0	0
1	14911	CATTTGATGA.ACCACGTTTT	A	G	0	1	1	0	0	0	0	0	0	0	0	0	0	0
1	14935	CGCCGTTTAA.TATTCGTTTG	T	C	0	0	0	0	0	0	0	0	0	0	0	0	0	1
1	14968	AATATTCAGG.TTTTGCCAAT	T	G,A	0	1	1	0	0	0	0	0	0	0	0	2	0	1
1	14980	TTGCCAATAC.CCAACAAACA	C	T	0	0	0	0	0	0	0	0	0	0	0	0	1	0
1	14989	CCCAACAAAC.ATCTGAGCAA	A	T	0	1	1	0	0	0	0	0	0	0	0	0	0	0
1	14999	ATCTGAGCAA.ATAGAGAAGT	A	G	0	1	1	0	0	0	0	0	0	0	0	1	0	1
1	15000	TCTGAGCAAA.TAGAGAAGTC	T	C	0	1	1	0	0	0	0	0	0	0	0	1	0	1
1	15010	TAGAGAAGTC.AGGGTGGAAA	A	G	0	1	1	0	0	0	0	0	0	0	0	1	0	1
1	15013	AGAAGTCAGG.GTGGAAAACA	G	T	0	1	1	0	0	0	0	0	0	0	0	1	0	1
1	15532	TTAATGCTGA.CCTAGAACGT	C	T	0	0	0	0	0	0	0	0	0	0	0	0	0	1
1	15545	AGAACGTATT.ACAGACACCG	A	G,T	0	1	1	0	0	0	0	0	0	0	0	0	2	1
1	15550	GTATTACAGA.CACCGCAGAT	C	T	0	1	1	0	0	0	0	0	0	0	0	0	0	0
1	15556	CAGACACCGC.AGATGCGATG	A	C	0	1	1	0	0	0	0	0	0	0	0	0	0	0
1	15574	TGAAAAGTGA.CAGCTTAGTG	C	T	0	1	1	0	0	0	0	0	0	0	0	1	0	0
1	15580	GTGACAGCTT.AGTGAGTGTG	A	G	0	1	1	0	0	0	0	0	0	0	0	0	0	0
1	15583	ACAGCTTAGT.GAGTGTGCGC	G	A	0	0	0	0	0	0	0	0	0	0	0	0	0	1
1	15601	GCCGTATTCG.TCAACCTATT	T	C	0	1	1	0	0	0	0	0	0	0	0	0	1	1
1	15604	GTATTCGTCA.ACCTATTTTA	A	G	0	0	0	0	0	0	0	0	0	0	0	0	1	1
1	15616	CTATTTTAAG.CAATGCCGAT	C	T	0	0	0	0	0	0	0	0	0	0	0	0	1	0
1	15622	TAAGCAATGC.CGATATTCAA	C	T	0	0	0	0	0	0	0	0	0	0	0	1	1	0
1	15634	ATATTCAAAC.GGCTTTTGAT	G	T,C	0	2	2	0	0	0	0	0	0	0	0	0	1	0
1	15646	CTTTTGATGG.CATCACGTAT	C	T	0	1	1	0	0	0	0	0	0	0	0	0	1	0
1	15649	TTGATGGCAT.CACGTATCAA	C	T	0	1	1	0	0	0	0	0	0	0	0	0	1	0
1	15652	ATGGCATCAC.GTATCAAAAA	G	T	0	1	1	0	0	0	0	0	0	0	1	0	1	1
1	15655	GCATCACGTA.TCAAAAAGGT	T	C	0	1	1	0	0	0	0	0	0	0	0	0	1	0
1	15667	AAAAAGGTGC.GGCTGTTTTA	G	A,T	0	2	2	0	0	0	0	0	0	0	1	0	1	1
1	15690	ATGTTTGAAA.GCTATTTAGG	G	A	0	0	0	0	0	0	0	0	0	0	0	0	1	0
1	15694	TTGAAAGCTA.TTTAGGCGAA	T	C	0	1	1	0	0	0	0	0	0	0	0	0	0	0
1	15700	GCTATTTAGG.CGAAGAAAAA	C	T	0	0	0	0	0	0	0	0	0	0	0	0	1	0
1	15721	TCAAACAAGG.AGTGCGTAAT	A	G	0	1	1	0	0	0	0	0	0	0	0	0	1	0
1	15724	AACAAGGAGT.GCGTAATTAT	G	A	0	1	1	0	0	0	0	0	0	0	0	0	0	0
1	15727	AAGGAGTGCG.TAATTATATT	T	C	0	1	1	0	0	0	0	0	0	0	0	0	1	0
1	15766	ATGCGACAGC.TAATGATTTA	T	C	0	1	1	0	0	0	0	0	0	0	0	1	0	0
1	15781	ATTTAATTAG.CGCTTTAGCA	C	T	0	0	0	0	0	0	0	0	0	0	0	0	1	0
1	15801	GAGCAGTCTG.GACAAGGTGA	G	A	0	0	0	0	0	0	0	0	0	0	0	1	0	0
1	15802	AGCAGTCTGG.ACAAGGTGAG	A	G	0	0	0	0	0	0	0	0	0	0	0	1	0	0
1	15806	GTCTGGACAA.GGTGAGCGCT	G	A	0	0	0	0	0	0	0	0	0	0	0	1	0	0
1	15814	AAGGTGAGCG.CTTTACTAGA	C	T	0	1	1	0	0	0	0	0	0	0	0	0	0	0
1	15818	TGAGCGCTTT.ACTAGAGCGA	A	G	0	1	1	0	0	0	0	0	0	0	0	1	0	0
1	15820	AGCGCTTTAC.TAGAGCGATG	T	C	0	1	1	0	0	0	0	0	0	0	0	0	0	0
1	15822	CGCTTTACTA.GAGCGATGAA	G	A	0	0	0	0	0	0	0	0	0	0	0	1	0	0
1	15825	TTTACTAGAG.CGATGAAAAG	C	G	0	1	1	0	0	0	0	0	0	0	0	0	0	0
1	15827	TACTAGAGCG.ATGAAAAGTT	A	G	0	0	0	0	0	0	0	0	0	0	0	1	0	0
1	15838	TGAAAAGTTT.TCTTGATCAA	T	C	0	0	0	0	0	0	0	0	0	0	1	1	1	1
1	15850	TTGATCAACC.AGGTGTGCCT	A	G	0	0	0	0	0	0	0	0	0	0	1	1	1	1
1	15856	AACCAGGTGT.GCCTTTAATT	G	A	0	1	1	0	0	0	0	0	0	0	1	1	1	1
1	15863	TGTGCCTTTA.ATTAACACCG	A	C	0	0	0	0	0	0	0	0	0	0	1	1	1	1
1	15865	TGCCTTTAAT.TAACACCGCA	T	C	0	1	1	0	0	0	0	0	0	0	1	1	1	1
1	15868	CTTTAATTAA.CACCGCATTA	C	T	0	1	1	0	0	0	0	0	0	0	1	1	1	1
1	15871	TAATTAACAC.CGCATTACAG	C	T	0	1	1	0	0	0	0	0	0	0	1	1	1	1
1	15872	AATTAACACC.GCATTACAGC	G	T	0	1	1	0	0	0	0	0	0	0	1	1	1	1
1	15875	TAACACCGCA.TTACAGCAAG	T	C	0	0	0	0	0	0	0	0	0	0	1	1	1	1
1	15937	TACCTGTGGG.CTCAAAAGGT	C	T	0	1	1	0	0	0	0	0	0	0	0	0	0	0
1	15958	ATGCAAGAAG.CCTCTGGGGT	C	T	0	1	1	0	0	0	0	0	0	0	0	0	0	0
1	15961	CAAGAAGCCT.CTGGGGTGTA	C	G	0	1	1	0	0	0	0	0	0	0	0	0	0	0
1	15973	GGGGTGTACC.GTTATGTGTA	G	A	0	1	1	0	0	0	0	0	0	0	1	0	1	1
1	15979	TACCGTTATG.TGTACGTTAT	T	C	0	1	1	0	0	0	0	0	0	0	0	0	0	0
1	16005	CCAAATGCAG.GTAGTAAAGT	G	C	0	1	1	0	0	0	0	0	0	0	0	0	0	0
1	16006	CAAATGCAGG.TAGTAAAGTG	T	C	0	1	1	0	0	0	0	0	0	0	0	0	0	0
1	16012	CAGGTAGTAA.AGTGCAATGT	A	G	0	1	1	0	0	0	0	0	0	0	0	0	0	0
1	16015	GTAGTAAAGT.GCAATGTGAA	G	C	0	1	1	0	0	0	0	0	0	0	0	0	0	0
1	16018	GTAAAGTGCA.ATGTGAATTG	A	G	0	1	1	0	0	0	0	0	0	0	0	0	0	0
1	16024	TGCAATGTGA.ATTGGTAGAC	A	G	0	1	1	0	0	0	0	0	0	0	0	0	0	0
1	16025	GCAATGTGAA.TTGGTAGACC	T	C	0	1	1	0	0	0	0	0	0	0	0	0	0	0
1	16043	CCAAGCAGAA.GCCAAGATTG	G	T	0	1	1	0	0	0	0	0	0	0	0	0	0	0
1	16048	CAGAAGCCAA.GATTGAACTC	G	A	0	0	0	0	0	0	0	0	0	0	1	0	1	1
1	16066	TCAAAGGTGC.CAGCCTTGGC	C	T	0	1	1	0	0	0	0	0	0	0	0	0	0	0
1	16087	GTTGGTATAT.TCCAAATGCA	T	A	0	0	0	0	0	0	0	0	0	0	1	0	1	1
1	16097	TCCAAATGCA.GATGCGGCAG	G	A	0	1	1	0	0	0	0	0	0	0	0	0	0	0
1	16105	CAGATGCGGC.AGGATACTAT	A	G	0	0	0	0	0	0	0	0	0	0	1	0	1	1
1	16108	ATGCGGCAGG.ATACTATCAA	A	G	0	1	1	0	0	0	0	0	0	0	0	0	0	0
1	16111	CGGCAGGATA.CTATCAATTT	C	T	0	1	1	0	0	0	0	0	0	0	0	0	0	0
1	16114	CAGGATACTA.TCAATTTAGT	T	C	0	1	1	0	0	0	0	0	0	0	1	1	1	1
1	16132	GTTTGCCACA.GAAAGAATTT	G	A	0	1	1	0	0	0	0	0	0	0	0	0	0	0
1	16148	ATTTACTCGT.CTGACTGCTG	C	T	0	1	1	0	0	0	0	0	0	0	0	0	0	0
1	16156	GTCTGACTGC.TGCTACAGAA	T	C	0	1	1	0	0	0	0	0	0	0	0	0	0	0
1	16177	AGCTTTCTAA.CACTGAACAG	C	T	0	0	0	0	0	0	0	0	0	0	1	0	0	1
1	16192	AACAGTTGGC.TTATGCCTAT	T	C	0	0	0	0	0	0	0	0	0	0	1	0	0	1
1	16195	AGTTGGCTTA.TGCCTATGCA	T	C	0	0	0	0	0	0	0	0	0	0	0	0	0	1
1	16201	CTTATGCCTA.TGCAATTTCA	T	C	0	0	0	0	0	0	0	0	0	0	0	0	0	1
1	16204	ATGCCTATGC.AATTTCAGCT	A	G	0	0	0	0	0	0	0	0	0	0	0	0	0	1
1	16216	TTTCAGCTGC.ATTTAACCAC	A	T	0	0	0	0	0	0	0	0	0	0	1	0	0	1
1	16240	ATATTAATTT.ATTGGCTGTC	A	G	0	1	1	0	0	0	0	0	0	0	0	1	1	0
1	16279	TTGCCAATTC.GAATAGCCGA	G	A	0	0	0	0	0	0	0	0	0	0	0	1	1	0
1	16280	TGCCAATTCG.AATAGCCGAC	A	G	0	1	1	0	0	0	0	0	0	0	0	0	0	0
1	16304	TAGTACAGCG.CTGTTTTCCC	C	T	0	1	1	0	0	0	0	0	0	0	0	0	0	0
1	16324	AGTTAAGTAC.CATTCATCGT	C	G	0	1	1	0	0	0	0	0	0	0	0	0	0	0
1	16333	CCATTCATCG.TCATGTATTG	T	C	0	0	0	0	0	0	0	0	0	0	0	1	0	0
1	16364	TGAACGTGAA.CGTTTTAGAA	C	T	0	1	1	0	0	0	0	0	0	0	0	0	0	0
1	16365	GAACGTGAAC.GTTTTAGAAA	G	A	0	1	1	0	0	0	0	0	0	0	1	1	1	1
1	16369	GTGAACGTTT.TAGAAAAGTC	T	C	0	0	0	0	0	0	0	0	0	0	1	0	0	1
1	16378	TTAGAAAAGT.CTTAGCTAAT	C	T	0	1	1	0	0	0	0	0	0	0	1	1	1	1
1	16381	GAAAAGTCTT.AGCTAATTTA	A	G	0	1	1	0	0	0	0	0	0	0	1	1	1	1
1	16384	AAGTCTTAGC.TAATTTATAT	T	C,A	0	1	1	0	0	0	0	0	0	0	1	2	2	1
1	16399	TATATTTACC.TAAATTAAAT	T	A	0	1	1	0	0	0	0	0	0	0	0	0	0	0
1	16434	AGCAAAACAG.ACGAATCAGC	A	G	0	1	1	0	0	0	0	0	0	0	1	1	1	1
1	16435	GCAAAACAGA.CGAATCAGCT	C	T	0	1	1	0	0	0	0	0	0	0	1	1	1	1
1	16447	AATCAGCTGA.AGACAGTTTA	A	G	0	1	1	0	0	0	0	0	0	0	0	0	0	0
1	16456	AAGACAGTTT.ATGGCGTAGT	A	G	0	1	1	0	0	0	0	0	0	0	0	0	0	0
1	16468	GGCGTAGTGA.GTTGGTTAGA	G	A	0	1	1	0	0	0	0	0	0	0	0	0	0	0
1	16471	GTAGTGAGTT.GGTTAGATTT	G	A	0	0	0	0	0	0	0	0	0	0	0	1	0	0
1	16487	ATTTCTTGCT.CTAGATATTC	C	T	0	1	1	0	0	0	0	0	0	0	1	1	0	1
1	16502	TATTCAAGTT.CCTGAAGTTC	C	T	0	1	1	0	0	0	0	0	0	0	0	0	0	0
1	16504	TTCAAGTTCC.TGAAGTTCGT	T	A	0	1	1	0	0	0	0	0	0	0	0	0	0	0
1	16516	AAGTTCGTAC.CCAACTGTTA	C	A	0	1	1	0	0	0	0	0	0	0	0	0	0	0
1	16534	TAAAACAGTC.AGATGCTCTA	A	T	0	0	0	0	0	0	0	0	0	0	0	1	0	1
1	16539	CAGTCAGATG.CTCTATTTGC	C	T	0	0	0	0	0	0	0	0	0	0	0	1	1	1
1	16541	GTCAGATGCT.CTATTTGCTC	C	T	0	0	0	0	0	0	0	0	0	0	0	0	0	1
1	16543	CAGATGCTCT.ATTTGCTCAA	A	C	0	1	1	0	0	0	0	0	0	0	0	0	0	0
1	16549	CTCTATTTGC.TCAAAAGCAG	T	C	0	0	0	0	0	0	0	0	0	0	0	0	1	0
1	16570	TTAATTTTGC.GCAAGTAACA	G	T	0	1	1	0	0	0	0	0	0	0	0	0	0	0
1	16594	AATTATTGCC.AACCATTTTA	A	C	0	0	0	0	0	0	0	0	0	0	0	0	0	1
1	16597	TATTGCCAAC.CATTTTAGCT	C	T	0	1	1	0	0	0	0	0	0	0	0	0	0	0
1	16624	TACAAGAAAA.AGGTCAACCA	A	G	0	0	0	0	0	0	0	0	0	0	0	0	0	1
1	16627	AAGAAAAAGG.TCAACCAGCT	T	C	0	1	1	0	0	0	0	0	0	0	0	0	0	1
1	16631	AAAAGGTCAA.CCAGCTTTTG	C	T	0	0	0	0	0	0	0	0	0	0	0	0	0	1
1	16633	AAGGTCAACC.AGCTTTTGAC	A	T	0	1	1	0	0	0	0	0	0	0	0	0	0	1
1	16642	CAGCTTTTGA.CCGATTGTCT	C	T	0	1	1	0	0	0	0	0	0	0	0	0	0	1
1	16645	CTTTTGACCG.ATTGTCTGGA	A	T	0	1	1	0	0	0	0	0	0	0	0	0	0	1
1	16648	TTGACCGATT.GTCTGGAGAG	G	A	0	1	1	0	0	0	0	0	0	0	0	0	0	1
1	16658	GTCTGGAGAG.TTACAACGCG	T	C	0	1	1	0	0	0	0	0	0	0	0	0	0	0
1	16678	TGACTCAACC.GACACAACGT	G	A,T	0	2	2	0	0	0	0	0	0	0	0	1	1	0
1	16684	AACCGACACA.ACGTCTTGCA	A	G	0	0	0	0	0	0	0	0	0	0	0	0	0	1
1	16693	AACGTCTTGC.AATACTTACA	A	G	0	0	0	0	0	0	0	0	0	0	0	1	1	1
1	16696	GTCTTGCAAT.ACTTACAGCC	A	T	0	1	1	0	0	0	0	0	0	0	0	1	1	1
1	16702	CAATACTTAC.AGCCTTGGGT	A	G	0	1	1	0	0	0	0	0	0	0	0	0	0	0
1	16705	TACTTACAGC.CTTGGGTTCA	C	T	0	1	1	0	0	0	0	0	0	0	1	0	0	1
1	16706	ACTTACAGCC.TTGGGTTCAG	T	C	0	1	1	0	0	0	0	0	0	0	0	1	1	0
1	16708	TTACAGCCTT.GGGTTCAGCA	G	A	0	1	1	0	0	0	0	0	0	0	0	1	1	0
1	16720	GTTCAGCAAA.TCAAGAAGCA	T	C	0	0	0	0	0	0	0	0	0	0	1	0	0	1
1	16732	AAGAAGCAAC.GCGCCAACAA	G	A	0	1	1	0	0	0	0	0	0	0	0	1	1	0
1	16735	AAGCAACGCG.CCAACAAGCA	C	T	0	0	0	0	0	0	0	0	0	0	0	0	0	1
1	16744	GCCAACAAGC.ACGTCAGTTG	A	C	0	0	0	0	0	0	0	0	0	0	1	0	0	1
1	16759	AGTTGATTTT.AAACCCGCGT	A	G	0	1	1	0	0	0	0	0	0	0	0	0	0	0
1	16762	TGATTTTAAA.CCCGCGTGTT	C	T	0	0	0	0	0	0	0	0	0	0	0	1	1	0
1	16765	TTTTAAACCC.GCGTGTTAAA	G	T	0	1	1	0	0	0	0	0	0	0	0	0	0	0
1	16768	TAAACCCGCG.TGTTAAAGTT	T	G	0	0	0	0	0	0	0	0	0	0	0	1	1	0
1	16777	GTGTTAAAGT.TGGTGAAGTT	T	C,A	0	1	1	0	0	0	0	0	0	0	1	2	2	0
1	16786	TTGGTGAAGT.TCGTACCGTG	T	C	0	1	1	0	0	0	0	0	0	0	0	0	0	0
1	16798	GTACCGTGGT.CAACTCAATC	C	T	0	0	0	0	0	0	0	0	0	0	0	1	1	0
1	16804	TGGTCAACTC.AATCAATAGT	A	C	0	1	1	0	0	0	0	0	0	0	0	1	1	0
1	16812	TCAATCAATA.GTTATGGAGA	G	A	0	1	1	0	0	0	0	0	0	0	1	1	1	1
1	16831	ATGAACAAGG.TGGCTTATGG	T	G	0	1	1	0	0	0	0	0	0	0	0	0	0	0
1	16834	AACAAGGTGG.CTTATGGTCT	C	G	0	1	1	0	0	0	0	0	0	0	0	0	0	0
1	16835	ACAAGGTGGC.TTATGGTCTT	T	C	0	1	1	0	0	0	0	0	0	0	0	0	0	0
1	16843	GCTTATGGTC.TTGGTTTAAA	T	C,G	0	2	2	0	0	0	0	0	0	0	0	0	0	1
1	16852	CTTGGTTTAA.AGTAAATCAT	A	G	0	0	0	0	0	0	0	0	0	0	1	1	1	1
1	16867	ATCATGACGC.TGTGTTTGAT	T	C	0	1	1	0	0	0	0	0	0	0	0	1	0	0
1	17239	GGCCATGTTG.GCTCAAAATG	G	A	0	1	1	0	0	0	0	0	0	0	0	0	0	0
1	17248	GGCTCAAAAT.GGATTCAGGA	G	A	0	1	1	0	0	0	0	0	0	0	0	1	0	1
1	17254	AAATGGATTC.AGGATGGAAC	A	C,T	0	2	2	0	0	0	0	0	0	0	1	1	1	1
1	17263	CAGGATGGAA.CTGCACGCCT	C	T	0	0	0	0	0	0	0	0	0	0	1	1	1	1
1	17269	GGAACTGCAC.GCCTTCAACA	G	A	0	1	1	0	0	0	0	0	0	0	0	0	0	0
1	17275	GCACGCCTTC.AACAGGAAGT	A	G	0	1	1	0	0	0	0	0	0	0	0	0	0	0
1	17280	CCTTCAACAG.GAAGTGTCTT	G	A	0	0	0	0	0	0	0	0	0	0	0	0	1	0
1	17281	CTTCAACAGG.AAGTGTCTTA	A	G	0	0	0	0	0	0	0	0	0	0	0	0	1	0
1	17287	CAGGAAGTGT.CTTATGTTTA	C	T	0	0	0	0	0	0	0	0	0	0	0	0	1	0
1	17299	TATGTTTAAC.GCCCATAATT	G	A	0	0	0	0	0	0	0	0	0	0	0	1	1	0
1	17305	TAACGCCCAT.AATTTCTTCC	A	G	0	0	0	0	0	0	0	0	0	0	0	0	1	1
1	17344	TGGTCCAGCA.TGTTACTTCA	T	C	0	0	0	0	0	0	0	0	0	0	0	0	1	1
1	17356	TTACTTCAAG.GCAGTCAGGT	G	A	0	1	1	0	0	0	0	0	0	0	0	0	1	1
1	17368	AGTCAGGTAG.TGTTTCTTGA	T	G,C	0	2	2	0	0	0	0	0	0	0	0	0	1	1
1	17374	GTAGTGTTTC.TTGATCAATG	T	C	0	1	1	0	0	0	0	0	0	0	0	0	1	1
1	17383	CTTGATCAAT.GACTAATGAA	G	C	0	1	1	0	0	0	0	0	0	0	0	0	1	1
1	17407	AACGAGTTGC.CGAGAATGGG	C	T	0	1	1	0	0	0	0	0	0	0	1	0	0	0
1	17413	TTGCCGAGAA.TGGGCTAGGA	T	A	0	1	1	0	0	0	0	0	0	0	1	0	0	0
1	17458	TATGGTACAT.ATCAGATAAA	A	G	0	1	1	0	0	0	0	0	0	0	0	0	1	1
1	17473	ATAAACGTCC.ATGCATCACC	A	G	0	1	1	0	0	0	0	0	0	0	1	0	1	1
1	17479	GTCCATGCAT.CACCGTTTTG	C	A	0	0	0	0	0	0	0	0	0	0	0	1	0	0
1	17500	CTCTTACAAT.TTTCCCGCCA	T	A	0	0	0	0	0	0	0	0	0	0	0	1	0	0
1	17503	TTACAATTTT.CCCGCCAAAA	C	T	0	0	1	0	0	0	0	0	0	0	1	1	0	0
1	17506	CAATTTTCCC.GCCAAAAGCT	G	A	0	0	0	0	0	0	0	0	0	0	0	0	1	0
1	17533	TACTTTGATG.GCCTAAACAC	G	C	0	1	0	0	0	0	0	0	0	0	0	1	0	0
1	17538	TGATGGCCTA.AACACACCCC	A	G	0	0	0	0	0	0	0	0	0	0	1	0	0	0
1	17545	CTAAACACAC.CCCAAGCAAA	C	T,G	0	2	2	0	0	0	0	0	0	0	1	2	0	0
1	17551	ACACCCCAAG.CAAAGGAATT	C	T	0	0	0	0	0	0	0	0	0	0	1	0	1	0
1	17562	AAAGGAATTT.TTCCGGCAAA	T	C	0	0	0	0	0	0	0	0	0	0	1	0	0	0
1	17572	TTCCGGCAAA.ATGATTAATT	A	G	0	0	0	0	0	0	0	0	0	0	0	1	0	0
1	17573	TCCGGCAAAA.TGATTAATTG	T	C	0	0	0	0	0	0	0	0	0	0	0	1	0	0
1	17590	TTGCAGGAAT.TGAAATACCT	T	G	0	0	0	0	0	0	0	0	0	0	0	1	0	0
1	17599	TTGAAATACC.TGCCTCGCTT	T	C	0	0	0	0	0	0	0	0	0	0	0	1	0	0
1	17602	AAATACCTGC.CTCGCTTGGA	C	T	0	0	0	0	0	0	0	0	0	0	1	1	0	0
1	17605	TACCTGCCTC.GCTTGGAGAG	G	A	0	0	0	0	0	0	0	0	0	0	1	1	1	0
1	17620	GAGAGCAAGG.GCCAGGACCA	G	A	0	0	0	0	0	0	0	0	0	0	0	1	0	0
1	17632	CAGGACCAAT.CACAAGATAT	C	A	0	0	0	0	0	0	0	0	0	0	0	1	0	0
1	17635	GACCAATCAC.AAGATATTTT	A	C	0	0	0	0	0	0	0	0	0	0	0	1	0	0
1	17644	CAAGATATTT.TGGTTGCCAT	T	A	0	0	0	0	0	0	0	0	0	0	0	1	0	0
1	17676	TCTAATGTGA.CTTGATCATT	C	T	0	1	0	0	0	0	0	0	0	0	0	0	0	0
1	17722	ACTCGCCAAA.GTATTGAACG	G	A	0	1	1	0	0	0	0	0	0	0	1	0	0	0
1	17725	CGCCAAAGTA.TTGAACGATG	T	C	0	1	1	0	0	0	0	0	0	0	1	0	0	0
1	17728	CAAAGTATTG.AACGATGTTG	A	G	0	1	1	0	0	0	0	0	0	0	1	1	0	0
1	17731	AGTATTGAAC.GATGTTGTAG	G	T	0	1	0	0	0	0	0	0	0	0	0	0	0	0
1	17814	TATATTTAAT.AAGTGACTAA	A	G	0	1	1	0	0	0	0	0	0	0	1	1	1	0
1	17818	TTTAATAAGT.GACTAAAAAG	G	A	0	1	1	0	0	0	0	0	0	0	1	1	1	0
1	17819	TTAATAAGTG.ACTAAAAAGT	A	G	0	1	1	0	0	0	0	0	0	0	1	1	1	0
1	17820	TAATAAGTGA.CTAAAAAGTT	C	T	0	1	1	0	0	0	0	0	0	0	1	1	1	0
1	17822	ATAAGTGACT.AAAAAGTTAC	A	G	0	1	0	0	0	0	0	0	0	0	0	1	0	0
1	17823	TAAGTGACTA.AAAAGTTACC	A	G	0	1	1	0	0	0	0	0	0	0	1	1	1	0
1	17826	GTGACTAAAA.AGTTACCCAT	A	T	0	1	1	0	0	0	0	0	0	0	1	1	1	0
1	17827	TGACTAAAAA.GTTACCCATA	G	A	0	1	1	0	0	0	0	0	0	0	1	1	1	0
1	17832	AAAAAGTTAC.CCATATTGAT	C	T	0	1	1	0	0	0	0	0	0	0	1	1	1	0
1	17835	AAGTTACCCA.TATTGATACC	T	C	0	1	1	0	0	0	0	0	0	0	1	1	1	0
1	17839	TACCCATATT.GATACCTGTT	G	C	0	1	1	0	0	0	0	0	0	0	1	1	1	0
1	17845	TATTGATACC.TGTTTACAGA	T	C	0	0	0	0	0	0	0	0	0	0	0	0	0	1
1	17859	TACAGAAAAG.GCTTTTTAGG	G	A	0	1	1	0	0	0	0	0	0	0	1	1	1	1
1	17885	AAATAAGAAG.CCGTTTTCTA	C	T	0	1	0	0	0	0	0	0	0	0	0	0	0	0
1	17888	TAAGAAGCCG.TTTTCTAATG	T	C	0	1	1	0	0	0	0	0	0	0	1	1	1	0
1	17944	TATTTCATTC.GCTAGAAATT	G	A	0	0	0	0	0	0	0	0	0	0	0	1	0	0
1	17945	ATTTCATTCG.CTAGAAATTT	C	T	0	1	1	0	0	0	0	0	0	0	1	1	1	1
1	17965	GCAGAAAAAA.GGGCTTTAAG	G	C	0	1	1	0	0	0	0	0	0	0	1	1	1	1
1	17974	AGGGCTTTAA.GAGGTGAGGC	G	A	0	1	1	0	0	0	0	0	0	0	1	0	1	0
1	17976	GGCTTTAAGA.GGTGAGGCTT	G	A	0	1	1	0	0	0	0	0	0	0	1	1	1	1
1	17983	AGAGGTGAGG.CTTTTTGAAA	C	T	0	1	1	0	0	0	0	0	0	0	1	1	1	0
1	18003	TTATAGATAA.CTACAATTAA	C	G	0	1	1	0	0	0	0	0	0	0	1	1	1	1
1	18009	ATAACTACAA.TTAAGGCAGA	T	A	0	1	1	0	0	0	0	0	0	0	1	1	1	1
1	18032	AGCTTCTATT.GTAAATAAAA	G	A	0	0	0	0	0	0	0	0	0	0	0	0	0	1
1	18098	TTATAAATCA.ACCAATCTAA	A	G	0	1	0	0	0	0	0	0	0	0	0	0	0	0
1	18129	ATAAATGTTC.AGCCAGTCTT	A	G	0	1	0	0	0	0	0	0	0	0	0	0	0	0
1	18161	TGATGATAAC.TATTTAACCA	T	C	0	1	1	0	0	0	0	0	0	0	1	1	0	1
1	18204	TGTCAACGAC.GATACAATCT	G	A	0	0	0	0	0	0	0	0	0	0	1	1	1	1
1	18222	CTAAATGAAT.CGGGCAAAGT	C	G,T	0	0	2	0	0	0	0	0	0	0	0	0	0	1
1	18231	TCGGGCAAAG.TGTCAGCGTT	T	G,A	0	1	1	0	0	0	0	0	0	0	1	0	0	2
1	18234	GGCAAAGTGT.CAGCGTTTCA	C	G	0	0	0	0	0	0	0	0	0	0	0	1	0	0
1	18246	GCGTTTCAAA.TTCTAAGAAA	T	C	0	1	1	0	0	0	0	0	0	0	1	1	1	1
1	18306	CAACCAGATT.TTCAATACGA	T	C	0	1	1	0	0	0	0	0	0	0	0	1	0	1
1	18354	CCGGCTCGTT.GGAAAGAATC	G	A	0	1	1	0	0	0	0	0	0	0	0	0	0	0
1	18399	CATGAATAGG.TGCGTAATAA	T	C	0	1	0	0	0	0	0	0	0	0	0	0	0	0
1	18420	AAAGCACTTG.CGGCCCTTCA	C	T	0	1	1	0	0	0	0	0	0	0	0	0	0	0
1	18423	GCACTTGCGG.CCCTTCATGT	C	T	0	1	1	0	0	0	0	0	0	0	0	0	0	0
1	18432	GCCCTTCATG.TACGTTAAGC	T	C	0	1	1	0	0	0	0	0	0	0	0	0	0	0
1	18456	AGCCTACGCC.GTGACCTGTG	G	A	0	1	1	0	0	0	0	0	0	0	0	0	0	0
1	18465	CGTGACCTGT.GCCGTGGCGA	G	A	0	1	1	0	0	0	0	0	0	0	0	0	0	0
1	18471	CTGTGCCGTG.GCGATAATCT	G	A	0	0	1	0	0	0	0	0	0	0	0	1	0	0
1	18488	TCTAAACCAT.GTTGCCATAA	G	A	0	0	1	0	0	0	0	0	0	0	0	0	0	0
1	18498	GTTGCCATAA.AGTATGGCGA	A	C	0	1	1	0	0	0	0	0	0	0	0	0	0	0
1	18525	AATCGAGTAG.AGGAGCGGCT	A	T	0	1	1	0	0	0	0	0	0	0	0	0	0	0
1	18528	CGAGTAGAGG.AGCGGCTAAA	A	G	0	1	1	0	0	0	0	0	0	0	0	0	0	0
1	18531	GTAGAGGAGC.GGCTAAACCT	G	A	0	1	1	0	0	0	0	0	0	0	0	0	0	0
1	18543	CTAAACCTTC.CGGATAAATC	C	T	0	1	1	0	0	0	0	0	0	0	0	1	1	0
1	18599	GTATAGTCAC.GTTTTTGTTG	G	A	0	0	0	0	0	0	0	0	0	0	0	1	0	0
1	18609	GTTTTTGTTG.CTCTGTTGGT	C	T	0	0	0	0	0	0	0	0	0	0	0	0	0	1
1	18621	CTGTTGGTGT.TCCTACAGGA	T	A	0	0	0	0	0	0	0	0	0	0	0	0	0	1
1	18627	GTGTTCCTAC.AGGAACAACA	A	G	0	0	0	0	0	0	0	0	0	0	0	0	0	1
1	18645	CACGGGTAAT.GTCGGTAGTG	G	A	0	1	1	0	0	0	0	0	0	0	0	0	1	1
1	18648	GGGTAATGTC.GGTAGTGCCG	G	C	0	1	1	0	0	0	0	0	0	0	0	0	1	1
1	18651	TAATGTCGGT.AGTGCCGTCT	A	T	0	1	1	0	0	0	0	0	0	0	0	0	1	1
1	18654	TGTCGGTAGT.GCCGTCTACG	G	T	0	1	1	0	0	0	0	0	0	0	0	0	1	1
1	18657	CGGTAGTGCC.GTCTACGTAT	G	A	0	1	1	0	0	0	0	0	0	0	0	0	1	1
1	18660	TAGTGCCGTC.TACGTATTGT	T	A	0	1	1	0	0	0	0	0	0	0	0	0	1	1
1	18663	TGCCGTCTAC.GTATTGTCCA	G	A	0	1	1	0	0	0	0	0	0	0	0	0	1	1
1	18666	CGTCTACGTA.TTGTCCACCA	T	C	0	1	1	0	0	0	0	0	0	0	0	0	1	1
1	18669	CTACGTATTG.TCCACCAGAA	T	C,G	0	2	2	0	0	0	0	0	0	0	0	0	2	1
1	18672	CGTATTGTCC.ACCAGAATCA	A	G	0	1	1	0	0	0	0	0	0	0	0	0	1	1
1	18678	GTCCACCAGA.ATCAATCAGT	A	G	0	1	1	0	0	0	0	0	0	0	0	0	1	1
1	18681	CACCAGAATC.AATCAGTAAT	A	C	0	0	0	0	0	0	0	0	0	0	0	0	0	1
1	18684	CAGAATCAAT.CAGTAATAGC	C	G	0	1	1	0	0	0	0	0	0	0	0	0	1	1
1	18687	AATCAATCAG.TAATAGCCCA	T	C	0	0	0	0	0	0	0	0	0	0	1	1	0	0
1	18692	ATCAGTAATA.GCCCATCGCC	G	A	0	0	0	0	0	0	0	0	0	0	1	1	0	0
1	18693	TCAGTAATAG.CCCATCGCCT	C	A,G	0	2	2	0	0	0	0	0	0	0	1	1	2	2
1	18705	CATCGCCTTC.AATGAATGAG	A	G	0	0	0	0	0	0	0	0	0	0	0	1	0	1
1	18708	CGCCTTCAAT.GAATGAGTAA	G	A	0	0	0	0	0	0	0	0	0	0	0	1	0	1
1	18714	CAATGAATGA.GTAATGTTCT	G	A	0	0	0	0	0	0	0	0	0	0	0	1	1	1
1	18717	TGAATGAGTA.ATGTTCTTCA	A	G	0	0	0	0	0	0	0	0	0	0	0	1	0	1
1	18720	ATGAGTAATG.TTCTTCAGTT	T	C	0	0	0	0	0	0	0	0	0	0	0	1	0	1
1	18774	AGCCGGCAAT.CGTTGAAAAG	C	T	0	0	0	0	0	0	0	0	0	0	0	1	0	1
1	19362	CTTTACGAGA.TAGGGCATTT	T	G	0	1	0	0	0	0	0	0	0	0	0	0	0	0
1	19374	GGGCATTTAA.TCCTTCAGGC	T	C	0	1	1	0	0	0	0	0	0	0	1	1	1	0
1	19410	CTAAAGGAAG.TTCAGGGCGG	T	C	0	1	0	0	0	0	0	0	0	0	0	0	0	0
1	19413	AAGGAAGTTC.AGGGCGGTTT	A	T	0	0	1	0	0	0	0	0	0	0	1	1	1	0
1	19416	GAAGTTCAGG.GCGGTTTAAC	G	A	0	0	1	0	0	0	0	0	0	0	1	1	0	0
1	19419	GTTCAGGGCG.GTTTAACCAG	G	A	0	0	1	0	0	0	0	0	0	0	1	1	1	0
1	19422	CAGGGCGGTT.TAACCAGATC	T	A	0	0	1	0	0	0	0	0	0	0	1	1	1	0
1	19423	AGGGCGGTTT.AACCAGATCA	A	G	0	0	1	0	0	0	0	0	0	0	1	1	1	0
1	19431	TTAACCAGAT.CAAACCAATT	C	T	0	0	1	0	0	0	0	0	0	0	0	0	0	0
1	19432	TAACCAGATC.AAACCAATTA	A	G	0	0	1	0	0	0	0	0	0	0	1	0	1	1
1	19434	ACCAGATCAA.ACCAATTAAA	A	G	0	0	0	0	0	0	0	0	0	0	0	1	0	0
1	19435	CCAGATCAAA.CCAATTAAAT	C	T	0	0	0	0	0	0	0	0	0	0	1	0	0	0
1	19450	TAAATCTTGC.TGTGTTTCAA	T	C	0	0	0	0	0	0	0	0	0	0	0	0	1	0
1	19471	CTTAAAGCCA.AGTTGCTTTG	A	C	0	1	1	0	0	0	0	0	0	0	1	1	1	0
1	19472	TTAAAGCCAA.GTTGCTTTGC	G	A	0	0	0	0	0	0	0	0	0	0	0	0	1	0
1	19506	CTTTAAATTG.TTGGATTGAA	T	C	0	1	1	0	0	0	0	0	0	0	1	1	1	1
1	19548	TAACCGAACC.CGCCGGTAGA	C	A	0	1	1	0	0	0	0	0	0	0	1	1	0	1
1	19575	CAATCCATGC.GAGATGGGTA	G	A	0	0	0	0	0	0	0	0	0	0	0	0	0	1
1	19581	ATGCGAGATG.GGTAGAAGAT	G	T	0	1	1	0	0	0	0	0	0	0	1	1	1	1
1	19603	ATCACTGGTC.AGTTTTTGTA	A	T	0	0	0	0	0	0	0	0	0	0	1	0	0	0
1	19614	GTTTTTGTAA.CTGAAAGCCA	C	T	0	0	1	0	0	0	0	0	0	0	0	1	1	0
1	19638	CAGCGAGTTG.CTGTTCGGCT	C	T	0	1	1	0	0	0	0	0	0	0	1	1	1	1
1	19662	CCCAATAGCG.CCCATCGGCC	C	T	0	1	0	0	0	0	0	0	0	0	0	0	0	0
1	19668	AGCGCCCATC.GGCCCAGAGT	G	A	0	0	0	0	0	0	0	0	0	0	0	1	0	1
1	19686	GTCCTGCAAA.GTTTTGGGTC	G	A	0	0	1	0	0	0	0	0	0	0	1	0	0	0
1	19700	TGGGTCACAA.CTAAAGTGCC	C	A	0	1	0	0	0	0	0	0	0	0	0	0	0	0
1	19794	CTGCACTCAT.GACAACCAAA	G	A	0	0	0	0	0	0	0	0	0	0	1	1	0	1
1	19805	ACAACCAAAG.CATCAATACT	C	T	0	0	0	0	0	0	0	0	0	0	0	1	0	0
1	20022	AATACCATCT.GCCGAGACTT	G	A	0	1	0	0	0	0	0	0	0	0	0	0	0	0
1	20054	AACCTGCCAT.AAGGTTGCCA	A	G	0	1	1	0	0	0	0	0	0	0	1	0	1	1
1	20215	GGTGAAACTA.CTCCGCCATG	C	A	0	0	0	0	0	0	0	0	0	0	1	0	0	0
1	20218	GAAACTACTC.CGCCATGAAT	C	T	0	0	1	0	0	0	0	0	0	0	0	0	0	0
1	20219	AAACTACTCC.GCCATGAATA	G	A	0	0	0	0	0	0	0	0	0	0	0	0	1	0
1	20248	CTGGCTAGAG.ACATAAGTAA	A	C	0	0	0	0	0	0	0	0	0	0	1	0	0	0
1	20270	AGCCACCTGC.TGCGAATAAC	T	G	0	1	0	0	0	0	0	0	0	0	0	0	0	1
1	20321	GATCTTTATT.CGCTTTACCT	C	T	0	0	0	0	0	0	0	0	0	0	0	0	1	0
1	20333	CTTTACCTAG.CTTCGCCCAT	C	T	0	1	1	0	0	0	0	0	0	0	1	0	1	0
1	20336	TACCTAGCTT.CGCCCATAGC	C	A,T	0	0	0	0	0	0	0	0	0	0	0	0	2	1
1	20357	AAGCTGCAAC.TGGAGCAAAG	T	G	0	0	0	0	0	0	0	0	0	0	0	1	0	0
1	20408	ACCATACAGT.TGGGATTTCA	T	C,G	0	2	2	0	0	0	0	0	0	0	1	0	1	0
1	20411	ATACAGTTGG.GATTTCAAAT	G	A	0	1	1	0	0	0	0	0	0	0	0	0	0	0
1	20414	CAGTTGGGAT.TTCAAATCCG	T	C	0	1	1	0	0	0	0	0	0	0	0	0	0	0
1	20468	AAGTAAAAGT.CGTGGGTTTT	C	T	0	1	1	0	0	0	0	0	0	0	1	0	1	1
1	20495	AAGCTGACCA.AAATAGGGCA	A	G	0	1	0	0	0	0	0	0	0	0	1	0	1	1
1	20512	GCAGAGGCTG.CTAATAAAAC	C	T	0	0	0	0	0	0	0	0	0	0	0	0	1	0
1	20567	CTAAATTCAG.GAAAAGTAGT	G	A	0	0	0	0	0	0	0	0	0	0	1	0	0	0
1	20573	TCAGGAAAAG.TAGTAAATAT	T	A	0	0	1	0	0	0	0	0	0	0	0	0	1	1
1	20605	ATAATCCCAA.TGCTAATACC	T	A	0	1	0	0	0	0	0	0	0	0	0	0	0	0
1	20612	CAATGCTAAT.ACCTACGGTT	A	T	0	1	0	0	0	0	0	0	0	0	1	0	0	0
1	20630	TTAAATAGGT.TGCGACAGCG	T	C	0	0	1	0	0	0	0	0	0	0	1	0	1	1
1	20639	TTGCGACAGC.GACGGGATTG	G	C	0	1	1	0	0	0	0	0	0	0	0	0	1	1
1	20663	GAATGATACC.GAGGAAGGTT	G	A	0	0	1	0	0	0	0	0	0	0	1	0	1	1
1	20668	ATACCGAGGA.AGGTTAGCGC	A	T	0	0	0	0	0	0	0	0	0	0	0	0	1	0
1	20685	CGCAATAACG.ACTGCAACTG	A	G	0	0	0	0	0	0	0	0	0	0	0	0	1	0
1	20695	ACTGCAACTG.CGAATAAAAA	C	T	0	0	0	0	0	0	0	0	0	0	1	0	0	0
1	20723	CAATTTTAGG.CGCATTTTTA	C	T	0	0	0	0	0	0	0	0	0	0	0	0	0	1
1	20741	TATTTTCTAC.AACAGGTTTG	A	G	0	1	1	0	0	0	0	0	0	0	1	0	1	1
1	20762	TACAGCTATT.GGCTTCTTGG	G	A	0	0	0	0	0	0	0	0	0	0	0	1	0	0
1	20786	GCTCATTAAA.TGTTTGGAGC	T	A	0	1	0	0	0	0	0	0	0	0	1	0	1	1
1	20792	TAAATGTTTG.GAGCTGAGGC	G	A	0	1	0	0	0	0	0	0	0	0	0	0	1	0
1	20798	TTTGGAGCTG.AGGCATTGCC	A	G	0	1	0	0	0	0	0	0	0	0	0	0	1	0
1	20861	CAATACCAAA.GCCTAAATGC	G	A	0	1	0	0	0	0	0	0	0	0	0	0	0	1
1	20927	ATGACCCCAT.GTTAATTCCC	G	A	0	1	0	0	0	0	0	0	0	0	0	0	0	0
1	20971	TCACGTCTTG.CATCATTGGC	C	A	0	1	0	0	0	0	0	0	0	0	0	0	0	0
1	20972	CACGTCTTGC.ATCATTGGCT	A	G	0	0	1	0	0	0	0	0	0	0	0	0	1	0
1	20999	GTGTTCCCAC.GATCACGGAA	G	A	0	1	0	0	0	0	0	0	0	0	0	0	0	0
1	21005	CCACGATCAC.GGAAATACAT	G	A	0	1	0	0	0	0	0	0	0	0	0	0	0	0
1	21026	TTTTAAATAA.TCCGGTACCT	T	C	0	1	0	0	0	0	0	0	0	0	1	0	0	0
1	21029	TAAATAATCC.GGTACCTAAA	G	T	0	1	0	0	0	0	0	0	0	0	1	0	0	0
1	21071	AAAAGAAAGA.TTGATCAAAT	T	C	0	1	0	0	0	0	0	0	0	0	1	0	0	0
1	21077	AAGATTGATC.AAATACAGAT	A	G	0	0	0	0	0	0	0	0	0	0	0	1	0	0
1	21086	CAAATACAGA.TGTAAGGGCA	T	C	0	0	0	0	0	0	0	0	0	0	0	1	0	0
1	21092	CAGATGTAAG.GGCAATTGAT	G	A	0	0	1	0	0	0	0	0	0	0	0	0	0	0
1	21107	TTGATAAGTG.ACCTAAGGCA	A	G	0	1	1	0	0	0	0	0	0	0	1	1	0	0
1	21167	ACCAGTTATC.AGCAACCCAT	A	G,T	0	1	1	0	0	0	0	0	0	0	1	2	0	0
1	21176	CAGCAACCCA.TCCCCCAAAA	T	C	0	1	1	0	0	0	0	0	0	0	1	1	1	1
1	21179	CAACCCATCC.CCCAAAAACG	C	T	0	0	1	0	0	0	0	0	0	0	0	0	0	0
1	21221	CAAATAATCC.AACAATCGCT	A	G	0	1	1	0	0	0	0	0	0	0	0	1	0	0
1	21227	ATCCAACAAT.CGCTGCGGCA	C	T	0	0	1	0	0	0	0	0	0	0	0	0	0	0
1	21261	TGCTAGACCG.CCGTCATTGA	C	T	0	0	0	0	0	0	0	0	0	0	1	0	0	0
1	21293	TATAAAGAAC.GAGTAAGGGT	G	A	0	0	1	0	0	0	0	0	0	0	0	0	0	0
1	21302	CGAGTAAGGG.TCGGATTCCA	T	C	0	1	1	0	0	0	0	0	0	0	1	1	1	1
1	21445	TAAGTTTTTT.GTAAACATAA	G	A	0	1	1	0	0	0	0	0	0	0	1	1	1	1
1	21585	TTATTTTTTG.CTGAGTAATG	C	T	0	0	1	0	0	0	0	0	0	0	0	0	0	0
1	21586	TATTTTTTGC.TGAGTAATGT	T	C	0	0	1	0	0	0	0	0	0	0	0	0	0	0
1	21604	GTGAGATCTA.CTATATGTGG	C	T	0	0	1	0	0	0	0	0	0	0	0	0	0	0
1	21630	TAACTGCTTA.GATAGCGACT	G	A	0	0	0	0	0	0	0	0	0	0	1	0	0	0
1	21731	ATGGTTTAAG.TCATAAATTT	T	G	0	0	0	0	0	0	0	0	0	0	0	1	0	1
1	21746	AATTTAAGTT.GCTGAAATAA	G	A	0	0	0	0	0	0	0	0	0	0	0	0	0	1
1	21747	ATTTAAGTTG.CTGAAATAAA	C	A	0	0	0	0	0	0	0	0	0	0	1	0	0	1
1	21762	ATAAACCAAA.GGAACTCATT	G	A	0	0	0	0	0	0	0	0	0	0	0	0	0	1
1	21781	TGGGGAAGAT.CGATGTCAAA	C	T	0	0	0	0	0	0	0	0	0	0	1	0	0	0
1	21785	GAAGATCGAT.GTCAAAGGAG	G	C,A	0	2	1	0	0	0	0	0	0	0	0	0	0	0
1	21789	ATCGATGTCA.AAGGAGTGAT	A	C	0	0	0	0	0	0	0	0	0	0	1	0	0	0
1	21795	GTCAAAGGAG.TGATTATTTT	T	G	0	0	0	0	0	0	0	0	0	0	0	0	0	1
1	21814	TCAAGTAATC.CGATAAGAAT	C	A	0	0	1	0	0	0	0	0	0	0	0	0	0	0
1	21912	AATTTTGCAC.TAAATTAGGG	T	C	0	1	0	0	0	0	0	0	0	0	0	0	0	0
1	22022	GGGGCCTAAA.GCATGAATAC	G	T	0	0	0	0	0	0	0	0	0	0	1	1	0	1
1	22039	TACTTATAAG.CAATTCAATG	C	T	0	0	1	0	0	0	0	0	0	0	1	1	0	1
1	22242	AAGAACAGCA.CGTAACTTAC	C	T	0	0	0	0	0	0	0	0	0	0	0	0	1	0
1	22359	TTTTACGTCC.GGATGCAGAA	G	A	0	0	0	0	0	0	0	0	0	0	0	0	0	1
1	22617	TCGCTGAAGA.AGCTGCTTGG	A	G	0	1	0	0	0	0	0	0	0	0	0	0	0	0
1	22650	ATTACGAGTC.TGGTAACTCA	T	A	0	0	0	0	0	0	0	0	0	0	1	0	0	1
1	22722	CTGCACAAGA.CATGCGTGCA	C	T	0	1	1	0	0	0	0	0	0	0	1	1	1	1
1	22758	TTGAAGACAT.CATGGGCCCA	C	T	0	1	0	0	0	0	0	0	0	0	0	1	0	0
1	22764	ACATCATGGG.CCCAGGTCGT	C	T	0	1	0	0	0	0	0	0	0	0	1	0	0	0
1	22836	GCTTCAATAC.CCTTGTTCGT	C	G,T	0	1	2	0	0	0	0	0	0	0	0	0	1	1
1	22842	ATACCCTTGT.TCGTAAAGCT	T	A	0	1	1	0	0	0	0	0	0	0	0	0	1	1
1	22917	AAACAGCTAC.GTTTATGCCT	G	T	0	0	0	0	0	0	0	0	0	0	0	0	0	1
1	22962	CTGGTATGCA.CGTTCACATG	C	T	0	0	0	0	0	0	0	0	0	0	1	1	0	0
1	22989	CTAAAGATGG.TAAGAACTTG	T	C	0	0	1	0	0	0	0	0	0	0	0	1	0	1
1	23163	CTTACTCAGC.GCGTAACCGT	G	A	0	0	0	0	0	0	0	0	0	0	1	0	1	1
1	23178	ACCGTTCTGC.ATCTATCCGT	A	G	0	1	0	0	0	0	0	0	0	0	1	1	1	1
1	23214	ACCCTAAAGG.TAAACGTATC	T	C	0	1	0	0	0	0	0	0	0	0	0	0	0	0
1	23217	CTAAAGGTAA.ACGTATCGAA	A	G	0	1	0	0	0	0	0	0	0	0	1	0	1	0
1	23277	TCGCTGCGTT.GTTAATGGCT	G	A	0	1	0	0	0	0	0	0	0	0	0	0	1	1
1	23295	CTGGTATCGA.CGGTATCCAA	C	T	0	0	1	0	0	0	0	0	0	0	0	0	0	0
1	23301	TCGACGGTAT.CCAAAACAAG	C	T	0	0	1	0	0	0	0	0	0	0	0	0	0	0
1	23334	AAGCTGCTGA.TAAGAACTTG	T	C	0	1	0	0	0	0	0	0	0	0	1	1	0	1
1	23337	CTGCTGATAA.GAACTTGTAT	G	A	0	0	0	0	0	0	0	0	0	0	0	0	0	1
1	23343	ATAAGAACTT.GTATGATCTT	G	A	0	0	0	0	0	0	0	0	0	0	0	0	1	0
1	23346	AGAACTTGTA.TGATCTTCCT	T	C	0	1	1	0	0	0	0	0	0	0	0	0	0	1
1	23395	TGCTCATAGC.CTAGATATGG	C	T	0	0	0	0	0	0	0	0	0	0	0	0	1	0
1	23448	TGTTAAAAGG.CGGCGTGTTC	C	T	0	1	0	0	0	0	0	0	0	0	0	0	0	0
1	23481	TTGATGCATA.CATCGAACTT	C	T	0	0	0	0	0	0	0	0	0	0	0	1	0	0
1	23553	ATATGTACTA.CAGCCTGTAA	C	T	0	0	0	0	0	0	0	0	0	0	0	0	0	1
1	23724	GCAGGAAAAG.ACTTTAAATC	A	G	0	0	0	0	0	0	0	0	0	0	1	0	0	0
1	23798	AGCTGGGTGG.TGGGAAGTTC	T	G	0	0	0	0	0	0	0	0	0	0	0	0	1	1
1	23803	GGTGGTGGGA.AGTTCAGCGT	A	G	0	0	0	0	0	0	0	0	0	0	0	0	1	0
1	23876	TGAACATGCC.CCATACTCAC	C	T	0	0	0	0	0	0	0	0	0	0	0	0	0	1
1	23882	TGCCCCATAC.TCACACTTCT	T	C	0	1	0	0	0	0	0	0	0	0	0	1	1	1
1	23897	CTTCTTGGGT.AAGGGAAACC	A	G	0	0	1	0	0	0	0	0	0	0	0	0	0	0
1	23933	ATGTAGAGCC.TTGGGTGAAA	T	G,C	0	1	0	0	0	0	0	0	0	0	0	1	2	1
1	23960	GTATTTTTCC.AATTCAAAGT	A	C	0	1	0	0	0	0	0	0	0	0	0	1	1	1
1	24014	GTTCTAAGCC.GATAGGTCTT	G	A	0	1	0	0	0	0	0	0	0	0	0	1	1	1
1	24077	TTCGTTTACC.TGAAGGCTGG	T	A	0	1	1	0	0	0	0	0	0	0	1	0	1	1
1	24101	GACAAAGTTG.CTATACTTGG	C	T	0	0	1	0	0	0	0	0	0	0	1	0	0	0
1	24340	TACCGAATTT.AGGTATTTTA	A	G	0	1	1	0	0	0	0	0	0	0	0	0	0	0
1	24454	CAAAAACACG.TCCGTTAGCA	T	C	0	0	0	0	0	0	0	0	0	0	0	0	1	0
1	24457	AAACACGTCC.GTTAGCAACA	G	T	0	1	1	0	0	0	0	0	0	0	1	0	1	0
1	24481	TTATTCGAGC.CAGAGAAGCA	C	A	0	1	1	0	0	0	0	0	0	0	1	0	1	0
1	24604	TTTATCCATT.TATGAAACGC	T	C	0	0	0	0	0	0	0	0	0	0	0	0	1	0
1	24713	GACTTGCTGG.TTGCTCTATT	T	C	0	1	1	0	0	0	0	0	0	0	1	0	0	0
1	24718	GCTGGTTGCT.CTATTTTGGT	C	G	0	1	1	0	0	0	0	0	0	0	1	0	0	0
1	24775	CAATTACAGA.CCGTGAATAT	C	T	0	0	0	0	0	0	0	0	0	0	1	1	0	1
1	24778	TTACAGACCG.TGAATATGAT	T	C	0	0	0	0	0	0	0	0	0	0	1	1	0	1
1	24781	CAGACCGTGA.ATATGATTTA	A	G	0	1	1	0	0	0	0	0	0	0	0	0	0	0
1	24811	TGAAATCTAC.AGCTATTCTT	A	C	0	1	1	0	0	0	0	0	0	0	0	0	1	0
1	24943	TAGTTGTAGT.GGCATTTGAT	G	A	0	0	0	0	0	0	0	0	0	0	0	0	0	1
1	24956	ATTTGATTTT.ATATATCAAA	A	G	0	1	1	0	0	0	0	0	0	0	0	0	0	0
1	24994	GCAACCCTCA.GGTATGTTTT	G	A	0	0	0	0	0	0	0	0	0	0	0	0	0	1
1	24997	ACCCTCAGGT.ATGTTTTTGG	A	C	0	0	0	0	0	0	0	0	0	0	0	0	0	1
1	25012	TTTGGGCATT.CCGTCACAAT	C	T	0	0	0	0	0	0	0	0	0	0	0	0	0	1
1	25039	TTGGATTAAT.CATTTTTCTA	C	A	0	0	0	0	0	0	0	0	0	0	1	0	0	0
1	25213	TTTAGCTATA.ACATTATCAA	A	G	0	0	0	0	0	0	0	0	0	0	0	0	1	0
1	26735	GAGTTTGAAG.GACTTATGAG	G	A	0	1	1	0	0	0	0	0	0	0	1	1	1	1
1	26862	CTCAGAATAA.GAAACAATAT	G	A	0	0	0	0	0	0	0	0	0	0	1	0	0	0
1	26865	AGAATAAGAA.ACAATATGAA	A	G	0	0	0	0	0	0	0	0	0	0	1	0	0	0
1	26873	AAACAATATG.AACAGCAGCG	A	G	0	0	0	0	0	0	0	0	0	0	0	1	0	0
1	26917	TGAGAAAGAA.ACTGCCAATT	A	G	0	1	1	0	0	0	0	0	0	0	1	1	1	1
1	27046	CACGAAGACG.ATCTTCTTCG	A	G	0	1	0	0	0	0	0	0	0	0	0	0	0	0
1	27055	GATCTTCTTC.GACTTTCTCA	G	T	0	1	1	0	0	0	0	0	0	0	0	1	1	0
1	27160	ACTGACTACG.GACCTTATAA	G	A	0	1	1	0	0	0	0	0	0	0	1	1	1	1
1	27162	TGACTACGGA.CCTTATAATC	C	T	0	0	1	0	0	0	0	0	0	0	0	0	1	0
1	27169	GGACCTTATA.ATCATTACTG	A	G	0	0	0	0	0	0	0	0	0	0	1	0	0	0
1	27175	TATAATCATT.ACTGGTTATT	A	G	0	0	0	0	0	0	0	0	0	0	1	0	0	0
1	27181	CATTACTGGT.TATTAATGCG	T	G	0	0	0	0	0	0	0	0	0	0	1	0	0	0
1	27210	ACTTGTGCTA.AAACATGATA	A	G	0	1	1	0	0	0	0	0	0	0	0	0	1	1
1	27232	TTGGGAAACT.TTGTTTTAAG	T	C	0	1	1	0	0	0	0	0	0	0	1	1	1	1
1	27289	GACGGGCAAA.AAATTTTTGT	A	G	0	1	1	0	0	0	0	0	0	0	0	1	1	1
1	27292	GGGCAAAAAA.TTTTTGTTTT	T	C	0	1	1	0	0	0	0	0	0	0	0	1	1	0
1	27301	ATTTTTGTTT.TGGAAATAAA	T	G	0	0	1	0	0	0	0	0	0	0	0	0	0	1
1	27316	ATAAATAAGG.ACGTAAACAA	A	G	0	0	0	0	0	0	0	0	0	0	0	0	0	1
1	27376	TAAAAAATAA.GTGACTCGAT	G	A	0	0	0	0	0	0	0	0	0	0	0	0	0	1
1	27388	GACTCGATTC.GAACATGTGA	G	A	0	0	1	0	0	0	0	0	0	0	0	0	1	0
1	28094	AGAAAGTTGC.GATGTATTTA	G	A	0	0	0	0	0	0	0	0	0	0	1	0	0	0
1	28115	GACGTAAGTT.ACGGAAATCG	A	G	0	0	1	0	0	0	0	0	0	0	0	1	0	0
1	28124	TACGGAAATC.GATGTAGTAA	G	A	0	0	0	0	0	0	0	0	0	0	1	0	0	0
1	28136	TGTAGTAAGC.GTGTTCCCAT	G	A	0	0	0	0	0	0	0	0	0	0	0	0	0	1
1	28339	TCAATTTTAG.CAGCGATTGC	C	T	0	0	0	0	0	0	0	0	0	0	1	0	0	0
1	28397	TCCAGTAGAA.AGTGTGGTTC	A	G	0	0	0	0	0	0	0	0	0	0	1	0	0	0
1	28463	CAGCAGTTGC.CTTAATGATT	C	T	0	1	1	0	0	0	0	0	0	0	1	1	1	1
1	28550	TGTGGTGTTT.GTCGTGATGG	G	A	0	0	1	0	0	0	0	0	0	0	1	1	0	1
1	28833	TAGCAAACTG.TTTTGAAATT	T	C	0	0	0	0	0	0	0	0	0	0	0	1	0	0
1	28910	TAATGAACGC.CTAATTCTTT	C	T	0	0	1	0	0	0	0	0	0	0	0	0	0	0
1	28938	AAAAAGTTCG.TTCACTGACT	T	C	0	0	0	0	0	0	0	0	0	0	0	0	1	0
1	28950	CACTGACTTC.GCCTGAAATA	G	A	0	0	0	0	0	0	0	0	0	0	0	0	1	0
1	28956	CTTCGCCTGA.AATATAAGCA	A	G	0	0	0	0	0	0	0	0	0	0	0	0	1	0
1	28968	TATAAGCATC.GCAATTTTGT	G	A	0	0	0	0	0	0	0	0	0	0	0	0	1	0
1	28977	CGCAATTTTG.TAAAGCAGCT	T	C	0	0	0	0	0	0	0	0	0	0	0	0	1	0
1	28983	TTTGTAAAGC.AGCTTTAGCA	A	C	0	0	0	0	0	0	0	0	0	0	0	0	1	0
1	28990	AGCAGCTTTA.GCAATAAAAT	G	A	0	0	0	0	0	0	0	0	0	0	0	1	0	0
1	29001	CAATAAAATC.TTGAGCACCG	T	C	0	0	0	0	0	0	0	0	0	0	0	0	1	0
1	29007	AATCTTGAGC.ACCGCCTGTA	A	C	0	0	0	0	0	0	0	0	0	0	0	0	1	0
1	29010	CTTGAGCACC.GCCTGTACAG	G	A	0	0	0	0	0	0	0	0	0	0	0	0	1	0
1	29037	CTTTTTGAAT.ACTTTGTTTT	A	G	0	0	0	0	0	0	0	0	0	0	0	0	1	0
1	29081	AAATCAAAAC.TGTTTTGTAG	T	C	0	0	1	0	0	0	0	0	0	0	0	0	0	0
1	29114	TCCTCTACAG.GAAGCGCTTG	G	A	0	1	1	0	0	0	0	0	0	0	1	1	1	1
1	29136	CTAAATAACC.AATATTACCA	A	G	0	0	1	0	0	0	0	0	0	0	0	0	0	0
1	29157	TTGGATGTTT.CTCGGTTAGA	C	T	0	0	0	0	0	0	0	0	0	0	0	1	0	0
1	29160	GATGTTTCTC.GGTTAGATCA	G	A	0	1	1	0	0	0	0	0	0	0	1	0	0	1
1	29165	TTCTCGGTTA.GATCAAGTGG	G	A	0	0	0	0	0	0	0	0	0	0	0	1	0	0
1	29169	CGGTTAGATC.AAGTGGTTCT	A	G	0	0	0	0	0	0	0	0	0	0	0	1	0	0
1	29175	GATCAAGTGG.TTCTAAATTT	T	C	0	1	0	0	0	0	0	0	0	0	1	1	0	1
1	29184	GTTCTAAATT.TTGTAAGTTT	T	C	0	1	0	0	0	0	0	0	0	0	1	1	0	0
1	29186	TCTAAATTTT.GTAAGTTTAG	G	T	0	1	0	0	0	0	0	0	0	0	1	1	0	0
1	29187	CTAAATTTTG.TAAGTTTAGT	T	C	0	1	0	0	0	0	0	0	0	0	1	1	0	0
1	29223	TATTATTGCC.TAAACTTGGA	T	C	0	1	0	0	0	0	0	0	0	0	1	1	0	1
1	29227	ATTGCCTAAA.CTTGGATGTG	C	T	0	0	0	0	0	0	0	0	0	0	0	0	0	1
1	29229	TGCCTAAACT.TGGATGTGCA	T	C	0	1	1	0	0	0	0	0	0	0	1	1	1	1
1	29316	GCATACCAGT.AATTGGATAT	A	G	0	1	0	0	0	0	0	0	0	0	0	1	0	1
1	29322	CAGTAATTGG.ATATGGTTCG	A	G	0	1	0	0	0	0	0	0	0	0	0	1	0	1
1	29325	TAATTGGATA.TGGTTCGCCT	T	C	0	1	1	0	0	0	0	0	0	0	0	1	0	1
1	29364	GTACGAGTAA.GAGATCGGCA	G	T	0	0	0	0	0	0	0	0	0	0	0	1	0	1
1	29370	GTAAGAGATC.GGCATTCTGA	G	A	0	0	1	0	0	0	0	0	0	0	0	0	0	0
1	29378	TCGGCATTCT.GAGCAATGGC	G	T	0	0	1	0	0	0	0	0	0	0	0	0	0	0
1	29385	TCTGAGCAAT.GGCTGCATCA	G	T	0	1	0	0	0	0	0	0	0	0	1	1	0	1
1	29397	CTGCATCAAT.TGCATCTTCA	T	C	0	1	0	0	0	0	0	0	0	0	1	1	0	1
1	29415	CAGAAGCAGT.TACTGCACAA	T	C,A	0	1	0	0	0	0	0	0	0	0	1	0	2	1
1	29418	AAGCAGTTAC.TGCACAAAGA	T	C	0	0	0	0	0	0	0	0	0	0	0	0	1	0
1	29905	AACGGGCGGG.GTGGTGTCTT	G	A	0	0	0	0	0	0	0	0	0	0	0	0	1	0
1	30006	TAAGTGATCC.GGTATTCCGT	G	A	0	1	0	0	0	0	0	0	0	0	0	0	0	1
1	30102	CCGATGGTTA.CATTCTCACC	C	T	0	1	1	0	0	0	0	0	0	0	0	0	0	1
1	30168	ATGATGGACG.CCGAGCAGAA	C	T,G	0	1	0	0	0	0	0	0	0	0	0	1	2	1
1	30192	CAATTGTTGG.CACCGACCCT	C	T	0	0	0	0	0	0	0	0	0	0	0	1	0	0
1	30207	ACCCTGATAC.AGATTTGGCG	A	G	0	0	0	0	0	0	0	0	0	0	0	1	0	0
1	30213	ATACAGATTT.GGCGGTTATT	G	A	0	1	0	0	0	0	0	0	0	0	0	0	0	0
1	30243	TAGATAAATT.GCCAGTATTG	G	A	0	1	1	0	0	0	0	0	0	0	1	0	1	1
1	30291	GTGATGTTGT.TTTAGCAATT	T	G	0	0	0	0	0	0	0	0	0	0	0	0	0	1
1	30297	TTGTTTTAGC.AATTGGTAAC	A	G	0	1	1	0	0	0	0	0	0	0	1	0	0	1
1	30321	TTGGCGTAGG.GCAAACTGTA	G	A	0	1	0	0	0	0	0	0	0	0	0	0	0	1
1	30327	TAGGGCAAAC.TGTAACTCAA	T	A	0	1	1	0	0	0	0	0	0	0	1	0	0	1
1	30330	GGCAAACTGT.AACTCAAGGG	A	C	0	1	1	0	0	0	0	0	0	0	1	0	0	1
1	30354	TTTCAGCAAC.CGGTCGTTCT	C	G	0	1	0	0	0	0	0	0	0	0	0	0	0	1
1	30360	CAACCGGTCG.TTCTGATTTA	T	C	0	1	1	0	0	0	0	0	0	0	1	1	1	1
1	30375	ATTTAGGTAT.TAATACCTAT	T	C	0	0	1	0	0	0	0	0	0	0	0	0	0	0
1	30396	AAGACTTTAT.CCAAACTGAT	C	T	0	1	1	0	0	0	0	0	0	0	1	0	0	1
1	30417	CTGCAATTAA.CCCAGGTAAC	C	T	0	0	1	0	0	0	0	0	0	0	1	0	0	1
1	30435	ACTCAGGTGG.CGCATTAATC	C	T	0	0	1	0	0	0	0	0	0	0	1	0	0	1
1	30450	TAATCGATGT.GGCTGGTAAC	G	A	0	0	0	0	0	0	0	0	0	0	0	1	0	0
1	30501	AATCGGGTGG.CTCTTTAGGT	C	T	0	0	0	0	0	0	0	0	0	0	0	0	1	0
1	30510	GCTCTTTAGG.TATTGGCTTC	T	A	0	1	0	0	0	0	0	0	0	0	0	0	0	0
1	30642	TGGCACCTAA.GCAGCAAGTA	G	A	0	1	0	0	0	0	0	0	0	0	0	0	0	0
1	30651	AGCAGCAAGT.AGGTGTAGTG	A	G	0	1	0	0	0	0	0	0	0	0	0	0	0	0
1	30660	TAGGTGTAGT.GGTTGCTGAT	G	T	0	1	0	0	0	0	0	0	0	0	0	0	0	0
1	30687	AAAATGGTCC.AGCAGATGCT	A	G	0	1	1	0	0	0	0	0	0	0	1	0	1	1
1	30699	CAGATGCTGC.AGGAATTAAA	A	G	0	1	0	0	0	0	0	0	0	0	0	0	0	0
1	30702	ATGCTGCAGG.AATTAAAGTT	A	G	0	1	1	0	0	0	0	0	0	0	1	0	0	0
1	30714	TTAAAGTTGG.CGATAAAATT	C	A	0	0	0	0	0	0	0	0	0	0	0	0	0	1
1	30744	ATAATGAGCC.GATCACTTCA	G	A	0	0	1	0	0	0	0	0	0	0	1	0	0	0
1	30783	ATGTCGCTTT.GCAAGCACCA	G	A	0	0	0	0	0	0	0	0	0	0	0	0	1	1
1	30828	AAAGAGAAGG.TAAACAACAA	T	C	0	0	0	0	0	0	0	0	0	0	0	0	1	1
1	30849	ACTATGTTGT.AACGGTAGGT	A	G	0	1	1	0	0	0	0	0	0	0	0	0	0	0
1	30852	ATGTTGTAAC.GGTAGGTGAG	G	A	0	0	0	0	0	0	0	0	0	0	1	0	0	0
1	30888	CACAATCTCA.GTATATTCCG	G	A	0	0	0	0	0	0	0	0	0	0	0	0	1	0
1	30957	TTTTATTGTT.GTTCATTAGG	G	A	0	0	1	0	0	0	0	0	0	0	0	0	0	0
1	30960	TATTGTTGTT.CATTAGGAGT	C	T	0	1	0	0	0	0	0	0	0	0	0	0	0	1
1	31049	CAATTTCAGC.ACCCTTAATG	A	C	0	0	0	0	0	0	0	0	0	0	0	1	0	0
1	31064	TAATGTTCTC.TGGTAAATCT	T	C	0	0	0	0	0	0	0	0	0	0	0	0	0	1
1	31088	CTTTAATGGA.GCGAACAATT	G	A	0	0	0	0	0	0	0	0	0	0	0	0	0	1
1	31103	CAATTTGCAT.TGCTTCACGC	T	G	0	1	1	0	0	0	0	0	0	0	1	1	1	1
1	31139	GATATGGACG.ATCTTCTAGT	A	G	0	0	1	0	0	0	0	0	0	0	0	0	0	1
1	31172	TTGCATCACA.CTCGCAGGCT	C	T	0	1	0	0	0	0	0	0	0	0	0	1	0	0
1	31186	CAGGCTTGTA.CAAAAGCTTC	C	T	0	0	0	0	0	0	0	0	0	0	0	0	1	0
1	31208	CTCTTTCTGG.GCGACGTAAA	G	A	0	0	1	0	0	0	0	0	0	0	0	1	1	0
1	31274	ACATAATCTG.ATGACATTTT	A	G	0	0	0	0	0	0	0	0	0	0	0	1	0	0
1	31295	AATGTTCTTT.ACAAACAGAT	A	G	0	0	0	0	0	0	0	0	0	0	0	1	1	1
1	31298	GTTCTTTACA.AACAGATAAT	A	C	0	0	0	0	0	0	0	0	0	0	0	0	1	1
1	31301	CTTTACAAAC.AGATAATGCC	A	T	0	0	0	0	0	0	0	0	0	0	0	0	1	1
1	31307	AAACAGATAA.TGCCAATTGT	T	G	0	1	1	0	0	0	0	0	0	0	0	1	0	0
1	31310	CAGATAATGC.CAATTGTTTG	C	T	0	1	1	0	0	0	0	0	0	0	0	1	0	0
1	31322	ATTGTTTGGT.CTGTGTCGGA	C	T	0	0	1	0	0	0	0	0	0	0	0	0	0	0
1	31358	ATAATTGGGT.AACTGGCTTA	A	G	0	0	0	0	0	0	0	0	0	0	0	1	0	0
1	31370	CTGGCTTAAT.TCCACGTTCT	T	C	0	1	1	0	0	0	0	0	0	0	0	1	0	0
1	31373	GCTTAATTCC.ACGTTCTTCA	A	G	0	1	1	0	0	0	0	0	0	0	0	1	0	0
1	31394	GCATGATATG.ACGAGGAAGT	A	G	0	1	1	0	0	0	0	0	0	0	0	1	0	0
1	31406	GAGGAAGTTC.TTCAGCTGGA	T	C	0	0	0	0	0	0	0	0	0	0	0	1	0	0
1	31409	GAAGTTCTTC.AGCTGGAGTG	A	G	0	1	1	0	0	0	0	0	0	0	0	1	0	0
1	31439	CAAGATCATG.CACTAAAACA	C	T	0	0	0	0	0	0	0	0	0	0	0	1	0	0
1	31505	ATGACATTAA.GGTATGAATG	G	A	0	1	1	0	0	0	0	0	0	0	1	1	1	1
1	31517	TATGAATGCC.ACAATCCACT	A	G	0	1	1	0	0	0	0	0	0	0	1	0	0	0
1	31544	GATATTCGGG.GCGTTGAGGC	G	A	0	1	1	0	0	0	0	0	0	0	1	0	0	0
1	31595	GATGTTTTAA.AGCCCCACAA	A	G	0	0	0	0	0	0	0	0	0	0	0	1	1	1
1	31682	CGCGCTCTGG.TGTTAGTGCA	T	C	0	0	1	0	0	0	0	0	0	0	0	0	0	0
1	31709	CACCTGAATC.TGCCATGGTT	T	C	0	0	0	0	0	0	0	0	0	0	1	0	0	0
1	31775	AATATCGGGC.GGCAAAACGC	G	T	0	0	1	0	0	0	0	0	0	0	0	0	0	0
1	31784	CGGCAAAACG.CGCGACTCGC	C	T	0	0	0	0	0	0	0	0	0	0	0	0	0	1
1	31804	AATACCCGTA.AAGGGTCTTC	A	G	0	0	1	0	0	0	0	0	0	0	0	0	0	1
1	31832	CTTCTGAAAC.GTGGCGCAGA	G	A	0	0	0	0	0	0	0	0	0	0	1	0	0	0
1	31842	GTGGCGCAGA.ATTTTATTTT	A	G	0	0	1	0	0	0	0	0	0	0	0	0	0	0
1	31862	CTAAGTCGTT.TTGACCACCA	T	C	0	0	0	0	0	0	0	0	0	0	0	1	0	0
1	31865	AGTCGTTTTG.ACCACCATAT	A	G	0	1	0	0	0	0	0	0	0	0	1	1	1	1
1	31892	ATATTTTACC.ATCTTGATCC	A	G	0	0	1	0	0	0	0	0	0	0	0	0	1	1
1	31913	TTGCAATCGC.ATTAATGGTT	A	G	0	0	1	0	0	0	0	0	0	0	0	0	0	0
1	31928	TGGTTAAGTC.TCGACGAATT	T	A	0	0	0	0	0	0	0	0	0	0	0	1	0	0
1	31955	CTTCTAAACT.AACGGTTGTA	A	T	0	0	1	0	0	0	0	0	0	0	0	0	0	0
1	31997	GATATCCCTG.TCCAGACTTT	T	C	0	0	1	0	0	0	0	0	0	0	0	0	0	0
1	32027	GTGCAAGTGC.GTATTCTTCT	G	A	0	0	0	0	0	0	0	0	0	0	1	0	0	0
1	32036	CGTATTCTTC.TTTGGTTTCG	T	C	0	1	0	0	0	0	0	0	0	0	0	0	0	0
1	32111	TGTGTTCCGG.TGTTGCACCG	T	C	0	1	1	0	0	0	0	0	0	0	1	1	1	1
1	32322	TTTCAGCAAC.TGTTAAAGCA	T	A	0	1	1	0	0	0	0	0	0	0	1	1	0	0
1	32358	GGCGAGTCGT.CGCTGTCGGA	C	T	0	0	1	0	0	0	0	0	0	0	1	0	0	0
1	32400	CAGCACCTAG.CAAAATTGGA	C	T	0	1	0	0	0	0	0	0	0	0	0	1	0	0
1	32474	GCTGCATCTA.GGTTCGGCAT	G	A	0	1	0	0	0	0	0	0	0	0	0	0	0	0
1	32489	GGCATAATCA.ACAAGTTCGC	A	G	0	1	0	0	0	0	0	0	0	0	0	1	0	0
1	32574	CATGCATTTC.ACCTTCAACT	A	G	0	1	0	0	0	0	0	0	0	0	0	0	0	0
1	32646	GAGCGCTTGA.ATCTGTCTGG	A	G	0	1	0	0	0	0	0	0	0	0	0	1	0	1
1	32664	GGTCACTACC.AAAGCTTGAA	A	G	0	1	0	0	0	0	0	0	0	0	0	1	0	1
1	32667	CACTACCAAA.GCTTGAATGA	G	A	0	1	0	0	0	0	0	0	0	0	0	0	0	0
1	32685	GAGAAAGTAG.CGCTACACGT	C	T	0	0	0	0	0	0	0	0	0	0	0	0	1	0
1	32688	AAAGTAGCGC.TACACGTGGT	T	G	0	0	0	0	0	0	0	0	0	0	0	0	0	1
1	32691	GTAGCGCTAC.ACGTGGTGTA	A	G	0	1	0	0	0	0	0	0	0	0	0	1	1	1
1	32709	TAATACCAAA.GCGACGTACT	G	A	0	0	0	0	0	0	0	0	0	0	0	0	1	0
1	32763	GTTCAGCAGT.AGGATTAGTG	A	C	0	0	0	0	0	0	0	0	0	0	0	1	1	0
1	32784	TTACATAAGT.ATCAGCAATA	A	G	0	1	0	0	0	0	0	0	0	0	0	0	0	1
1	32859	CTTCTTTAAG.ACCAATTACA	A	G	0	0	1	0	0	0	0	0	0	0	1	0	0	0
1	32952	TAACTAGAAG.TGCAGCAATG	T	C	0	0	0	0	0	0	0	0	0	0	1	0	0	0
1	33024	TGCGTTGCAT.GGTTTGATAG	G	A	0	0	0	0	0	0	0	0	0	0	0	1	1	0
1	33054	AGAACTCTTC.GTATAACGGA	G	A	0	0	0	0	0	0	0	0	0	0	1	0	0	0
1	33060	CTTCGTATAA.CGGATTTTGT	C	T	0	0	0	0	0	0	0	0	0	0	0	1	0	0
1	33084	GATCTACAAT.CTCGATATTT	C	T	0	0	0	0	0	0	0	0	0	0	0	1	1	0
1	33087	CTACAATCTC.GATATTTACG	G	A	0	0	0	0	0	0	0	0	0	0	1	0	0	0
1	33129	ATTTTTTGAT.GTTTGCTTCA	G	A	0	0	0	0	0	0	0	0	0	0	1	0	0	0
1	33216	GTAATACGCG.CTCATCTTCA	C	T	0	0	0	0	0	0	0	0	0	0	1	0	0	0
1	33273	CTTGAGCAAA.GATTGGTTTC	G	A	0	1	1	0	0	0	0	0	0	0	1	0	0	1
1	33276	GAGCAAAGAT.TGGTTTCATC	T	C	0	1	1	0	0	0	0	0	0	0	1	0	0	1
1	33352	TTCGATAGGA.CGAGTTGCAA	C	T	0	0	0	0	0	0	1	0	0	0	0	0	0	0
1	33369	CAACACCTGA.GTCCATTGCA	G	A	0	1	1	0	0	0	0	0	0	0	1	0	0	1
1	33378	AGTCCATTGC.AGCTTTAGCA	A	T	0	1	1	0	0	0	0	0	0	0	1	0	0	1
1	33399	CAGCAGGCGC.GATTTCTAAA	G	A	0	1	1	0	0	0	0	0	0	0	1	0	0	1
1	33411	TTTCTAAAAT.CAAACGTTGA	C	T	0	0	0	0	0	0	0	0	0	0	1	0	0	1
1	33429	GATCAAGTGG.GCGTGGAATT	G	A	0	1	0	0	0	0	0	0	0	0	1	0	0	1
1	33450	AGTAGTCACG.ACCAAATGAA	A	G	0	0	1	0	0	0	0	0	0	0	1	0	0	1
1	33477	TTTCACCATA.AGTCGCTGCG	A	T	0	0	0	0	0	0	0	0	0	0	0	1	1	0
1	33480	CACCATAAGT.CGCTGCGTCA	C	A,T	0	1	1	0	0	0	0	0	0	0	1	2	2	1
1	33483	CATAAGTCGC.TGCGTCAGCT	T	A	0	0	0	0	0	0	0	0	0	0	0	1	1	0
1	33486	AAGTCGCTGC.GTCAGCTTCT	G	A	0	0	0	0	0	0	0	0	0	0	0	1	1	0
1	33498	CAGCTTCTAC.GTGAGCCATA	G	A	0	0	0	0	0	0	0	0	0	0	0	1	1	0
1	33519	GTGCAATTGC.ATGTACACAT	A	G	0	0	1	0	0	0	0	0	0	0	1	1	1	1
1	33552	CTTCGTTAAT.TGTTGTAGCA	T	G	0	0	0	0	0	0	0	0	0	0	0	1	1	0
1	33558	TAATTGTTGT.AGCACCTACG	A	C	0	0	0	0	0	0	0	0	0	0	0	1	1	0
1	33567	TAGCACCTAC.GTCAAGTGCA	G	A	0	0	0	0	0	0	0	0	0	0	1	0	0	0
1	33606	AACATAAAGC.ATTGTTTACT	A	G	0	0	0	0	0	0	0	0	0	0	0	1	1	0
1	33648	CAGTTGCCAT.GATTACATCT	G	A	0	0	0	0	0	0	0	0	0	0	0	1	1	0
1	33651	TTGCCATGAT.TACATCTGGA	T	G	0	0	0	0	0	0	0	0	0	0	0	1	1	0
1	33657	TGATTACATC.TGGACGTACT	T	A	0	0	0	0	0	0	0	0	0	0	0	1	1	0
1	33675	CTTCATGTGC.ATGTTCAGGC	A	G	0	0	0	0	0	0	0	0	0	0	0	1	1	0
1	33684	CATGTTCAGG.CAGAATTTCT	C	T	0	1	0	0	0	0	0	0	0	0	0	0	0	0
1	33699	TTTCTGGATC.CGGGTTTGCT	C	T	0	0	1	0	0	0	0	0	0	0	0	1	1	0
1	33708	CCGGGTTTGC.TAATGCAAAG	T	C	0	0	0	0	0	0	0	0	0	0	0	1	1	0
1	33711	GGTTTGCTAA.TGCAAAGATA	T	A	0	0	0	0	0	0	0	0	0	0	0	1	1	0
1	33717	CTAATGCAAA.GATAATCGGA	G	A	0	0	1	0	0	0	0	0	0	0	0	0	0	1
1	33723	CAAAGATAAT.CGGATTTTCA	C	T	0	0	0	0	0	0	0	0	0	0	0	1	1	0
1	33783	CTGAAAGACC.TAAGAACATA	T	C	0	0	0	0	0	0	0	0	0	0	0	1	1	0
1	33795	AGAACATATC.CGCGCCAGCC	C	T	0	0	0	0	0	0	0	0	0	0	0	1	1	0
1	33798	ACATATCCGC.GCCAGCCATT	G	A	0	0	0	0	0	0	0	0	0	0	0	1	1	0
1	33822	CATGTAATTG.AGTCGCTTTA	A	G,C	0	1	0	0	0	0	0	0	0	0	1	2	2	0
1	33855	AACGTTTTTT.CGATTCATCC	C	A	0	0	0	0	0	0	0	0	0	0	0	1	1	0
1	33864	TCGATTCATC.CAAGCCTTCA	C	T	0	1	0	0	0	0	0	0	0	0	0	0	0	0
1	33882	CACGTGAAGT.TGTAAGAAGA	T	C	0	0	0	0	0	0	0	0	0	0	1	0	0	0
1	33888	AAGTTGTAAG.AAGACCACGA	A	T	0	0	0	0	0	0	0	0	0	0	1	0	0	0
1	33915	CAACAATGAT.ATTTTCTTTA	A	G	0	0	0	0	0	0	0	0	0	0	0	0	0	1
1	33963	AACAAGAAAG.GGCAGCAGCA	G	A	0	0	0	0	0	0	0	0	0	0	0	1	1	0
1	34119	GAAGTTTCTT.CTCGATATAG	C	T	0	1	1	0	0	0	0	0	0	0	1	1	1	1
1	34122	GTTTCTTCTC.GATATAGAAA	G	A	0	1	1	0	0	0	0	0	0	0	1	0	0	1
1	34125	TCTTCTCGAT.ATAGAAACAT	A	G	0	1	1	0	0	0	0	0	0	0	1	0	0	1
1	34140	AACATTCAGG.TGCTTTGATA	T	C	0	1	1	0	0	0	0	0	0	0	1	0	0	1
1	34167	GGTTAATACC.GCCGAAAGTT	G	A	0	0	0	0	0	0	0	0	0	0	0	1	1	0
1	34353	CGTTACTGAC.AACAGCAACC	A	G	0	0	1	0	0	0	0	0	0	0	0	0	0	0
1	34619	AAAGGTTGGT.TATTTATCTG	T	A	0	1	0	0	0	0	0	0	0	0	1	1	1	1
1	34892	CACATTGCTG.CTTTTGTAGA	C	T	0	0	0	0	0	0	0	0	0	0	0	0	0	1
1	34934	CCACACCTTC.AGCAACTAGT	A	T	0	1	1	0	0	0	0	0	0	0	1	1	1	1
1	34943	CAGCAACTAG.TTTTAATCCC	T	C	0	1	1	0	0	0	0	0	0	0	0	1	1	1
1	34976	TCGCAATCAT.CGCATTCACA	C	T	0	0	0	0	0	0	0	0	0	0	1	0	0	0
1	35027	AAACAAAGGC.CCGGTCAATT	C	T	0	0	1	0	0	0	0	0	0	0	0	0	0	0
1	35132	GTTCTTTAAT.GGAGTGCAAT	G	C	0	0	0	0	0	0	0	0	0	0	1	0	0	0
1	35143	GAGTGCAATA.ATTTTTTTAC	A	G	0	1	1	0	0	0	0	0	0	0	0	1	1	1
1	35231	ATGTGTCTAA.AACTTCGTCT	A	G	0	0	0	0	0	0	0	0	0	0	0	0	1	0
1	35306	CTCGGACATC.GGCGTAGCCT	G	A	0	0	0	0	0	0	0	0	0	0	1	0	0	0
1	35309	GGACATCGGC.GTAGCCTGCT	G	A	0	1	1	0	0	0	0	0	0	0	1	1	0	1
1	35314	TCGGCGTAGC.CTGCTTTTTT	C	T	0	0	0	0	0	0	0	0	0	0	0	1	0	0
1	35315	CGGCGTAGCC.TGCTTTTTTC	T	A	0	1	1	0	0	0	0	0	0	0	1	1	1	1
1	35318	CGTAGCCTGC.TTTTTTCCAT	T	A	0	0	0	0	0	0	0	0	0	0	0	0	1	0
1	35342	GTAGCTGTTT.GCCAACTTTA	G	A	0	0	0	0	0	0	0	0	0	0	1	0	0	0
1	35360	TATCTAAAAC.GACTTTACCA	G	A	0	1	0	0	0	0	0	0	0	0	0	0	0	0
1	35369	CGACTTTACC.AATATCGGAA	A	T	0	0	0	0	0	0	0	0	0	0	0	1	0	0
1	35417	TGAACATATT.CGGCATAACT	C	A,T	0	2	2	0	0	0	0	0	0	0	1	2	2	0
1	35459	AGCGAATGAG.TGCTTCAAAA	T	G	0	1	0	0	0	0	0	0	0	0	0	0	0	0
1	35516	GGTAATACAC.CACAAATTCA	C	T	0	0	0	0	0	0	0	0	0	0	1	0	0	0
1	35570	AGTCTGCTGT.TTTATATGGG	T	C	0	1	0	0	0	0	0	0	0	0	1	0	0	1
1	35579	TTTTATATGG.GTTTGTAGTT	G	A	0	0	0	0	0	0	0	0	0	0	1	0	0	0
1	35597	TTTTATTACA.GTAATAGCTG	G	A	0	1	1	0	0	0	0	0	0	0	1	0	1	1
1	35606	AGTAATAGCT.GATAGTATTG	G	A	0	1	1	0	0	0	0	0	0	0	1	1	1	1
1	35612	AGCTGATAGT.ATTGCCACCT	A	G	0	1	1	0	0	0	0	0	0	0	1	1	0	1
1	35621	TATTGCCACC.TAAACGTTTT	T	C	0	0	0	0	0	0	0	0	0	0	0	0	1	0
1	35626	CCACCTAAAC.GTTTTGCTTC	G	T	0	0	0	0	0	0	0	0	0	0	0	0	0	1
1	35639	TTGCTTCCGA.CAACGCTTGT	C	T	0	0	0	0	0	0	0	0	0	0	0	1	0	0
1	35642	CTTCCGACAA.CGCTTGTTCG	C	G	0	1	0	0	0	0	0	0	0	0	1	1	0	1
1	35678	GATCAATTTG.CCGGCCATGC	C	T	0	1	1	0	0	0	0	0	0	0	1	1	0	1
1	35702	GGAAACAAGC.AACCCCAATA	A	G	0	0	1	0	0	0	0	0	0	0	1	1	0	1
1	35705	AACAAGCAAC.CCCAATAGAA	C	T	0	0	1	0	0	0	0	0	0	0	0	0	0	0
1	35756	AAAAAGGCGC.ATTTAAAGCT	A	G	0	0	0	0	0	0	0	0	0	0	1	0	0	0
1	35840	CAAAATCATC.GCCGTTTAAG	G	A	0	1	0	0	0	0	0	0	0	0	1	0	0	0
1	35882	TATTGGTCAG.TCGTAGTCGC	T	C	0	0	0	0	0	0	0	0	0	0	0	1	0	0
1	35939	TATTTAGAAA.CTCATTAAAT	C	T	0	0	1	0	0	0	0	0	0	0	0	0	0	0
1	35951	CATTAAATGC.TCTAAATCTA	T	C	0	0	0	0	0	0	0	0	0	0	0	1	0	0
1	35986	ATTAAAGCCA.GATTTTTAAA	G	A	0	1	0	0	0	0	0	0	0	0	1	1	1	1
1	36020	TAACAAGATA.TTGATGTAAT	T	C	0	0	0	0	0	0	0	0	0	0	0	1	0	0
1	36056	AGCGGTTAGG.GAGGTGAGTC	G	A,T	0	1	1	0	0	0	0	0	0	0	1	2	0	1
1	36077	AACTATCATA.GTTTTTTAAA	G	A	0	0	0	0	0	0	0	0	0	0	0	1	0	0
1	36107	GCTGCTCTTG.TCGCTTTTGG	T	C	0	0	0	0	0	0	0	0	0	0	1	0	0	0
1	36155	AATTAATAAT.CTGGTTGTAC	C	T	0	0	0	0	0	0	0	0	0	0	0	0	1	0
1	36158	TAATAATCTG.GTTGTACTCA	G	A	0	0	0	0	0	0	0	0	0	0	0	0	1	0
1	36212	CACTTTTACC.CGATGTAAAC	C	A	0	0	0	0	0	0	0	0	0	0	1	0	0	0
1	36266	TTAGAAGTTG.TTGAGTAATG	T	C	0	0	0	0	0	0	0	0	0	0	0	0	1	0
1	36335	ATAGCTGCTG.ACTTAATAAT	A	G	0	0	1	0	0	0	0	0	0	0	0	0	0	0
1	36437	CTTCAGCTGC.CTGCTCAAGC	C	T	0	0	1	0	0	0	0	0	0	0	1	0	0	0
1	36512	TGGTCATTCC.GACCATACGT	G	A	0	1	1	0	0	0	0	0	0	0	1	0	1	1
1	36584	TCCAACGCCA.AGAACCATTA	A	C	0	1	0	0	0	0	0	0	0	0	0	1	0	1
1	36601	TTACGACGTA.AAATGCGGAA	A	G	0	1	0	0	0	0	0	0	0	0	0	1	0	1
1	36605	GACGTAAAAT.GCGGAAGGTA	G	A	0	1	0	0	0	0	0	0	0	0	0	1	0	1
1	36611	AAATGCGGAA.GGTAATATTG	G	A	0	0	1	0	0	0	0	0	0	0	1	0	0	0
1	36632	AGTGATCAGA.TTTTCCTTCC	T	C	0	0	1	0	0	0	0	0	0	0	1	0	0	0
1	36647	CTTCCAAGTG.TTCTTTTAAA	T	C	0	0	1	0	0	0	0	0	0	0	0	0	0	0
1	36794	CCCAATCCCA.CGGTCGGATA	C	T	0	0	0	0	0	0	0	0	0	0	0	1	0	0
1	36889	GTCCTTTCCC.GAACCTTTTG	G	T	0	0	0	0	0	0	0	0	0	0	1	0	0	0
1	36893	TTTCCCGAAC.CTTTTGTTCG	C	T	0	1	0	0	0	0	0	0	0	0	0	0	0	0
1	37088	AAGCACAAAG.CAAAGTTGCG	C	T	0	1	0	0	0	0	0	0	0	0	0	1	1	1
1	37115	CTAAATTATA.AGCAAAGTAA	A	T	0	1	0	0	0	0	0	0	0	0	0	1	1	1
1	37175	TAATGAGTGG.GACTGTACTT	G	A	0	1	0	0	0	0	0	0	0	0	1	1	1	1
1	37221	AGGTTGTTGA.GTTAAAAATG	G	T	0	0	0	0	0	0	0	0	0	0	0	1	0	0
1	37241	TAAGACCAAT.AATGTGGGCT	A	T	0	1	0	0	0	0	0	0	0	0	1	1	1	1
1	37271	ATAATGCTAT.GAGGATATGA	G	C	0	0	1	0	0	0	0	0	0	0	0	0	0	0
1	37322	GGGAAAAATG.CAGAACAATG	C	T	0	0	0	0	0	0	0	0	0	0	1	0	0	0
1	37328	AATGCAGAAC.AATGATATTA	A	C	0	0	0	0	0	0	0	0	0	0	0	0	1	0
1	37337	CAATGATATT.AATTCCCATT	A	T	0	1	1	0	0	0	0	0	0	0	1	1	1	1
1	37358	AAATTCCAGA.CGTCAAACAA	C	T	0	0	1	0	0	0	0	0	0	0	0	0	0	0
1	37359	AATTCCAGAC.GTCAAACAAA	G	A	0	0	1	0	0	0	0	0	0	0	0	0	0	0
1	37360	ATTCCAGACG.TCAAACAAAT	T	C	0	1	1	0	0	0	0	0	0	0	1	1	1	1
1	37370	TCAAACAAAT.GCCTTGTAGC	G	A	0	0	1	0	0	0	0	0	0	0	0	0	0	0
1	37381	CCTTGTAGCA.TTAAATCGGT	T	C	0	1	0	0	0	0	0	0	0	0	1	1	1	1
1	37388	GCATTAAATC.GGTTTTCTTA	G	T	0	1	0	0	0	0	0	0	0	0	1	1	1	1
1	37451	ATAATAGACA.GGTAAGCGTT	G	A	0	0	0	0	0	0	0	0	0	0	1	1	1	1
1	37460	AGGTAAGCGT.TAAAATAGTA	T	C	0	0	0	0	0	0	0	0	0	0	1	1	1	1
1	37732	AATATTCATA.TCGTAAAAGT	T	C	0	1	0	0	0	0	0	0	0	0	0	1	1	1
1	37736	TTCATATCGT.AAAAGTAAGT	A	G	0	0	0	0	0	0	0	0	0	0	0	0	1	0
1	37851	GTACGTAATA.CACGGTCCCC	C	T	0	1	0	0	0	0	0	0	0	0	0	0	0	0
1	37909	TAATTTCATT.TTCACTTAAA	T	G	0	0	0	0	0	0	0	0	0	0	0	1	1	1
1	37927	AACCACCCTC.GGGACCAATT	G	A	0	1	0	0	0	0	0	0	0	0	0	1	1	1
1	37981	CATCTTTTTG.TTCTTTTTCA	T	C	0	1	0	0	0	0	0	0	0	0	0	0	0	1
1	37996	TTTCAGGAGC.CAAAACAAAT	C	T	0	0	0	0	0	0	0	0	0	0	0	1	1	0
1	38012	AAATTTAGAT.GTAGGAAGGT	G	A	0	1	0	0	0	0	0	0	0	0	1	1	1	1
1	38013	AATTTAGATG.TAGGAAGGTC	T	C	0	1	0	0	0	0	0	0	0	0	1	1	1	1
1	38023	TAGGAAGGTC.GGATGAGTTT	G	A	0	1	0	0	0	0	0	0	0	0	0	1	1	1
1	38049	TCATGAAGAG.AAATAGGTGC	A	C	0	1	1	0	0	0	0	0	0	0	1	0	0	1
1	38061	ATAGGTGCTA.AAACTTCTGG	A	G	0	1	0	0	0	0	0	0	0	0	0	0	0	1
1	38109	GCTGCAATTG.CAACAGCTTG	C	T	0	0	0	0	0	0	0	0	0	0	0	0	1	0
1	38130	CAATGATCTA.ACTTTTTTTG	A	G	0	0	0	0	0	0	0	0	0	0	0	0	1	0
1	38131	AATGATCTAA.CTTTTTTTGA	C	T	0	1	0	0	0	0	0	0	0	0	0	1	1	1
1	38167	AACGCATTTC.GCAACGTTCA	G	A	0	0	0	0	0	0	0	0	0	0	0	1	0	0
1	38179	AACGTTCACT.GGTCAAGAGC	G	A	0	0	1	0	0	0	0	0	0	0	1	0	0	0
1	38203	TCTTACTGAC.ACCAAGTTCA	A	G	0	1	1	0	0	0	0	0	0	0	1	1	1	1
1	38271	TGACCAAGAA.TGGCTTTAAA	T	G	0	1	0	0	0	0	0	0	0	0	0	1	1	1
1	38284	CTTTAAATGG.AGCATTACGG	A	G	0	0	1	0	0	0	0	0	0	0	1	1	1	0
1	38317	AATTCTCAAT.AGTGACAAAC	A	G	0	0	1	0	0	0	0	0	0	0	1	0	1	0
1	38357	GGTCAATGTC.ACGAGATACT	A	G	0	1	1	0	0	0	0	0	0	0	1	1	1	1
1	38377	CACCACCTTG.CCCATTAAAT	C	G	0	0	1	0	0	0	0	0	0	0	1	0	1	0
1	38390	ATTAAATAGT.GTAGCTTGTT	G	A	0	0	1	0	0	0	0	0	0	0	1	0	1	0
1	38392	TAAATAGTGT.AGCTTGTTCT	A	G	0	1	1	0	0	0	0	0	0	0	1	1	1	1
1	38413	GTAATTGTGC.GCGTAAAACA	G	A	0	0	0	0	0	0	0	0	0	0	0	0	1	0
1	38584	TCATTGAGTA.AAAGTGTAAG	A	G	0	1	1	0	0	0	0	0	0	0	1	1	1	1
1	38671	TACTTTCACT.GTCATCGCCA	G	A	0	0	0	0	0	0	0	0	0	0	0	0	1	0
1	38722	GAATTTCAGC.ACCAGTACCA	A	T	0	0	0	0	0	0	0	0	0	0	1	0	0	0
1	38785	TACCAGGAGC.GACTGGAATG	G	A	0	1	0	0	0	0	0	0	0	0	0	0	0	0
1	38802	ATGTTAATTC.CAGCTTTTTC	C	T	0	0	0	0	0	0	0	0	0	0	0	0	1	0
1	38809	TTCCAGCTTT.TTCCAAACGC	T	A	0	1	0	0	0	0	0	0	0	0	1	0	0	0
1	38920	TATCTGAGTC.AAGGCTTTCG	A	G	0	0	1	0	0	0	0	0	0	0	0	0	1	0
1	38974	CAATATGAAA.ATGATCACCT	A	G	0	0	1	0	0	0	0	0	0	0	1	1	1	1
1	38977	TATGAAAATG.ATCACCTGAG	A	G	0	0	1	0	0	0	0	0	0	0	1	1	1	1
1	38980	GAAAATGATC.ACCTGAGTGC	A	G	0	0	1	0	0	0	0	0	0	0	1	1	1	1
1	39058	CAGATGGTAA.ATCACCACGT	A	G	0	1	1	0	0	0	0	0	0	0	1	1	1	1
1	39061	ATGGTAAATC.ACCACGTAAA	A	G	0	1	1	0	0	0	0	0	0	0	1	1	1	1
1	39244	CATAAGTAAT.TGAGAAAAAC	T	C	0	0	1	0	0	0	0	0	0	0	1	0	1	1
1	39407	AAAGGGCAGT.CGGTTCACCG	C	T	0	0	1	0	0	0	0	0	0	0	0	0	0	0
1	39421	TCACCGTCTG.CCCTTAAGTT	C	A	0	0	0	0	0	0	0	0	0	0	0	0	1	0
1	39427	TCTGCCCTTA.AGTTCTTAGT	A	T	0	0	0	0	0	0	0	0	0	0	0	0	1	1
1	39476	TCAACAGCAA.CGCCTAAATA	C	T	0	0	1	0	0	0	0	0	0	0	0	0	0	0
1	39513	TTAACTGAGT.AAGTACACCA	A	G	0	0	0	0	0	0	0	0	0	0	0	0	1	0
1	39552	CAGCAGCAAC.CTCTTCGTCA	C	T	0	0	0	0	0	0	0	0	0	0	1	1	1	1
1	39600	TTTTTGCAGC.TTTTTCACTT	T	C	0	0	0	0	0	0	0	0	0	0	0	0	1	0
1	39618	TTGCAGGTAG.GTCGGCAAAT	G	A	0	0	1	0	0	0	0	0	0	0	0	0	1	0
1	39634	AAATTTCTCT.TGGAATAAGT	T	C	0	0	0	0	0	0	0	0	0	0	0	1	0	0
1	39750	GAAGGATAAG.ATAGTTGTTT	A	G	0	1	0	0	0	0	0	0	0	0	1	1	0	1
1	39753	GGATAAGATA.GTTGTTTTCG	G	A	0	1	0	0	0	0	0	0	0	0	1	1	0	1
1	39755	ATAAGATAGT.TGTTTTCGTC	T	C	0	1	0	0	0	0	0	0	0	0	1	1	0	1
1	39777	CTGAACGATA.AACTTGGTGA	A	C	0	0	0	0	0	0	0	0	0	0	1	0	0	0
1	39837	AAGCCGTGTC.GATTTCTGTA	G	A	0	0	0	0	0	0	0	0	0	0	0	0	0	1
1	39900	TGTCTAACAT.CGCTGCATCA	C	T	0	1	0	0	0	0	0	0	0	0	1	1	1	1
1	39915	CATCACACAC.ATGGTAGTTA	A	G	0	1	0	0	0	0	0	0	0	0	1	1	0	1
1	39918	CACACACATG.GTAGTTACCA	G	A	0	0	0	0	0	0	0	0	0	0	0	1	0	0
1	39927	GGTAGTTACC.AGTTGTTGTT	A	G	0	0	0	0	0	0	0	0	0	0	0	0	1	0
1	39941	GTTGTTACAA.TAAGGTCAGT	T	C	0	1	1	0	0	0	0	0	0	0	1	1	1	1
1	39975	CGTGGTTAAT.ATCTTCTTTT	A	G	0	0	1	0	0	0	0	0	0	0	0	0	0	0
1	40089	GAACGATCAT.GCCTTCTTGA	G	A	0	1	0	0	0	0	0	0	0	0	1	1	1	0
1	40098	TGCCTTCTTG.ACGTAAAGAT	A	G	0	0	1	0	0	0	0	0	0	0	0	0	0	0
1	40128	CTTTACCTAC.ATCACCGTAA	A	G	0	1	1	0	0	0	0	0	0	0	1	1	1	1
1	40182	TATCTGTTGC.ACGTTTGATT	A	G	0	0	1	0	0	0	0	0	0	0	0	0	0	0
1	40227	CATATTTGTT.GTCGTTTTTA	G	A	0	0	0	0	0	0	0	0	0	0	0	0	0	1
1	40230	ATTTGTTGTC.GTTTTTAGAC	G	A	0	0	1	0	0	0	0	0	0	0	0	0	0	1
1	40239	CGTTTTTAGA.CTTAGTAACA	C	T	0	1	1	0	0	0	0	0	0	0	0	0	1	1
1	40251	TAGTAACAGA.GTCATTTACG	G	A	0	0	1	0	0	0	0	0	0	0	0	0	0	1
1	40269	CGTTGATTGC.CGGTACTTTT	C	A	0	1	1	0	0	0	0	0	0	0	0	0	1	1
1	40326	CACCTGTTGT.GGTTTCTTCG	G	A	0	0	1	0	0	0	0	0	0	0	1	0	0	1
1	40350	TACCGTGAAT.GCGCTCTAAA	G	A	0	0	1	0	0	0	0	0	0	0	0	0	0	0
1	40353	CGTGAATGCG.CTCTAAAAGT	C	T	0	0	1	0	0	0	0	0	0	0	0	0	0	0
1	40362	GCTCTAAAAG.TGCAGGATAT	T	A	0	0	0	0	0	0	0	0	0	0	1	1	0	1
1	40434	CATCCCAAGG.TTGGCCATTT	T	C	0	0	0	0	0	0	0	0	0	0	0	0	0	1
1	40449	CATTTACATT.AATTTGTTGT	A	G	0	1	1	0	0	0	0	0	0	0	0	1	1	1
1	40464	GTTGTTCAAG.GCACCATACG	G	A	0	1	1	0	0	0	0	0	0	0	0	1	1	0
1	40473	GGCACCATAC.GTATTCTTCT	G	A	0	1	1	0	0	0	0	0	0	0	0	1	1	1
1	40578	AAGATGTCCA.GCGAACTTCA	G	A	0	1	1	0	0	0	0	0	0	0	0	0	1	1
1	40632	CTGTTTGAAT.GGTCATGTGG	G	A	0	1	0	0	0	0	0	0	0	0	0	0	0	0
1	40680	GTGGTTTAGA.CGCTGCATAA	C	A	0	0	0	0	0	0	0	0	0	0	0	0	1	0
1	40689	ACGCTGCATA.ACGTTTACGT	A	G	0	1	0	0	0	0	0	0	0	0	0	0	1	1
1	40709	AAGCCGATCA.AAGCTGGCAT	A	G	0	0	1	0	0	0	0	0	0	0	0	0	0	0
1	40749	TTTCTTTACG.ACCGTAGTCA	A	G	0	0	0	0	0	0	0	0	0	0	0	0	1	0
1	40956	TCGACTAGCG.AAACATTGTA	A	G	0	0	0	0	0	0	0	0	0	0	0	0	1	0
1	41044	TTATGGCCTT.AAATATTCCC	A	G	0	0	0	0	0	0	0	0	0	0	0	0	1	0
1	41067	TCTTTGGCAA.ACCTCGAAGC	A	C	0	1	0	0	0	0	0	0	0	0	0	0	0	0
1	41080	TCGAAGCGAA.CTGTGGCCTT	C	T	0	0	0	0	0	0	0	0	0	0	0	0	0	1
1	41095	GCCTTTTTGC.AGTTTGGATG	A	T,G	0	0	0	0	0	0	0	0	0	0	1	0	0	2
1	41122	AACATCATGG.AGTACAAATT	A	G	0	0	0	0	0	0	0	0	0	0	1	0	0	0
1	41125	ATCATGGAGT.ACAAATTGAT	A	G	0	0	0	0	0	0	0	0	0	0	0	1	0	1
1	41127	CATGGAGTAC.AAATTGATGT	A	C	0	0	1	0	0	0	0	0	0	0	0	0	0	0
1	41146	TTGCTGAGCT.GATTAAAGTT	G	A	0	1	0	0	0	0	0	0	0	0	0	1	1	0
1	41161	AAGTTTGCCG.CTATGACGAT	C	T	0	1	0	0	0	0	0	0	0	0	1	1	1	0
1	41168	CCGCTATGAC.GATGAAGGAA	G	A	0	0	0	0	0	0	0	0	0	0	0	0	0	1
1	41234	GGTGTCATTT.CACTCAGATC	C	T	0	0	0	0	0	0	0	0	0	0	0	1	0	0
1	41254	ATGATCCTAA.CATTAGCCCA	C	T	0	0	0	0	0	0	0	0	0	0	0	0	1	0
1	41261	TAACATTAGC.CCAAGCGAAC	C	T	0	1	0	0	0	0	0	0	0	0	1	1	0	0
1	41294	AGAAGCAAAG.ATATTAAAAA	A	G	0	1	1	0	0	0	0	0	0	0	1	0	1	1
1	41301	AAGATATTAA.AAATACCAAC	A	G	0	1	1	0	0	0	0	0	0	0	1	0	1	1
1	41350	AAACAGAGAC.TCAAAATGGA	T	G	0	1	1	0	0	0	0	0	0	0	1	1	1	1
1	41398	TAGAAGGGGT.AGGGAATCAG	A	G	0	0	0	0	0	0	0	0	0	0	0	1	0	0
1	41410	GGAATCAGTC.GCTCATTTAT	G	A	0	0	0	0	0	0	0	0	0	0	1	0	1	0
1	41519	TTGCCGTCAG.GCTGTCGTAA	G	A	0	1	0	0	0	0	0	0	0	0	0	0	0	0
1	41527	AGGCTGTCGT.AATTGGTGAC	A	G	0	1	0	0	0	0	0	0	0	0	1	1	1	1
1	41536	TAATTGGTGA.CCGTAATTTA	C	T	0	1	0	0	0	0	0	0	0	0	1	1	1	0
1	41566	CGACTAAATT.GAATTAAACT	G	A	0	0	1	0	0	0	0	0	0	0	0	0	0	0
1	41574	TTGAATTAAA.CTTAAATGAG	C	T	0	0	0	0	0	0	0	0	0	0	0	1	1	0
1	41619	AGTTATTGTT.GTTGATATTC	G	T	0	0	0	0	0	0	0	0	0	0	0	0	0	1
1	41630	TTGATATTCT.TGAATGACTT	T	G	0	0	0	0	0	0	0	0	0	0	0	0	1	0
1	41677	TAGCAGGGGC.ACCGCAATAT	A	G	0	0	0	0	0	0	0	0	0	0	0	0	0	1
1	41758	CACGAACATG.ACCCTTGAGT	A	G	0	0	1	0	0	0	0	0	0	0	1	1	1	1
1	41782	TTGGTGATTT.GAGTGCAGTT	G	A	0	0	0	0	0	0	0	0	0	0	0	0	1	0
1	41806	TTGCCAAAGT.GATTAATGAG	G	A	0	1	1	0	0	0	0	0	0	0	1	1	1	1
1	41815	TGATTAATGA.GCGATATTTA	G	A	0	0	1	0	0	0	0	0	0	0	0	0	0	0
1	41959	CTTCTGTGCG.TACTTTTAAT	T	A	0	0	0	0	0	0	0	0	0	0	1	1	1	0
1	42058	ATTAATGCGA.ATCAAAAATG	A	T	0	0	1	0	0	0	0	0	0	0	1	1	1	0
1	42087	GTGAATTAGT.GGAGGCATCA	G	A	0	0	1	0	0	0	0	0	0	0	0	0	0	0
1	42103	ATCAGTCACA.CTATTTGATG	C	T	0	0	0	0	0	0	0	0	0	0	0	0	1	0
1	42120	ATGAGGATTT.GATAAAGGCA	G	A	0	0	0	0	0	0	0	0	0	0	0	0	0	1
1	42128	TTGATAAAGG.CAGGACTTTA	C	T	0	0	1	0	0	0	0	0	0	0	1	1	1	0
1	42132	TAAAGGCAGG.ACTTTATTTA	A	T	0	0	1	0	0	0	0	0	0	0	1	1	1	1
1	42142	ACTTTATTTA.GCTTTTCATC	G	A	0	0	1	0	0	0	0	0	0	0	0	0	0	0
1	42173	TAAGCATGCT.ATCGAATCGA	A	G	0	0	0	0	0	0	0	0	0	0	0	0	1	0
1	42176	GCATGCTATC.GAATCGAATT	G	A	0	0	0	0	0	0	0	0	0	0	0	0	1	0
1	42194	TTGCGTTGTA.CTGCAATAAT	C	T	0	0	0	0	0	0	0	0	0	0	0	1	1	0
1	42200	TGTACTGCAA.TAATTGTTGA	T	C	0	0	0	0	0	0	0	0	0	0	0	1	1	0
1	42248	TTATCGCTTG.AGCAATATTC	A	T,C	0	2	2	0	0	0	0	0	0	0	0	0	1	0
1	42262	ATATTCTCTT.CAAAAGTAAG	C	T	0	1	0	0	0	0	0	0	0	0	0	0	0	0
1	42281	GACCCGTAAA.CTTGCCTTTG	C	T	0	0	0	0	0	0	0	0	0	0	1	1	0	0
1	42323	CCCAAAGCGG.TTCAATGGTT	T	C	0	0	0	0	0	0	0	0	0	0	1	1	0	0
1	42330	CGGTTCAATG.GTTCTTAACA	G	A	0	0	0	0	0	0	0	0	0	0	0	0	1	0
1	42347	ACATTTGGAA.CGTGTGCTCT	C	T	0	0	0	0	0	0	0	0	0	0	1	1	0	0
1	42382	TCATTAGGTT.CAGTTGAATA	C	T	0	0	0	0	0	0	0	0	0	0	0	0	1	0
1	42451	AGTTCAGCAA.CTTGTTGTTT	C	T	0	0	0	0	0	0	0	0	0	0	0	0	0	1
1	42458	CAACTTGTTG.TTTTAACTCA	T	C	0	0	0	0	0	0	0	0	0	0	1	0	0	0
1	42496	ACACGACCTA.ACGGGAAGCA	A	G	0	0	0	0	0	0	0	0	0	0	1	1	1	0
1	42503	CTAACGGGAA.GCATATCCAT	G	A	0	0	0	0	0	0	0	0	0	0	1	1	0	0
1	42515	ATATCCATTT.GACAAATGCT	G	T	0	0	0	0	0	0	0	0	0	0	0	0	1	0
1	42542	GCTTGGCTGG.GAAGTTGTCA	G	A	0	0	1	0	0	0	0	0	0	0	0	0	0	0
1	42557	TGTCAAATAG.TCCCCAAAAT	T	C	0	0	0	0	0	0	0	0	0	0	1	1	1	1
1	42584	GAATATTCAA.GAATGCTTTT	G	A	0	1	0	0	0	0	0	0	0	0	0	0	0	0
1	42588	ATTCAAGAAT.GCTTTTTGCA	G	A	0	0	0	0	0	0	0	0	0	0	1	0	0	0
1	42608	GTGCTAGTTT.GGCATGAAGT	G	T	0	0	0	0	0	0	0	0	0	0	0	1	1	1
1	42614	GTTTGGCATG.AAGTTGTTCA	A	C	0	0	0	0	0	0	0	0	0	0	0	1	1	1
1	42616	TTGGCATGAA.GTTGTTCAGC	G	A	0	0	0	0	0	0	0	0	0	0	0	1	1	1
1	42651	AGCCTCATAA.TATTTTAAAA	T	A	0	0	0	0	0	0	0	0	0	0	1	1	1	1
1	42662	ATTTTAAAAT.TGCAGTGGCA	T	C	0	0	0	0	0	0	0	0	0	0	1	1	1	1
1	42665	TTAAAATTGC.AGTGGCAATA	A	T	0	0	0	0	0	0	0	0	0	0	1	1	1	1
1	42680	CAATAAACAA.GTGCGCGTGA	G	A	0	0	0	0	0	0	0	0	0	0	1	0	0	0
1	42683	TAAACAAGTG.CGCGTGAATA	C	T	0	0	1	0	0	0	0	0	0	0	1	0	0	0
1	42686	ACAAGTGCGC.GTGAATATCT	G	A	0	0	1	0	0	0	0	0	0	0	1	0	0	0
1	42688	AAGTGCGCGT.GAATATCTGC	G	T	0	0	1	0	0	0	0	0	0	0	0	0	0	0
1	42698	GAATATCTGC.CAAGCGGCCT	C	T	0	0	1	0	0	0	0	0	0	0	0	0	0	0
1	42701	TATCTGCCAA.GCGGCCTGAT	G	A	0	0	1	0	0	0	0	0	0	0	0	0	0	0
1	42713	GGCCTGATAG.CATTTCTTTA	C	T	0	0	0	0	0	0	0	0	0	0	0	1	0	0
1	42731	TACGCTTTAG.GTCTCCTGCG	G	A	0	0	0	0	0	0	0	0	0	0	0	0	0	1
1	42737	TTAGGTCTCC.TGCGAGTAAT	T	G	0	0	0	0	0	0	0	0	0	0	1	0	0	0
1	42746	CTGCGAGTAA.TCCTAGTGCC	T	G	0	1	1	0	0	0	0	0	0	0	1	1	1	0
1	42749	CGAGTAATCC.TAGTGCCATA	T	A	0	1	1	0	0	0	0	0	0	0	1	1	1	0
1	42752	GTAATCCTAG.TGCCATATCG	T	C	0	0	0	0	0	0	0	0	0	0	0	0	0	1
1	42809	TTTTATAGTA.GCTTGCAGTG	G	A	0	1	1	0	0	0	0	0	0	0	1	1	1	1
1	42818	AGCTTGCAGT.GAATTGATCT	G	A	0	0	0	0	0	0	0	0	0	0	1	0	0	0
1	42833	GATCTGCTGA.CTGAGGCGCA	C	T	0	1	1	0	0	0	0	0	0	0	1	1	0	0
1	42839	CTGACTGAGG.CGCATCACTC	C	T	0	1	1	0	0	0	0	0	0	0	1	1	1	0
1	42844	TGAGGCGCAT.CACTCGAACC	C	A	0	0	0	0	0	0	0	0	0	0	0	0	1	0
1	42848	GCGCATCACT.CGAACCACCT	C	T	0	0	1	0	0	0	0	0	0	0	1	0	0	0
1	42854	CACTCGAACC.ACCTGTCCAA	A	T	0	1	0	0	0	0	0	0	0	0	0	0	0	0
1	42857	TCGAACCACC.TGTCCAACCA	T	C	0	1	1	0	0	0	0	0	0	0	1	1	1	1
1	42881	CAAATGATCT.TGCACCGCGG	T	A	0	1	1	0	0	0	0	0	0	0	0	1	1	1
1	42953	CATTGGCTTT.GTCGTCAGAC	G	A	0	0	0	0	0	0	0	0	0	0	0	0	0	1
1	42956	TGGCTTTGTC.GTCAGACTGA	G	A	0	0	0	0	0	0	0	0	0	0	1	1	0	0
1	42995	AAAGATAAGG.GTGACAGCGC	G	A	0	0	1	0	0	0	0	0	0	0	0	0	0	1
1	43001	AAGGGTGACA.GCGCATTGAG	G	A	0	0	1	0	0	0	0	0	0	0	0	0	0	1
1	43031	AAATCATCAA.TGAGCGGGTT	T	C	0	1	1	0	0	0	0	0	0	0	0	0	1	1
1	43034	TCATCAATGA.GCGGGTTAAA	G	A	0	0	0	0	0	0	0	0	0	0	0	1	0	0
1	43046	GGGTTAAAAT.ATTTGCACCT	A	G	0	0	1	0	0	0	0	0	0	0	0	0	0	1
1	43052	AAATATTTGC.ACCTTCTACT	A	G	0	0	0	0	0	0	0	0	0	0	0	1	1	0
1	43061	CACCTTCTAC.TGTAATAGCA	T	C	0	0	1	0	0	0	0	0	0	0	0	1	1	1
1	43067	CTACTGTAAT.AGCAATTGGA	A	G	0	0	1	0	0	0	0	0	0	0	0	0	0	1
1	43079	CAATTGGAAT.CGCTTGATAG	C	T	0	0	0	0	0	0	0	0	0	0	0	0	1	0
1	43091	CTTGATAGGT.GAGAGCAAGG	G	A	0	0	1	0	0	0	0	0	0	0	0	0	0	0
1	43094	GATAGGTGAG.AGCAAGGAAA	A	G	0	0	1	0	0	0	0	0	0	0	0	0	0	0
1	43112	AATTGCGTGG.CCCAAGTTGA	C	T	0	0	0	0	0	0	0	0	0	0	0	0	1	1
1	43127	GTTGAATTGC.ACGTCCTCCA	A	G	0	0	1	0	0	0	0	0	0	0	0	0	0	0
1	43148	CAATATCCAT.TCCGTGATTA	T	C	0	1	0	0	0	0	0	0	0	0	0	0	0	0
1	43172	CTTTACGCAT.CGTTTCAGTT	C	G,T	0	0	2	0	0	0	0	0	0	0	0	0	1	0
1	43178	GCATCGTTTC.AGTTGCATAG	A	G	0	0	1	0	0	0	0	0	0	0	0	0	1	0
1	43217	TTACAGCAGG.GGTTCCACCT	G	A	0	0	0	0	0	0	0	0	0	0	0	0	1	0
1	43256	CTAAATAACG.GAATGCTTCA	G	A	0	0	1	0	0	0	0	0	0	0	0	0	1	1
1	43298	TTTCACTGCT.TGCTTCTTGT	T	A	0	0	1	0	0	0	0	0	0	0	0	0	1	0
1	43337	CAGAAATATT.GAACTGTTGA	G	A	0	0	0	0	0	0	0	0	0	0	0	1	0	1
1	43340	AAATATTGAA.CTGTTGACGA	C	T	0	0	0	0	0	0	0	0	0	0	0	1	0	1
1	43343	TATTGAACTG.TTGACGAATT	T	C	0	0	0	0	0	0	0	0	0	0	0	1	0	1
1	43346	TGAACTGTTG.ACGAATTCTT	A	G	0	0	0	0	0	0	0	0	0	0	0	1	0	1
1	43361	TTCTTGCAAA.AGCACCGACA	A	T	0	1	0	0	0	0	0	0	0	0	1	1	0	1
1	43369	AAAGCACCGA.CAGTGAGATA	C	T	0	0	0	0	0	0	0	0	0	0	0	0	1	0
1	43397	CACCTGCGGC.CGTGGCTAAT	C	T	0	1	0	0	0	0	0	0	0	0	1	0	0	0
1	43403	CGGCCGTGGC.TAATGCGGGC	T	C	0	0	0	0	0	0	0	0	0	0	0	0	1	0
1	43409	TGGCTAATGC.GGGCAGTGAA	G	T	0	0	0	0	0	0	0	0	0	0	0	0	1	0
1	43424	GTGAAATACC.TCGGCCAACA	T	A	0	0	0	0	0	0	0	0	0	0	1	0	0	0
1	43438	CCAACACCTA.AGCATTCCAT	A	G	0	1	0	0	0	0	0	0	0	0	1	0	0	0
1	43454	CCATCAGCAT.GCGCCAGCCT	G	A	0	0	0	0	0	0	0	0	0	0	0	0	1	0
1	43469	AGCCTTTACC.AGCATTTTCT	A	G	0	1	0	0	0	0	0	0	0	0	0	1	0	1
1	43523	CATCTTCACC.CTCTACTGTC	C	T	0	0	0	0	0	0	0	0	0	0	0	1	0	1
1	43553	ATGGAGAGCC.CGGATAGTGT	C	T	0	0	1	0	0	0	0	0	0	0	1	0	1	0
1	43559	AGCCCGGATA.GTGTCGTGCA	G	A	0	1	0	0	0	0	0	0	0	0	1	1	0	1
1	43607	GAATTAAAGC.ACAGGTAATC	A	G	0	0	0	0	0	0	0	0	0	0	0	0	0	1
1	43626	CCCGTACTCA.GTTTTAGTCT	G	T	0	0	0	0	0	0	0	0	0	0	0	0	0	1
1	43634	CAGTTTTAGT.CTTATCTCCA	C	T	0	1	0	0	0	0	0	0	0	0	1	1	0	1
1	43709	GAGCGAGCGT.AATCCAACGT	A	G	0	0	0	0	0	0	0	0	0	0	0	0	1	1
1	43736	AATTCATGCG.CAGCCCAAGA	C	G	0	0	0	0	0	0	0	0	0	0	1	1	1	1
1	43910	CGTAATGCAT.GAGTAATTCA	G	A	0	0	0	0	0	0	0	0	0	0	0	0	1	0
1	43973	TTAATGAACG.CGAGGCAATT	C	T	0	1	0	0	0	0	0	0	0	0	0	0	0	0
1	44027	ACTCTTTACC.ACCAAAGGAT	A	G	0	1	0	0	0	0	0	0	0	0	0	1	1	1
1	44051	GAATAATAAG.ACCCAAGAAG	A	G	0	0	0	0	0	0	0	0	0	0	0	0	1	1
1	44054	TAATAAGACC.CAAGAAGCCT	C	T	0	0	0	0	0	0	0	0	0	0	0	0	1	1
1	44099	CAGGAGGAAG.GTCTTTTAAT	G	A	0	0	0	0	0	0	0	0	0	0	0	0	1	0
1	44132	CCCATTCATC.CAGCATGCTA	C	A	0	1	1	0	0	0	0	0	0	0	1	1	1	1
1	44210	AGGGATATTT.TTCAAATTGC	T	G	0	0	0	0	0	0	0	0	0	0	0	1	0	0
1	44219	TTTCAAATTG.CGACCAATCT	C	A	0	0	0	0	0	0	0	0	0	0	0	0	1	0
1	44227	TGCGACCAAT.CTGGAGCCCC	C	T	0	0	0	0	0	0	0	0	0	0	1	0	0	0
1	44245	CCCATAAATA.ACTCTTTTTC	A	G	0	0	0	0	0	0	0	0	0	0	0	0	0	1
1	44261	TTTCCCACCA.GCTTGTTCCT	G	A	0	0	0	0	0	0	0	0	0	0	0	0	1	0
1	44273	TTGTTCCTGC.TTCTAAGGCT	T	C	0	0	0	0	0	0	0	0	0	0	0	0	0	1
1	44372	AAGGTTTAAA.CAAAATAATA	C	T	0	0	0	0	0	0	0	0	0	0	0	0	0	1
1	44402	CAATAAGGGG.AATCCCTAAA	A	G	0	0	0	0	0	0	0	0	0	0	0	0	1	0
1	44444	TGAAAGCAGT.AAGTATGGCT	A	C	0	0	1	0	0	0	0	0	0	0	0	0	0	0
1	44479	ACACTACCAG.TGACTCTATT	T	C	0	1	1	0	0	0	0	0	0	0	1	1	1	1
1	44480	CACTACCAGT.GACTCTATTT	G	A	0	0	0	0	0	0	0	0	0	0	0	0	1	0
1	44719	CGTGCTTTTA.AGTATAAAAT	A	G	0	1	1	0	0	0	0	0	0	0	1	1	1	1
1	44898	CTACCTTGCG.ACGAACTTCA	A	G	0	0	0	0	0	0	0	0	0	0	0	0	0	1
1	44911	AACTTCAGGA.ACAGGTTCAC	A	G	0	0	0	0	0	0	0	0	0	0	0	1	0	0
1	44924	GGTTCACCAT.AGTATTGGCG	A	G	0	0	0	0	0	0	0	0	0	0	0	0	1	0
1	45013	CTCTGCATAA.CGTTCAAATT	C	T	0	0	0	0	0	0	0	0	0	0	0	0	1	0
1	45072	TAGAAGGCTG.CAAGTATTGA	C	T	0	1	0	0	0	0	0	0	0	0	0	0	0	0
1	45138	ATGCAATGAC.TTCTTCTTCA	T	C	0	0	1	0	0	0	0	0	0	0	1	0	0	0
1	45171	CCACCATCAA.ACCACATTTT	A	T	0	0	0	0	0	0	0	0	0	0	0	0	1	0
1	45270	CTTTATATAG.ACGAGGTACA	A	G	0	0	1	0	0	0	0	0	0	0	0	0	0	0
1	45276	ATAGACGAGG.TACAGTCTCA	T	C	0	0	0	0	0	0	0	0	0	0	1	0	0	1
1	45288	CAGTCTCAAT.GTTGTGGTTA	G	A	0	0	0	0	0	0	0	0	0	0	0	1	0	0
1	45318	GTGGACATTC.GGTCATAATG	G	A	0	1	1	0	0	0	0	0	0	0	1	1	1	1
1	45426	AGTCCACAAA.ATGTTGTGCA	A	G	0	1	1	0	0	0	0	0	0	0	0	1	1	0
1	45465	CACGGTCAAC.TGAAGTGATT	T	C	0	1	1	0	0	0	0	0	0	0	1	1	1	1
1	45480	TGATTACTGC.ATATTTGAGC	A	G	0	1	1	0	0	0	0	0	0	0	0	1	1	0
1	45486	CTGCATATTT.GAGCTTAAGA	G	A	0	1	1	0	0	0	0	0	0	0	0	1	0	0
1	45516	TCTCTGCCAT.GTGGCGTGGT	G	A	0	0	0	0	0	0	0	0	0	0	1	0	0	1
1	45537	CATCAGGGTC.CAATGCATTT	C	T	0	1	0	0	0	0	0	0	0	0	0	1	0	0
1	45588	AACGACGTGT.ACAAATATCA	A	G	0	0	0	0	0	0	0	0	0	0	1	0	0	0
1	45603	TATCACCCAT.GATCATGAAT	G	A	0	0	0	0	0	0	0	0	0	0	0	0	0	1
1	45648	CTGGAAGGTT.AGGACAAGCT	A	C	0	1	1	0	0	0	0	0	0	0	1	1	1	1
1	45699	CACGTAAAGT.TGTTTTAATA	T	C	0	1	1	0	0	0	0	0	0	0	1	1	0	1
1	46317	GTGAATGGAA.ACAGTTCACT	A	G	0	1	1	0	0	0	0	0	0	0	0	0	0	0
1	46332	TCACTATGAA.GCAGGTCTTG	G	A	0	1	1	0	0	0	0	0	0	0	1	1	1	1
1	46350	TGCGTAATGC.ACACAAAGTG	A	G	0	1	1	0	0	0	0	0	0	0	1	1	1	1
1	46380	AGGTTGATAC.TCATACGCGC	T	G	0	1	1	0	0	0	0	0	0	0	0	0	1	1
1	46386	ATACTCATAC.GCGCTTTTAT	G	A	0	0	0	0	0	0	0	0	0	0	0	0	1	1
1	46398	GCTTTTATGA.CCGTAACAAA	C	T	0	0	0	0	0	0	0	0	0	0	0	0	0	1
1	46404	ATGACCGTAA.CAAAATTGGT	C	T	0	0	0	0	0	0	0	0	0	0	1	0	0	0
1	46422	GTGTCTTCCA.CGGTCGTGCA	C	T	0	0	0	0	0	0	0	0	0	0	1	0	0	1
1	46449	AAGACAAAAA.TACAGTTTTA	T	C	0	0	0	0	0	0	0	0	0	0	0	0	1	0
1	46476	GCCACGAAGG.CATTAAAGAA	C	T	0	0	0	0	0	0	0	0	0	0	0	0	1	1
1	46512	AAATCGTGAT.CGCGACAGGT	C	T	0	1	1	0	0	0	0	0	0	0	0	0	0	0
1	46524	CGACAGGTAG.TCGTCCTTAT	T	C	0	1	1	0	0	0	0	0	0	0	0	0	0	0
1	46563	TTGACCACCC.ACGCGTATTT	A	G,C	0	1	1	0	0	0	0	0	0	0	1	2	1	1
1	46662	ATGCCTCAAT.CTTTATTGGT	C	T	0	0	0	0	0	0	0	0	0	0	1	0	1	0
1	46677	TTGGTTTAGA.CCATAAAGTT	C	T	0	1	1	0	0	0	0	0	0	0	0	0	0	0
1	46719	AACTCTTAAG.TTATCTAGAT	T	C	0	1	1	0	0	0	0	0	0	0	0	0	0	0
1	46737	ATGATGAAAT.CGCCGATGCT	C	T	0	0	0	0	0	0	0	0	0	0	0	1	1	1
1	46752	ATGCTTTGTC.TTATCACTTA	T	G	0	0	0	0	0	0	0	0	0	0	1	0	0	0
1	46776	AACAGGGCGT.GTTGATTCGT	G	T	0	1	1	0	0	0	0	0	0	0	0	0	0	0
1	46824	CATTTGATGA.CCACGTTGTT	C	T	0	0	0	0	0	0	0	0	0	0	0	0	0	1
1	46890	GGTGTAATGG.TCGTTCAGGT	T	C	0	0	0	0	0	0	0	0	0	0	0	1	1	1
1	46917	AAGGTTTAGG.TCTTGAAAAT	T	C	0	0	0	0	0	0	0	0	0	0	1	0	0	0
1	46932	AAAATGTTGG.TTTAGTACCA	T	G	0	1	1	0	0	0	0	0	0	0	0	1	1	1
1	46935	ATGTTGGTTT.AGTACCAAAT	A	G	0	1	1	0	0	0	0	0	0	0	1	1	1	1
1	46947	TACCAAATAG.TCGTGGTCAA	T	C	0	1	1	0	0	0	0	0	0	0	0	1	0	1
1	47004	ACATCTATGC.TGCTGGTGAC	T	G	0	1	1	0	0	0	0	0	0	0	0	1	0	1
1	47091	GTGGTGAAGA.TGCTAAGCCA	T	C	0	1	1	0	0	0	0	0	0	0	0	1	0	1
1	47100	ATGCTAAGCC.AGTACGTGAT	A	G	0	0	0	0	0	0	0	0	0	0	1	1	0	0
1	47199	CGTATGAAGT.CGGTCAGGCT	C	T	0	0	0	0	0	0	0	0	0	0	0	0	0	1
1	47205	AAGTCGGTCA.GGCTTCTTTC	G	A	0	0	0	0	0	0	0	0	0	0	0	1	0	0
1	47223	TCCGTCATTT.AGCTCGTGCA	A	G	0	1	1	0	0	0	0	0	0	0	1	0	1	1
1	47253	GTGATACAGT.AGGTGAGTTG	A	G	0	0	0	0	0	0	0	0	0	0	0	0	1	0
1	47256	ATACAGTAGG.TGAGTTGAAG	T	C	0	0	0	0	0	0	0	0	0	0	1	0	0	0
1	47259	CAGTAGGTGA.GTTGAAGATT	G	A	0	0	0	0	0	0	0	0	0	0	0	0	1	0
1	47280	TTTTCCATCG.TGACACTTTG	T	A	0	1	1	0	0	0	0	0	0	0	0	0	0	0
1	47283	TCCATCGTGA.CACTTTGGAA	C	T	0	0	0	0	0	0	0	0	0	0	0	0	1	0
1	47397	TTGTTGAAAC.GACATTTAAC	G	A	0	0	0	0	0	0	0	0	0	0	1	0	0	0
1	47400	TTGAAACGAC.ATTTAACTAT	A	T	0	1	1	0	0	0	0	0	0	0	0	1	0	1
1	47415	ACTATCCAAC.AATGGCTGAA	A	C	0	0	0	0	0	0	0	0	0	0	0	1	0	1
1	47489	AGTTTTTCAT.GAAAAAGCCC	G	A	0	1	1	0	0	0	0	0	0	0	0	1	1	1
1	47499	GAAAAAGCCC.ACAAACTTGC	A	G	0	1	1	0	0	0	0	0	0	0	1	1	1	1
1	47537	TAGACCATAT.GTTTTTTATA	G	A	0	0	0	0	0	0	0	0	0	0	0	1	0	0
1	47584	CAGCGTCTCA.TCTCTTTAGT	T	C	0	0	0	0	0	0	0	0	0	0	0	1	1	0
1	47586	GCGTCTCATC.TCTTTAGTGT	T	C	0	0	0	0	0	0	0	0	0	0	1	0	0	0
1	47589	TCTCATCTCT.TTAGTGTGCA	T	C	0	1	1	0	0	0	0	0	0	0	1	1	1	1
1	47605	TGCACAAAAT.GCTTGATTAA	G	A	0	0	0	0	0	0	0	0	0	0	1	0	0	0
1	47625	AATATTCAAA.CAAATCAGGC	C	T	0	0	0	0	0	0	0	0	0	0	0	1	1	0
1	47634	ACAAATCAGG.CGTCTGTTTC	C	T	0	1	1	0	0	0	0	0	0	0	1	0	0	1
1	47658	AAACAATAGA.AAAAACCAGA	A	T	0	1	1	0	0	0	0	0	0	0	1	0	0	0
1	47690	AGGAAAGTCA.TAATTGTTTT	T	C	0	0	0	0	0	0	0	0	0	0	1	0	0	0
1	47708	TTCAAAAGTA.CGGCATTATG	C	T	0	1	1	0	0	0	0	0	0	0	0	0	0	0
1	47773	CCCCTAATAT.GCTCAATGCG	G	A	0	1	1	0	0	0	0	0	0	0	1	1	1	1
1	47801	GAGCCAAATC.ACATTGTAAT	A	G	0	1	1	0	0	0	0	0	0	0	1	0	0	1
1	47815	TGTAATTACC.TGTTAAATCA	T	A	0	0	0	0	0	0	0	0	0	0	0	0	0	1
1	47836	GGTTAACACC.ACCAAGCCAA	A	G	0	1	1	0	0	0	0	0	0	0	1	0	0	1
1	47881	GGGTGAAAAA.TACAATACCA	T	C	0	0	0	0	0	0	0	0	0	0	1	0	0	0
1	47947	CATTGGTGAG.AGGAACCGTA	A	C	0	1	1	0	0	0	0	0	0	0	1	0	0	1
1	47986	TGATAATACC.GAAAGCATAT	G	A	0	0	0	0	0	0	0	0	0	0	0	1	0	0
1	48019	TTAGAGGTAA.CAATAAGAAA	C	T	0	1	1	0	0	0	0	0	0	0	1	0	0	0
1	48040	CAATGATTGC.GATGCCGCGG	G	A	0	1	1	0	0	0	0	0	0	0	0	0	0	0
1	48043	TGATTGCGAT.GCCGCGGCTA	G	A	0	0	0	0	0	0	0	0	0	0	1	0	0	0
1	48085	TAGGTTTCGA.GAAACGATCT	G	A	0	0	0	0	0	0	0	0	0	0	0	0	0	1
1	48168	GTACCTGTAG.CGGCATCAAA	C	T	0	1	1	0	0	0	0	0	0	0	0	0	0	0
1	48214	GGTGAACACC.CAAAAAGACA	C	T	0	0	0	0	0	0	0	0	0	0	0	0	0	1
1	48216	TGAACACCCA.AAAAGACAAC	A	G	0	1	1	0	0	0	0	0	0	0	0	0	1	0
1	48217	GAACACCCAA.AAAGACAACT	A	G	0	1	1	0	0	0	0	0	0	0	0	0	1	1
1	48241	AGCCACATAC.TAAAAAGCCT	T	C	0	0	0	0	0	0	0	0	0	0	1	1	0	0
[truncated: 104,970 more rows]
